# Supplementary material for: T-cell metagene predicts a favorable prognosis in estrogen receptor-negative and HER2-positive breast cancers
Source: Breast Cancer Res. 2009 Mar 9;11(2):R15. doi: 10.1186/bcr2234 (PMC2688939; doi:10.1186/bcr2234)
Supplement: Additional file 1 — An Excel file containing the microarray expression data of the 569 Affymetrix ProbeSets from the immune-related cluster of the datasets Frankfurt and Frankfurt-2 together with estrogen receptor, progesterone receptor, and human epidermal growth factor receptor 2 status (0 = negative, 1 = positive). [file bcr2234-S1.xls]

## Sheet: Tabelle1
Sample	S_1	S_2	S_3	S_4	S_5	S_6	S_7	S_8	S_9	S_10	S_11	S_12	S_13	S_14	S_15	S_16	S_17	S_18	S_19	S_20	S_21	S_22	S_23	S_24	S_25	S_26	S_27	S_28	S_29	S_30	S_31	S_32	S_33	S_34	S_35	S_36	S_37	S_38	S_39	S_40	S_41	S_42	S_43	S_44	S_45	S_46	S_47	S_48	S_49
Dataset	FRA	FRA	FRA	FRA	FRA	FRA	FRA	FRA	FRA	FRA	FRA	FRA	FRA	FRA	FRA	FRA	FRA	FRA	FRA	FRA	FRA	FRA	FRA	FRA	FRA	FRA	FRA	FRA	FRA	FRA	FRA	FRA	FRA	FRA	FRA	FRA	FRA	FRA	FRA	FRA	FRA	FRA	FRA	FRA	FRA	FRA	FRA	FRA	FRA
pCR	na	na	na	na	na	na	na	na	na	na	na	na	na	na	na	na	na	na	na	na	na	na	na	na	na	na	na	na	na	na	na	na	na	na	na	na	na	na	na	na	na	na	na	na	na	na	na	na	na
DFS_months	23	56	62	79	21	21	42	51	45	34	57	26	25	45	62	39	48	62	13	49	76	47	71	52	59	16	1	37	77	70	70	58	27	47	64	81	61	20	77	19	47	11	29	51	76	8	69	75	35
DFS_event	1	0	0	0	1	1	0	0	0	0	0	1	0	1	0	0	0	0	1	0	0	0	0	0	1	1	0	0	0	0	0	0	0	0	0	0	0	0	0	0	0	1	1	1	0	1	0	0	1
ER	0	1	1	0	0	1	1	0	0	1	1	1	1	0	1	1	1	1	1	1	1	1	1	0	1	0	1	1	1	1	0	1	1	0	1	0	1	1	0	1	0	0	1	1	0	1	0	0	1
PgR	0	0	1	1	0	0	1	0	0	0	1	1	1	0	1	1	1	1	1	1	1	0	1	0	0	0	1	1	1	1	0	1	1	0	1	1	1	1	0	1	0	0	1	1	0	1	0	1	0
HER2	1	1	0	1	0	0	0	1	0	0	0	0	0	0	0	0	0	0	0	0	0	0	0	0	0	0	0	0	0	1	0	0	0	1	0	0	0	0	0	0	0	0	0	0	0	0	0	0	0
Affymetrix ProbeSet ID	S_1	S_2	S_3	S_4	S_5	S_6	S_7	S_8	S_9	S_10	S_11	S_12	S_13	S_14	S_15	S_16	S_17	S_18	S_19	S_20	S_21	S_22	S_23	S_24	S_25	S_26	S_27	S_28	S_29	S_30	S_31	S_32	S_33	S_34	S_35	S_36	S_37	S_38	S_39	S_40	S_41	S_42	S_43	S_44	S_45	S_46	S_47	S_48	S_49
1294_at	0.005056	0.003835	0.003458	0.004451	0.001298	0.002211	0.002147	0.003102	0.002922	0.002344	0.001677	0.003497	0.005276	0.004494	0.004841	0.003273	0.002751	0.002134	0.004436	0.003799	0.002345	0.002456	0.003998	0.001795	0.001343	0.003831	0.002745	0.003352	0.004171	0.003351	0.002477	0.002208	0.004403	0.003225	0.002343	0.004674	0.002247	0.003255	0.002852	0.003468	0.002973	0.004498	0.003463	0.00284	0.00327	0.003748	0.003229	0.003771	0.003085
1405_i_at	0.001613	-0.000207	-0.000921	0.005313	0.005791	0.002277	0.003907	0.002659	0.005484	-0.005371	0.004112	0.002942	0.003778	0.00857	0.004557	0.001256	0.006017	0.003831	-0.002547	0.003491	0.001016	0.005581	0.000761	0.003637	-0.003265	0.007696	0.001167	0.004065	0.003692	0.003995	0.005415	0.000615	0.004974	0.007409	0.003381	0.008163	-0.005126	0.002251	0.006678	0.003599	0.008008	0.010457	0.003708	-0.001622	0.003981	0.000925	0.007719	0.008531	0.008716
200628_s_at	0.004296	-0.001636	0.004533	0.006921	0.005913	0.004991	0.005114	0.004774	0.004811	0.005031	0.005022	0.005834	0.003961	0.00985	0.003814	0.004735	0.004473	0.005255	0.004039	0.003095	0.003294	0.004408	0.004878	0.005127	0.002446	0.00858	0.004204	0.003702	0.005157	0.005035	0.007025	0.004353	0.004451	0.009026	0.004347	0.005843	0.004335	0.004791	0.005557	0.00414	0.007656	0.009856	0.004403	0.004528	0.008682	0.005174	0.007601	0.008396	0.006038
200629_at	0.006499	0.00805	0.005373	0.008908	0.006553	0.007294	0.007653	0.006014	0.007041	0.006141	0.006151	0.006487	0.005888	0.01137	0.005051	0.005589	0.00657	0.007558	0.005586	0.00471	0.004412	0.006579	0.0054	0.007032	0.00476	0.010358	0.006049	0.0056	0.006683	0.007582	0.007794	0.00608	0.005933	0.009499	0.005862	0.007981	0.00477	0.00585	0.006815	0.005007	0.009443	0.011276	0.005178	0.006218	0.010219	0.005972	0.008948	0.009017	0.007683
200887_s_at	0.012303	0.011792	0.010098	0.015077	0.011619	0.010735	0.011303	0.010574	0.010476	0.009588	0.009417	0.011705	0.012465	0.015614	0.011793	0.011165	0.011848	0.012406	0.013314	0.009188	0.009125	0.011051	0.013048	0.011421	0.011689	0.01467	0.008522	0.009573	0.011733	0.01309	0.01292	0.009046	0.012832	0.014856	0.00988	0.013372	0.011417	0.00977	0.011828	0.009446	0.013484	0.014811	0.009226	0.010128	0.014458	0.01048	0.013595	0.013472	0.012409
200904_at	0.007886	0.008537	0.007009	0.011073	0.009095	0.007227	0.008031	0.00853	0.010447	0.005911	0.007609	0.008265	0.007645	0.011702	0.00736	0.006768	0.009041	0.008336	0.006622	0.008847	0.00721	0.008893	0.006557	0.009274	0.007611	0.010836	0.007286	0.006803	0.007891	0.008507	0.008042	0.007203	0.00934	0.009469	0.008478	0.012298	0.005216	0.007249	0.009352	0.00691	0.008205	0.010721	0.006674	0.007435	0.007483	0.007904	0.009267	0.008369	0.010516
200905_x_at	0.013716	0.012486	0.010656	0.015013	0.012801	0.010882	0.011867	0.012515	0.01269	0.010659	0.011402	0.011821	0.012125	0.016414	0.01235	0.011864	0.012564	0.012656	0.012059	0.012398	0.010966	0.012721	0.011841	0.013295	0.011703	0.014984	0.011023	0.011984	0.012721	0.012941	0.014013	0.010815	0.013488	0.014111	0.011341	0.015101	0.010787	0.01186	0.013396	0.012286	0.012803	0.01429	0.011404	0.011778	0.013432	0.012232	0.013598	0.014891	0.013985
200923_at	0.012258	0.016086	0.01072	0.015479	0.009125	0.012933	0.010673	0.008016	0.008574	0.00829	0.008429	0.013123	0.013361	0.009579	0.010645	0.011149	0.010045	0.00967	0.016687	0.010555	0.010338	0.011441	0.013251	0.009791	0.011198	0.012796	0.009842	0.010786	0.012956	0.014394	0.008583	0.009017	0.011756	0.012807	0.009745	0.008801	0.013826	0.01325	0.011204	0.010871	0.01222	0.012403	0.011835	0.009799	0.012881	0.011681	0.01218	0.012869	0.010088
201089_at	0.012178	0.008541	0.008596	0.009633	0.008684	0.008561	0.007651	0.00834	0.00863	0.008808	0.009705	0.008064	0.008971	0.012208	0.00929	0.00896	0.009454	0.009398	0.007255	0.008272	0.00792	0.008447	0.008852	0.010315	0.010007	0.010644	0.00773	0.008594	0.010568	0.007451	0.010494	0.008712	0.009008	0.009289	0.00735	0.009108	0.008671	0.007459	0.007645	0.008327	0.007861	0.010388	0.009831	0.009678	0.008228	0.010227	0.009076	0.009515	0.008109
201137_s_at	0.016116	0.015314	0.011234	0.015831	0.011736	0.011474	0.011877	0.014921	0.012829	0.010796	0.012089	0.013478	0.013874	0.014638	0.012174	0.011583	0.013736	0.012958	0.009635	0.01447	0.011683	0.012326	0.013565	0.015677	0.009602	0.014254	0.010909	0.014955	0.01531	0.011164	0.01611	0.010465	0.012728	0.016182	0.015193	0.016139	0.009907	0.012607	0.015283	0.014037	0.012564	0.014123	0.014356	0.014043	0.011547	0.012375	0.014498	0.015467	0.01575
201288_at	0.013784	0.01007	0.010485	0.012212	0.010445	0.01219	0.010863	0.012083	0.01132	0.00948	0.011537	0.011216	0.010952	0.015387	0.012009	0.010537	0.011925	0.010558	0.006476	0.011972	0.011255	0.011333	0.011541	0.012424	0.010321	0.012458	0.010418	0.012677	0.01197	0.010096	0.010895	0.011835	0.010139	0.010873	0.010742	0.013385	0.013797	0.012172	0.011253	0.012034	0.008977	0.012167	0.011628	0.012155	0.008922	0.011574	0.011462	0.011293	0.012503
201315_x_at	0.013373	0.016235	0.014014	0.016445	0.011938	0.01638	0.013909	0.013547	0.014702	0.013597	0.012624	0.012437	0.013956	0.012606	0.014682	0.014749	0.013805	0.011256	0.015283	0.013061	0.013446	0.013855	0.015101	0.01327	0.014009	0.014571	0.013831	0.013511	0.014015	0.014314	0.012156	0.013441	0.015142	0.012097	0.011208	0.01316	0.0138	0.014426	0.012135	0.012885	0.010715	0.014054	0.013062	0.014102	0.01229	0.016863	0.013381	0.01192	0.014094
201422_at	0.014427	0.011817	0.010306	0.015207	0.013038	0.012985	0.013904	0.012711	0.010954	0.010085	0.010527	0.011009	0.012253	0.016506	0.012447	0.011168	0.011036	0.012836	0.011594	0.012363	0.009148	0.010722	0.011343	0.012073	0.012693	0.015442	0.010278	0.010555	0.013972	0.012232	0.014822	0.009724	0.012019	0.01612	0.011073	0.012637	0.013483	0.00846	0.011317	0.01081	0.01208	0.014511	0.011196	0.013631	0.013467	0.014101	0.013686	0.016243	0.01207
201487_at	0.009488	0.008107	0.00699	0.009439	0.007762	0.008146	0.009818	0.009946	0.010722	0.004042	0.00687	0.006972	0.008376	0.011743	0.008728	0.007423	0.007293	0.01011	0.006941	0.010473	0.007016	0.00935	0.00424	0.01058	0.009254	0.014597	0.007063	0.008523	0.008268	0.008329	0.010772	0.007642	0.007492	0.012379	0.007673	0.012792	0.007522	0.004734	0.011926	0.006533	0.010705	0.012334	0.008202	0.008694	0.007637	0.008055	0.012457	0.011099	0.009911
201601_x_at	0.012235	0.014947	0.012542	0.016314	0.011282	0.016725	0.012225	0.011803	0.012693	0.010523	0.010699	0.012988	0.014109	0.014549	0.01464	0.014204	0.012526	0.009887	0.015767	0.012324	0.011632	0.012134	0.014972	0.012503	0.013145	0.014142	0.012362	0.011827	0.013001	0.013765	0.011793	0.010923	0.015291	0.013877	0.012213	0.012986	0.010413	0.012086	0.011506	0.011437	0.011682	0.013877	0.012879	0.012887	0.013357	0.013229	0.012559	0.012542	0.014305
201641_at	0.006461	0.009355	0.011757	0.014429	0.005454	0.010035	0.011327	0.005629	0.005545	0.010978	0.004104	0.009129	0.013561	0.007411	0.010724	0.011462	0.008279	0.005101	0.013847	0.008101	0.007576	0.014163	0.012529	0.005303	0.009618	0.010992	0.006609	0.009622	0.011654	0.011205	0.006693	0.008039	0.013193	0.012361	0.008803	0.008583	0.012954	0.009866	0.00582	0.008743	0.008967	0.011281	0.00904	0.009649	0.008353	0.008664	0.007575	0.00845	0.00772
201649_at	0.010353	0.008217	0.008548	0.011156	0.007055	0.008517	0.008821	0.007438	0.006891	0.006318	0.008714	0.009016	0.009269	0.012976	0.009012	0.009189	0.008103	0.008833	0.008775	0.007469	0.006781	0.010063	0.0105	0.007114	0.009851	0.011208	0.007115	0.007681	0.008856	0.009364	0.007797	0.00775	0.008649	0.010879	0.007457	0.009739	0.008075	0.008527	0.007189	0.00802	0.010887	0.010662	0.007241	0.008384	0.010243	0.00881	0.008975	0.012388	0.009671
201720_s_at	0.013652	0.009103	0.009655	0.012111	0.01134	0.00943	0.0109	0.01044	0.008937	0.009714	0.009972	0.009441	0.010597	0.014053	0.010291	0.010119	0.011571	0.011456	0.00808	0.009862	0.008247	0.010309	0.010681	0.012488	0.010022	0.013661	0.009388	0.010553	0.013256	0.009508	0.012387	0.009014	0.010312	0.012492	0.009841	0.013304	0.010347	0.009121	0.01035	0.010905	0.010393	0.012955	0.009482	0.011606	0.012195	0.012391	0.012407	0.013031	0.012146
201721_s_at	0.016259	0.012208	0.011971	0.01445	0.013784	0.012555	0.012985	0.012713	0.01268	0.011604	0.011687	0.012095	0.012618	0.016205	0.01219	0.012018	0.012699	0.012743	0.011291	0.01231	0.009866	0.011592	0.012402	0.014021	0.0125	0.014971	0.011228	0.013182	0.014548	0.011834	0.014492	0.010749	0.012444	0.014308	0.012132	0.014836	0.012102	0.012395	0.012478	0.012581	0.011716	0.014696	0.011638	0.014045	0.013546	0.014359	0.013767	0.014537	0.01358
201762_s_at	0.011517	0.014681	0.009471	0.011687	0.008461	0.010053	0.010393	0.00877	0.00847	0.006918	0.00833	0.010191	0.011671	0.013608	0.010469	0.008976	0.009494	0.00981	0.011648	0.008572	0.008919	0.010135	0.010268	0.010272	0.008979	0.011925	0.00854	0.009543	0.009636	0.010887	0.009914	0.00934	0.010423	0.011573	0.008626	0.011037	0.010827	0.009891	0.009976	0.009727	0.012559	0.012416	0.010494	0.008713	0.009657	0.007507	0.010938	0.012369	0.010138
201858_s_at	0.00812	0.007218	0.005016	0.007313	0.00637	0.00829	0.007241	0.009403	0.008368	0.006123	0.007357	0.006374	0.00612	0.011159	0.006703	0.006466	0.009357	0.007834	0.004166	0.010016	0.006146	0.008139	0.005176	0.008617	0.00671	0.012258	0.006542	0.00631	0.007972	0.006658	0.008366	0.006441	0.007399	0.009682	0.006859	0.011736	0.006373	0.005374	0.007994	0.006737	0.008671	0.010757	0.007081	0.008432	0.007866	0.007698	0.010008	0.010636	0.011434
201859_at	0.009647	0.005923	0.007531	0.009364	0.008535	0.010017	0.008858	0.009603	0.009528	0.00619	0.008172	0.007558	0.007557	0.011209	0.007491	0.006859	0.009209	0.00852	0.006871	0.009757	0.006807	0.008947	0.007068	0.008864	0.007737	0.011249	0.007585	0.007688	0.009065	0.00797	0.008851	0.008352	0.007343	0.009359	0.00734	0.011307	0.007477	0.007733	0.008545	0.008411	0.008878	0.011199	0.006753	0.009758	0.009087	0.009071	0.009888	0.009685	0.01068
202074_s_at	0.003193	0.004037	0.00663	0.007913	0.008328	0.007099	0.005749	0.005753	0.006966	0.006962	0.006434	0.006469	0.005276	0.009556	0.006427	0.006458	0.006226	0.005475	0.007412	0.005529	0.006373	0.00652	0.007624	0.008662	0.007272	0.008403	0.005532	0.005866	0.005442	0.007066	0.007995	0.004716	0.007399	0.006737	0.005966	0.006857	0.005495	0.006816	0.006851	0.007376	0.00644	0.008241	0.00571	0.005624	0.008696	0.007633	0.006153	0.008069	0.006445
202086_at	0.010149	0.009982	0.005373	0.013607	0.006057	0.003583	0.010668	0.007354	0.006579	0.00335	0.00825	0.008069	0.012236	0.015261	0.009839	0.00535	0.005306	0.00601	0.013382	0.006013	0.00028	0.011174	0.014034	0.006671	0.01114	0.012053	0.002187	0.006645	0.009837	0.011118	0.005047	0.003491	0.013127	0.015163	0.004578	0.008701	0.008268	0.006609	0.006882	0.003236	0.011148	0.010536	0.005076	0.003653	0.010764	0.006025	0.009353	0.009647	0.010644
202145_at	0.011865	0.001463	0.007363	0.01409	0.006115	0.004175	0.014277	0.010521	0.00906	0.00871	0.007868	0.007561	0.010113	0.017915	0.007008	0.006315	0.006565	0.007988	0.010815	0.00603	0.006515	0.007182	0.007996	0.007277	0.007563	0.011192	0.007881	0.006983	0.009241	0.010995	0.010243	0.006711	0.012176	0.009757	0.007757	0.009363	0.012126	0.010203	0.009729	0.006531	0.009865	0.012516	0.007219	0.009047	0.014148	0.009439	0.00791	0.010599	0.009256
202269_x_at	0.006628	0.003579	0.003946	0.010735	0.005422	0.005014	0.005669	0.003199	0.005056	0.003342	0.004291	0.005022	0.003877	0.012928	0.004179	0.004495	0.00565	0.007596	0.001658	0.004569	0.002638	0.005745	0.006357	0.009162	0.004034	0.011884	0.004723	0.004055	0.00482	0.006137	0.008921	0.003286	0.005476	0.010257	0.004401	0.007658	0.001029	0.003083	0.005972	0.006478	0.009635	0.012765	0.004813	0.004196	0.012025	0.004829	0.010126	0.01045	0.007284
202270_at	0.002412	-0.000847	0.000561	0.007548	0.00223	0.001519	0.002295	6.5e-05	0.002067	-0.000901	0.00152	0.001493	0.001382	0.007998	0.00172	0.001221	0.003291	0.004927	-0.001757	0.001332	-0.001949	0.002825	0.001946	0.004034	-0.000484	0.006399	0.000823	0.000681	0.002196	0.002896	0.005586	-0.000697	0.001305	0.006648	-0.000117	0.004805	-0.002983	-0.000531	0.003004	0.002269	0.008123	0.009435	-0.000196	-0.00089	0.008682	0.001178	0.006688	0.006766	0.003709
202295_s_at	0.011181	0.015474	0.00965	0.010719	0.010618	0.009793	0.011258	0.010672	0.009747	0.010216	0.010219	0.012125	0.010096	0.014031	0.010953	0.008936	0.009558	0.008953	0.00937	0.010011	0.008183	0.011554	0.010207	0.010822	0.010913	0.011569	0.008841	0.009538	0.010334	0.011051	0.012605	0.009527	0.010992	0.011952	0.009959	0.013223	0.009446	0.010883	0.013017	0.009856	0.007061	0.011343	0.009676	0.010887	0.005433	0.010945	0.011689	0.01241	0.011502
202307_s_at	0.005498	0.004617	0.002855	0.008982	0.00773	0.00574	0.005801	0.003606	0.005171	0.002458	0.002698	0.004118	0.007399	0.011892	0.005387	0.004252	0.00589	0.0069	0.007371	0.003307	0.00293	0.005575	0.005716	0.006951	0.003196	0.009971	0.001757	0.003986	0.006336	0.007744	0.006286	0.002868	0.005263	0.00933	0.003191	0.007837	0.002167	0.003892	0.006993	0.004491	0.010515	0.010919	0.001496	0.003241	0.009168	0.004795	0.008648	0.008769	0.007498
202411_at	0.014208	0.010985	0.009097	0.017661	0.008803	0.009011	0.01182	0.00964	0.009627	0.009997	0.009313	0.011579	0.016535	0.010309	0.012248	0.010726	0.007464	0.010368	0.018353	0.008454	0.007775	0.013853	0.016535	0.010461	0.014183	0.014285	0.007133	0.008553	0.014393	0.012078	0.01048	0.007495	0.016162	0.015558	0.00853	0.009387	0.009781	0.012938	0.007926	0.007677	0.011218	0.013694	0.007603	0.008943	0.015333	0.009562	0.010974	0.013904	0.011183
202430_s_at	0.003261	0.000713	0.001688	0.003963	0.004731	0.001634	0.0018	0.00383	0.0046	-0.001843	0.001722	0.003316	0.004427	0.006393	0.00311	0.001276	0.001985	0.000778	0.00304	0.001098	0.002651	0.004955	0.004201	0.00251	0.002922	0.004413	0.000681	0.002445	0.003648	0.00322	0.0027	0.002705	0.00538	0.004626	0.000763	0.004579	0.002965	0.00152	0.003852	2e-05	0.003761	0.003679	0.001098	0.002044	0.003832	0.00257	0.004495	0.003249	0.004402
202446_s_at	0.009496	0.008338	0.007494	0.011156	0.01006	0.006769	0.008798	0.00873	0.009472	0.004851	0.007407	0.007711	0.009353	0.013845	0.008946	0.007296	0.008598	0.007543	0.008764	0.008024	0.007889	0.009096	0.010703	0.008833	0.008654	0.011616	0.007351	0.00661	0.009129	0.008779	0.00845	0.00817	0.010681	0.010107	0.006489	0.010057	0.007672	0.007316	0.007769	0.007563	0.009513	0.010375	0.00834	0.007344	0.010464	0.008254	0.009217	0.009758	0.010109
202531_at	0.00509	0.004151	0.003105	0.006601	0.003942	0.0034	0.004069	0.003366	0.002783	0.002922	0.003772	0.004008	0.004413	0.007493	0.005613	0.005026	0.006127	0.005807	0.00429	0.003948	0.003614	0.003797	0.004404	0.004967	0.002079	0.006984	0.00363	0.003408	0.004752	0.00428	0.005159	0.002483	0.005317	0.006933	0.004813	0.007548	0.002709	0.00435	0.004492	0.006282	0.007791	0.008364	0.004714	0.003102	0.005566	0.003848	0.006158	0.006968	0.005579
202637_s_at	0.00812	0.002635	0.002716	0.006262	0.005119	0.001159	0.001582	0.004418	0.004231	0.002018	0.005108	0.003534	0.002294	0.008725	0.003956	0.005037	0.007141	0.003993	0.000674	0.003727	0.003201	0.003939	0.004377	0.006546	0.003432	0.008949	0.003308	0.002513	0.005185	0.00247	0.007616	0.002279	0.006254	0.007657	0.003847	0.005341	0.003012	0.002258	0.004536	0.004611	0.001911	0.008524	0.003093	0.003241	0.008234	0.00474	0.005176	0.007266	0.005216
202638_s_at	0.001502	0.001083	0.001708	0.004974	0.003716	0.000706	0.001751	0.002764	0.003582	7.6e-05	0.004296	0.003117	0.001972	0.00778	0.00245	0.004276	0.005739	0.002577	0.001036	0.00173	0.001427	0.003205	0.003418	0.006289	0.002441	0.006901	0.002184	0.001379	0.00415	0.00201	0.006414	0.001974	0.004892	0.005053	0.00273	0.003195	0.000471	0.001576	0.003713	0.004784	0.001111	0.007271	0.002183	0.001965	0.007181	0.003406	0.004179	0.005168	0.00375
202659_at	-0.000374	0.002333	0.003335	0.006035	0.003084	0.004888	0.002714	0.002944	0.002119	0.003764	0.002421	0.003903	0.005141	0.007692	0.00513	0.004489	0.004188	0.004674	0.004926	0.0024	0.002348	0.003605	0.003416	0.004434	0.002594	0.007904	0.001955	0.004834	0.005531	0.005374	0.004038	0.001626	0.004942	0.004793	0.003191	0.007086	0.003558	0.0029	0.006629	0.004383	0.005695	0.007096	0.001412	0.003164	0.004215	0.004328	0.004686	0.007728	0.004118
202665_s_at	0.0039	0.004283	0.002133	0.005017	0.002996	0.002867	0.003499	0.003012	0.003707	0.002225	0.002049	0.002886	0.002002	0.005198	0.003034	0.002917	0.004527	0.00334	0.001509	0.003296	0.003018	0.00447	0.001782	0.004391	0.002842	0.005924	0.001708	0.001086	0.003552	0.002709	0.002925	0.002792	0.004002	0.005118	0.001958	0.006773	0.003128	0.001035	0.003301	0.003289	0.003215	0.005022	0.00357	0.00326	0.003489	0.003887	0.004064	0.005006	0.005573
202693_s_at	0.004976	0.001054	0.002247	0.003891	0.004245	0.004064	0.003304	0.003305	0.004314	0.003321	0.003432	0.002024	0.001784	0.004484	0.002161	0.001793	0.003977	0.00388	0.002406	0.004663	0.001688	0.002558	0.002277	0.006332	0.002708	0.005505	0.001926	0.002943	0.003302	0.001868	0.003307	0.002063	0.002749	0.004486	0.001192	0.006494	0.001657	0.003085	0.003564	0.002561	0.003681	0.005009	0.00291	0.003912	0.002598	0.003516	0.005983	0.004138	0.005701
202748_at	0.009424	0.004247	0.004698	0.007828	0.003886	0.004731	0.004424	0.003999	0.004717	0.003337	0.003588	0.004502	0.00343	0.007287	0.004384	0.004565	0.006397	0.006186	0.002099	0.003738	0.004373	0.006607	0.005751	0.005708	0.004718	0.007239	0.00568	0.005212	0.005366	0.005934	0.004994	0.005573	0.004756	0.006444	0.004146	0.00702	0.001424	0.00347	0.005191	0.004547	0.004676	0.00686	0.00428	0.005763	0.006824	0.005226	0.006181	0.006193	0.006035
202803_s_at	0.010028	0.005798	0.00672	0.008388	0.00905	0.006007	0.007396	0.007609	0.009255	0.004467	0.006807	0.006471	0.00768	0.011866	0.008045	0.004533	0.008605	0.00904	0.005075	0.006346	0.0057	0.00625	0.006715	0.009505	0.007307	0.009768	0.005421	0.008244	0.009776	0.006999	0.009426	0.004437	0.006607	0.00834	0.007119	0.010829	0.00593	0.008	0.008618	0.007317	0.006373	0.009397	0.007118	0.00951	0.00791	0.008512	0.009815	0.010809	0.008883
202838_at	0.007841	0.006033	0.006539	0.008932	0.006274	0.008872	0.006649	0.00929	0.008734	0.006434	0.006849	0.008432	0.009556	0.00816	0.008473	0.008421	0.007576	0.007737	0.00907	0.009133	0.007396	0.006671	0.008115	0.006699	0.008168	0.011275	0.007743	0.008652	0.009361	0.007685	0.006801	0.00699	0.007805	0.007915	0.007512	0.010012	0.007978	0.009409	0.007947	0.008433	0.006981	0.006886	0.008838	0.008023	0.006338	0.008648	0.007667	0.010036	0.008502
202869_at	0.006756	-0.001457	0.003263	0.009439	0.003204	0.001569	0.006896	0.005302	0.00096	0.001394	0.001596	0.004895	0.007697	0.001774	0.005784	0.001228	0.004524	0.00246	0.007217	0.000845	0.000956	0.002938	0.009717	0.000423	0.005827	0.007379	-0.000708	0.002244	0.006234	0.00467	0.00316	-0.000546	0.004693	0.009593	0.003746	0.003263	0.005023	0.000143	0.003543	5.2e-05	0.005678	0.003795	0.003586	0.005349	0.007426	0.004046	0.006667	0.005922	0.007183
202901_x_at	-0.011026	-0.003913	-0.003676	0.000895	-0.002869	-0.001785	-0.001478	-0.001513	-0.000983	-0.003934	-0.00122	-0.003913	-0.00115	-0.000702	-0.002737	-0.003454	-0.001513	-0.002851	-0.001609	-0.002347	-0.004001	-0.000692	-0.00277	-0.003589	-0.002622	0.000296	-0.002461	-0.004407	-0.001881	-0.00153	-0.000748	-0.003325	-0.004719	-0.001947	-0.002691	0.000518	-0.003287	-0.002396	-0.001936	-0.00145	-0.00019	0.001811	-0.001343	-0.001411	-0.002185	-0.001914	0.00035	0.001315	-0.000593
202902_s_at	0.009329	0.004493	0.006267	0.009761	0.008253	0.006885	0.007801	0.010914	0.008921	0.005458	0.008392	0.005888	0.0094	0.013548	0.007743	0.005913	0.009298	0.010199	0.006227	0.008517	0.004763	0.008436	0.00695	0.009801	0.006525	0.01349	0.006967	0.006442	0.008984	0.00864	0.010758	0.00669	0.00618	0.011274	0.007296	0.011541	0.006845	0.006953	0.009757	0.008888	0.010037	0.012724	0.008899	0.010756	0.009773	0.008731	0.010178	0.013899	0.009699
202910_s_at	0.002537	-0.001153	0.001165	0.001507	0.000867	0.00192	0.002699	0.001205	0.002093	-0.002352	-0.001723	0.000783	0.000796	0.004437	-0.000651	0.000129	-0.000521	0.001391	-0.004612	-0.00029	-0.000589	0.001967	-0.000171	0.001786	8e-05	0.003907	-0.000552	0.000713	0.000896	0.001451	0.003338	-0.00077	-0.000108	0.002891	-0.000336	0.00362	0.002701	-0.000795	0.002332	0.001167	0.004494	0.003148	0.001238	0.000834	0.002554	0.001014	0.001691	0.00349	0.003304
202953_at	0.007603	0.008854	0.004469	0.010553	0.007605	0.007891	0.009688	0.008493	0.010425	0.006511	0.006291	0.007354	0.008526	0.011013	0.007898	0.006512	0.009046	0.011221	0.006221	0.009155	0.004636	0.007289	0.006952	0.009997	0.006137	0.011644	0.005457	0.008883	0.00935	0.008132	0.010845	0.004645	0.007608	0.011914	0.007514	0.011433	0.008621	0.006117	0.009182	0.007515	0.010428	0.012146	0.009019	0.00994	0.008344	0.00935	0.010739	0.01201	0.009327
202957_at	0.007474	0.004262	0.004885	0.006972	0.0073	0.004072	0.006374	0.008483	0.00746	0.004101	0.007085	0.006662	0.006261	0.008874	0.007557	0.005975	0.00847	0.007266	0.00393	0.007692	0.004812	0.007869	0.005158	0.007318	0.003572	0.009258	0.004801	0.007447	0.008212	0.006108	0.008335	0.005481	0.006902	0.008767	0.006596	0.010706	0.004075	0.006534	0.007743	0.006338	0.006378	0.008765	0.005918	0.007271	0.005036	0.006069	0.009102	0.008763	0.010065
203104_at	0.006979	0.005236	0.005752	0.006929	0.007207	0.005094	0.005569	0.005634	0.009715	0.004204	0.004709	0.005355	0.006397	0.006892	0.00602	0.005627	0.006909	0.005964	0.003235	0.007485	0.004533	0.004844	0.005893	0.007137	0.004668	0.008684	0.004694	0.007828	0.010357	0.005464	0.006888	0.005358	0.005447	0.004782	0.006382	0.008239	0.00408	0.006292	0.007434	0.005942	0.004818	0.008662	0.007384	0.007796	0.006052	0.007241	0.007873	0.005674	0.007037
203153_at	0.007708	0.007509	0.004191	0.012415	0.003352	0.003583	0.009325	0.003737	0.005251	0.002513	0.00612	0.007418	0.010972	0.007689	0.007239	0.003907	0.003307	0.002261	0.011961	0.001158	0.002565	0.00781	0.012542	0.003334	0.007426	0.008159	0.003135	0.004793	0.007269	0.009793	0.002501	0.003956	0.010118	0.007958	0.002795	0.004789	0.006062	0.004288	0.00136	0.001148	0.006507	0.00799	0.004485	0.003094	0.008085	0.001951	0.005424	0.005401	0.007699
203281_s_at	-0.004504	-0.00508	0.005269	0.005643	0.002139	0.002901	0.001978	0.00229	0.003606	0.002873	0.000939	0.004484	0.005762	0.001931	0.007541	0.004204	0.004025	0.00215	0.005762	0.003436	0.004659	0.004198	0.005281	0.002295	0.000336	0.002734	0.002171	0.005435	0.006077	0.004136	0.002514	0.003354	0.005805	0.002757	0.00272	0.006402	0.00251	0.004121	0.00428	0.003289	0.004917	0.00571	0.003269	0.003709	0.004086	0.003947	0.002809	0.004987	0.003271
203320_at	0.002313	0.004461	0.002662	0.004443	0.004001	0.003264	0.004012	0.005051	0.005585	0.002071	0.002903	0.003058	0.003527	0.0031	0.003472	0.003567	0.004619	0.00323	0.003546	0.003452	0.003441	0.002861	0.002854	0.004488	0.003223	0.005848	0.002696	0.003831	0.004815	0.002495	0.004161	0.002253	0.00392	0.004545	0.003623	0.0049	0.002599	0.003266	0.003481	0.002915	0.004456	0.004703	0.003703	0.003728	0.003027	0.003699	0.004354	0.004314	0.005203
203332_s_at	0.003422	0.003438	0.004178	0.004846	0.004898	0.001856	0.004192	0.004798	0.004143	0.002845	0.003147	0.004344	0.004415	0.004952	0.00503	0.004352	0.005403	0.004778	0.002642	0.004979	0.004182	0.003695	0.00443	0.005206	0.00219	0.006033	0.003026	0.004547	0.005796	0.003618	0.005658	0.003049	0.005117	0.005726	0.004732	0.0079	0.00291	0.005073	0.004992	0.00539	0.002732	0.005307	0.005039	0.004019	0.003791	0.004109	0.004349	0.005384	0.006129
203388_at	-0.000532	0.002535	0.001362	0.003918	0.003844	0.001858	0.002944	0.006001	0.003491	-0.001047	0.003321	0.002996	0.002673	0.006254	0.003559	0.00278	0.003689	0.003294	0.001803	0.002576	0.000664	0.002876	0.002783	0.002697	-0.000263	0.003665	0.000878	0.003679	0.004499	0.002028	0.004314	-0.000737	0.00329	0.004333	0.002639	0.005002	0.002527	0.003378	0.003754	0.001877	0.002587	0.005047	0.001238	0.003688	0.003052	0.002369	0.003219	0.004736	0.004084
203402_at	0.00224	-0.004528	-0.00095	0.000625	0.000761	0.000255	0.00096	0.001875	0.000598	1.2e-05	-0.001337	0.000211	-0.000127	0.001897	0.000891	-0.000107	0.00144	0.001839	-0.001621	0.000906	-0.001217	-0.000436	-0.001678	0.000865	-0.001047	0.00136	-0.001018	0.000629	0.001656	0.000158	-0.000985	-0.003641	0.001537	0.001615	0.000978	0.002995	-0.001231	-0.002997	3e-06	-0.001435	0.000841	0.000989	-0.00057	0.000659	0.000629	0.001784	0.000973	0.002033	0.002038
203416_at	0.009745	0.010152	0.007363	0.009857	0.009661	0.007832	0.008398	0.010508	0.010417	0.006959	0.00839	0.008322	0.007895	0.012571	0.00893	0.008351	0.009775	0.009158	0.006965	0.009111	0.007135	0.008752	0.007477	0.009493	0.007735	0.011595	0.007356	0.008437	0.009707	0.008432	0.010195	0.007311	0.00917	0.010443	0.007837	0.013244	0.007593	0.008739	0.009288	0.008416	0.008454	0.01123	0.008731	0.009545	0.008785	0.008891	0.010914	0.011585	0.011418
203470_s_at	0.003326	-0.005788	0.000309	0.003027	0.003156	0.000602	0.003079	0.002151	0.001225	0.000247	0.002142	0.00257	5.7e-05	0.003508	-0.000179	0.000761	0.002309	0.001731	0.000617	0.001572	0.000975	0.002525	0.002536	0.002924	0.002755	0.005201	0.000409	0.00178	0.002181	0.001115	0.003723	0.000497	0.002434	0.00451	0.001352	0.005748	-0.000291	5.2e-05	0.003927	0.001111	0.004374	0.005607	0.001719	0.00337	0.002919	0.002931	0.004691	0.003152	0.001638
203471_s_at	0.004814	0.003596	0.001343	0.001768	0.002376	0.001256	0.002354	0.003867	0.002901	-0.000912	0.001324	0.002417	0.001899	0.003486	1.5e-05	0.001622	0.00377	0.002352	0.001421	0.00233	0.000241	0.001785	0.00105	0.003449	0.000319	0.004517	0.000418	0.001216	0.002313	0.001754	0.003553	0.001072	0.002765	0.004782	0.00102	0.00681	0.001499	0.000979	0.003569	0.002485	0.006176	0.005273	0.0011	0.001654	0.002087	0.003033	0.004409	0.005001	0.003464
203472_s_at	-0.007614	-0.004251	-0.001249	-0.000834	-0.002239	-0.003508	-0.001765	-0.002327	-0.000157	-0.004789	-0.00168	-0.00284	-8.5e-05	-0.001782	-0.000341	-0.001694	0.000184	0.001866	-0.002889	0.00141	-0.002415	-0.001311	-0.000132	0.002381	-0.003101	0.003849	-0.004756	-0.000542	0.001181	-0.002722	0.001344	-0.002766	0.000197	0.001263	4.3e-05	0.001844	0.000273	-0.002517	0.000189	-0.00114	0.000595	0.002709	0.000558	0.001034	-0.000691	0.001422	0.002012	0.002082	0.00165
203473_at	0.008215	0.006481	0.005637	0.007028	0.005905	0.004726	0.005091	0.006185	0.009226	0.005492	0.005266	0.004567	0.005777	0.007821	0.006414	0.005762	0.00752	0.006944	0.004956	0.006126	0.004489	0.003949	0.005769	0.006378	0.004739	0.009893	0.003742	0.005981	0.007531	0.003993	0.007142	0.004075	0.007045	0.007148	0.006257	0.00877	0.005627	0.006012	0.005856	0.006517	0.003943	0.009227	0.00632	0.006004	0.005914	0.007439	0.006414	0.007155	0.007968
203508_at	-0.001497	-0.001154	0.000513	0.001169	0.002097	0.00058	0.001644	0.002553	0.004146	-0.001371	-0.000136	0.003427	0.001354	0.002309	0.002246	-0.001149	0.001649	0.001383	0.001001	0.002416	0.000406	0.001825	0.000356	0.002037	0.000276	0.002533	-0.000593	0.000896	0.001137	0.001782	0.001232	-0.001078	0.002868	0.003897	0.001703	0.004897	0.000516	0.001608	0.003215	0.001984	0.002512	0.003743	0.00139	0.001746	0.00032	0.001098	0.001531	0.003317	0.003599
203528_at	0.000557	-0.000404	0.002193	0.000831	0.002856	-8.7e-05	0.00206	0.002944	0.00113	0.001326	0.000835	0.002786	0.0014	0.005278	0.003023	0.001702	0.003615	0.002166	0.001861	0.001976	0.001203	0.001398	0.001234	0.00299	0.000147	0.004296	-0.000256	0.003215	0.00375	0.002411	0.002677	4.1e-05	0.003768	0.003531	0.001503	0.00547	-2.2e-05	0.001454	0.004234	0.001016	0.00228	0.004762	0.002225	0.002329	0.003006	0.00045	0.005236	0.00512	0.004632
203547_at	0.005211	0.000974	0.004274	0.006193	0.004954	0.003032	0.004704	0.006219	0.005903	0.003141	0.004698	0.004298	0.005054	0.007117	0.005153	0.0044	0.006178	0.005641	0.003	0.005667	0.003673	0.004929	0.004438	0.00531	0.003027	0.007304	0.003155	0.004859	0.00625	0.003625	0.006453	0.002963	0.005022	0.005836	0.004581	0.008197	0.003437	0.004056	0.005724	0.004201	0.004377	0.006914	0.004552	0.004782	0.004604	0.004508	0.005709	0.006825	0.00627
203561_at	0.007939	0.004119	0.002286	0.004558	0.003081	0.004262	0.002764	0.00221	0.004928	0.001481	0.003424	0.001369	0.002855	0.005436	0.002834	0.001199	0.004277	0.00228	0.00067	0.003598	0.000901	0.002087	0.003186	0.005552	0.002882	0.00792	0.002239	0.00374	0.003147	0.000151	0.003675	0.002952	0.002434	0.004623	0.002463	0.002653	0.002489	0.002356	0.002821	0.002326	0.003838	0.005612	0.00419	0.004544	0.003721	0.005769	0.005516	0.002773	0.003396
203595_s_at	-0.001709	0.004233	0.003298	0.004438	0.003246	0.002612	0.003912	0.002994	0.003721	0.002378	0.002488	0.002239	0.004504	0.004029	0.003562	0.002785	0.002866	0.001541	0.005334	0.00074	0.002398	0.004044	0.005302	0.001404	0.003432	0.003109	0.002493	0.000175	0.003661	0.003412	0.001843	0.002639	0.005213	0.001992	0.001681	0.002672	0.002949	0.003494	0.002465	0.001499	0.004666	0.0044	0.001534	0.003083	0.003359	0.002522	0.002973	0.002825	0.003542
203596_s_at	-0.001272	-6.6e-05	0.002362	0.005169	0.003775	0.001377	0.002265	0.002759	0.002045	0.000644	0.00114	0.002443	0.004176	0.001044	0.002666	0.001625	0.00066	0.00126	0.004003	0.001069	0.002444	0.000277	0.003679	0.001543	0.001715	0.005092	-0.0007	0.001869	0.002754	0.002768	0.001755	0.000276	0.004836	0.002122	0.002045	0.001836	0.000873	0.003844	-0.000155	0.001939	0.002358	0.004418	0.002147	0.001833	0.001315	0.001499	0.002514	0.002632	0.003135
203645_s_at	0.00713	0.0063	0.00536	0.008665	0.008498	0.010383	0.008023	0.007749	0.010043	0.00335	0.005943	0.006208	0.006184	0.010157	0.006685	0.005269	0.005357	0.008367	0.00531	0.010671	0.004221	0.00655	0.005086	0.009057	0.006934	0.012214	0.005449	0.005811	0.006907	0.006856	0.011319	0.005831	0.006591	0.009192	0.005958	0.009277	0.006734	0.005358	0.008244	0.005847	0.008571	0.010367	0.007941	0.009785	0.009319	0.008444	0.009515	0.00875	0.008497
203760_s_at	0.003161	-0.003216	0.001862	0.003291	0.00248	0.003598	0.00204	0.001549	0.002866	0.00128	0.002557	0.002168	0.002271	0.004554	0.001307	0.001764	0.002739	0.003245	-0.001959	0.00102	0.000376	0.002725	0.002105	0.003054	0.00038	0.004447	0.000244	0.002943	0.002363	0.000852	0.002396	0.000649	0.00151	0.003558	0.002194	0.003055	0.001241	0.001161	0.002555	0.002734	0.002393	0.004596	0.003876	0.00227	0.00194	0.003425	0.003503	0.003863	0.003902
203761_at	0.007686	0.005151	0.003452	0.00479	0.005249	0.003871	0.004861	0.005019	0.005564	0.001336	0.00371	0.003628	0.005323	0.006602	0.004733	0.003424	0.005676	0.00528	0.003776	0.006168	0.003673	0.004885	0.003015	0.006072	0.002869	0.007808	0.002976	0.003956	0.005547	0.003595	0.005666	0.002087	0.004738	0.006315	0.003363	0.007545	0.0025	0.003903	0.00526	0.004547	0.004257	0.006362	0.005202	0.005632	0.004224	0.005774	0.006351	0.006968	0.006917
203828_s_at	-0.001691	-0.002372	0.001898	0.006617	0.005916	0.002733	0.002914	0.004444	0.003443	0.002631	0.00413	0.003924	0.003221	0.010147	0.003569	0.005287	0.006939	0.00602	-0.002957	0.001501	0.002612	0.003141	0.005982	0.008138	0.0013	0.008567	0.003212	0.00423	0.003022	0.004049	0.006528	0.001139	0.00333	0.005231	0.003212	0.007981	-0.004198	0.00351	0.004636	0.004427	0.004509	0.008603	-7.6e-05	0.003493	0.004377	0.005103	0.006043	0.007836	0.006841
203868_s_at	0.006854	0.005624	0.004663	0.009969	0.00679	0.003923	0.004786	0.006496	0.007022	0.003877	0.005668	0.006071	0.00401	0.007344	0.00378	0.004139	0.006346	0.006504	0.003013	0.003571	0.004788	0.005401	0.006146	0.005603	0.002726	0.009807	0.004339	0.005618	0.006479	0.005246	0.008857	0.004932	0.003412	0.008248	0.003652	0.010233	0.006874	0.003661	0.008458	0.003716	0.007218	0.009474	0.002016	0.005841	0.007386	0.007917	0.008463	0.008317	0.007905
203879_at	0.00143	0.000961	0.003028	0.003563	0.004601	0.001808	0.002497	0.004959	0.004292	0.002039	0.002942	0.004166	0.001595	0.005003	0.004363	0.003308	0.004861	0.003939	0.000728	0.002787	0.002444	0.00312	0.00207	0.004992	0.001038	0.004455	0.00202	0.003494	0.003615	0.003605	0.004735	0.001419	0.004119	0.003305	0.002506	0.007808	0.000121	0.003058	0.004448	0.003088	0.003883	0.004506	0.002763	0.00319	0.002365	0.003425	0.003521	0.004468	0.005858
203882_at	0.007126	0.011725	0.007043	0.010487	0.007451	0.006303	0.007756	0.007538	0.006063	0.005309	0.008029	0.008255	0.009978	0.010365	0.008507	0.007358	0.007528	0.007251	0.009724	0.005579	0.005398	0.009044	0.010381	0.007325	0.008271	0.009082	0.005434	0.007292	0.00815	0.009682	0.006503	0.006577	0.010591	0.0083	0.007023	0.008121	0.006676	0.008169	0.006918	0.006597	0.008285	0.008726	0.006719	0.00668	0.007548	0.006586	0.008306	0.008144	0.009217
203915_at	0.005649	0.005222	0.00068	0.011276	0.008737	0.003771	0.006516	0.006494	0.002823	0.001855	0.004672	0.007157	0.003756	0.015877	0.005319	0.005085	0.008366	0.011763	0.001857	0.005463	-0.000242	0.008449	0.004293	0.010575	0.000616	0.01369	0.000198	0.002079	0.005865	0.007718	0.013151	0.000453	0.007391	0.013781	0.006721	0.014426	0.002048	0.002299	0.011511	0.007574	0.011931	0.014939	0.006445	0.000613	0.00838	0.003861	0.014916	0.015159	0.011121
203922_s_at	0.003735	0.000623	0.000445	0.002952	0.002419	-0.000428	0.001705	0.000477	0.002087	-3.5e-05	4e-06	0.001426	0.001564	0.006418	0.000198	0.000932	0.001167	0.003576	0.000596	0.002071	-0.002152	-0.000845	0.002165	0.002674	-0.001198	0.006968	-0.001128	0.000646	0.003526	6.1e-05	0.003076	-0.00074	0.000177	0.003636	0.001079	0.002795	0.000973	0.000783	0.001463	0.001469	0.002856	0.006072	0.000633	0.001477	0.002814	0.002494	0.0046	0.004287	0.002806
203923_s_at	0.004988	0.005115	0.00512	0.005971	0.006067	0.003668	0.004764	0.003925	0.006151	0.003666	0.003282	0.004494	0.005755	0.007524	0.003745	0.003343	0.003893	0.00668	0.00255	0.003524	0.000546	0.00191	0.004122	0.006146	0.002705	0.009261	0.001516	0.005465	0.00787	0.004904	0.005909	-0.000781	0.002855	0.005745	0.004917	0.004398	0.003479	0.005033	0.006629	0.004904	0.005114	0.009063	0.002645	0.005793	0.004799	0.005445	0.006059	0.005155	0.005128
203927_at	0.002739	-0.000139	8.4e-05	0.002968	0.002538	0.002137	0.001758	0.002988	0.002047	0.001183	0.001558	0.002044	0.001632	0.003448	0.002559	0.001532	0.002401	0.002045	0.001018	-0.001159	0.000651	0.002082	0.001906	0.003212	4.5e-05	0.002986	0.002387	0.001861	0.002531	0.000984	0.002822	0.000558	0.002892	0.003098	0.001232	0.003604	0.002066	0.001888	0.002116	0.003144	0.00421	0.004128	0.001367	0.00112	0.002019	0.002216	0.002626	0.003717	0.001984
203932_at	0.009726	0.007008	0.006195	0.009225	0.008044	0.00619	0.007546	0.009356	0.007906	0.006941	0.007425	0.007009	0.007483	0.010157	0.008442	0.007196	0.010429	0.009237	0.005456	0.008005	0.006123	0.008162	0.007158	0.009674	0.006942	0.011707	0.006549	0.009373	0.009552	0.006992	0.009852	0.005778	0.008519	0.010368	0.008933	0.012395	0.006742	0.007513	0.009819	0.007685	0.007397	0.01171	0.009043	0.007488	0.007694	0.00947	0.010212	0.010572	0.010868
204006_s_at	0.007198	0.005233	0.001429	0.005278	0.004874	0.002346	0.006156	0.000141	0.003438	0.005075	0.006893	0.002023	0.006081	0.006785	0.003977	0.004813	0.006305	0.0073	0.003763	0.005301	0.001461	0.005591	0.006694	0.007947	0.004631	0.010389	0.003558	0.005915	0.005587	0.003076	0.007022	0.003233	0.002844	0.009211	0.005044	0.003662	0.004393	0.00262	0.002749	0.004622	0.007547	0.00932	0.002715	0.004292	0.007424	0.005693	0.009134	0.007544	0.002359
204057_at	0.007036	0.003835	0.003754	0.005502	0.005063	0.002826	0.004354	0.006995	0.005185	0.001846	0.004236	0.004618	0.003351	0.007199	0.006091	0.004036	0.005913	0.005211	0.002221	0.005961	0.002494	0.006669	0.004512	0.004669	0.002871	0.006308	0.00382	0.004286	0.005246	0.003767	0.005025	0.003623	0.005436	0.004895	0.004753	0.009016	0.002907	0.00461	0.005755	0.005487	0.004444	0.005877	0.004446	0.004728	0.002754	0.003814	0.006074	0.00539	0.006966
204116_at	0.005532	0.002934	0.002118	0.005129	0.005427	0.001785	0.004719	0.00704	0.004896	0.000454	0.003946	0.005382	0.002053	0.008416	0.005206	0.002737	0.005762	0.00539	0.002824	0.004264	0.002487	0.005414	0.003442	0.005387	0.002077	0.008814	0.002491	0.003441	0.004736	0.005033	0.005923	0.002449	0.004823	0.007065	0.00322	0.010538	0.003089	0.002456	0.006557	0.003342	0.005426	0.008462	0.002419	0.004137	0.00323	0.00296	0.007774	0.009812	0.009256
204118_at	0.005309	0.004553	0.003882	0.006921	0.006981	0.00332	0.006499	0.009514	0.00581	0.003095	0.00508	0.007469	0.004501	0.010151	0.007241	0.004611	0.00817	0.00753	0.004158	0.006459	0.004729	0.008026	0.004841	0.007032	0.002898	0.00811	0.00376	0.005169	0.006184	0.006773	0.007156	0.004327	0.007709	0.007837	0.006161	0.013396	0.004096	0.005512	0.008633	0.005892	0.005271	0.009381	0.005516	0.005431	0.00478	0.003942	0.008249	0.00892	0.011243
204122_at	0.009182	0.008014	0.006382	0.00911	0.007329	0.007562	0.008183	0.008831	0.007965	0.005659	0.00758	0.006046	0.008985	0.009323	0.008518	0.006404	0.009747	0.008433	0.005897	0.009015	0.005519	0.007236	0.008006	0.009528	0.007537	0.009815	0.006503	0.008881	0.010257	0.007441	0.00935	0.006267	0.007781	0.009324	0.007553	0.008788	0.007585	0.006561	0.008189	0.007644	0.007988	0.009553	0.008404	0.009095	0.008312	0.009919	0.008836	0.009663	0.007767
204153_s_at	0.000762	0.003257	-0.00059	0.001662	0.002023	0.000367	0.002381	0.0033	0.002255	-0.000429	0.000791	0.002415	3.5e-05	0.002847	0.002739	6e-06	0.001188	0.000601	0.00138	0.002446	0.001257	0.000609	0.00053	0.001603	0.000185	0.003041	0.000619	0.001814	0.002912	0.000372	0.002069	0.000528	0.002022	0.000753	0.002597	0.005856	-0.00025	0.002229	0.002111	0.001848	-0.000333	0.002476	0.00102	0.002418	-0.000982	0.002466	0.002257	0.002798	0.004494
204174_at	0.011064	0.005339	0.006848	0.006515	0.00679	0.006473	0.006576	0.008905	0.008005	0.007001	0.00641	0.005603	0.007885	0.009572	0.007985	0.006673	0.008182	0.005792	0.002865	0.007394	0.005929	0.005506	0.007637	0.008922	0.005085	0.00897	0.006692	0.009878	0.010833	0.005921	0.006118	0.006044	0.006371	0.006371	0.004696	0.00914	0.005166	0.008963	0.006214	0.007844	0.005785	0.008773	0.00867	0.00721	0.006781	0.009559	0.007758	0.008707	0.007793
204192_at	-0.001896	-0.001969	0.002085	0.003867	0.003791	0.000607	0.002927	0.004829	0.001934	-0.000488	0.00212	0.003185	0.00191	0.004032	0.004891	0.002044	0.00509	0.003616	0.000292	0.002026	0.000642	0.004123	0.001344	0.003843	-0.001115	0.004403	0.00031	0.003075	0.003391	0.001797	0.001979	0.000387	0.003734	0.003722	0.003274	0.010732	0.000123	0.002411	0.005363	0.002139	0.001331	0.004642	0.002816	0.002304	0.000832	0.002736	0.004485	0.005106	0.008528
204205_at	-0.000824	0.001863	-0.000664	0.001268	0.000926	-0.001196	0.001383	0.001272	0.000838	-0.005121	0.001233	-0.001538	0.000756	0.001174	0.003948	0.001268	0.002705	0.002006	-0.005142	0.000429	-0.00046	0.003035	0.00087	0.000312	0.00095	0.003899	0.001212	0.002257	-0.00129	0.001987	0.000738	-0.000268	0.001092	0.003286	-0.000939	0.004629	-0.002573	0.00023	0.001103	-0.000941	0.003669	0.005633	-0.000109	-0.001799	-0.000775	0.000596	0.004944	0.004419	0.003156
204220_at	0.004444	4e-06	0.001075	0.002715	0.003392	0.000915	0.002664	0.003906	0.004349	-0.000122	0.00195	0.00255	0.002744	0.005546	0.002632	0.00186	0.002978	0.0029	-0.001205	0.002668	0.001648	0.002997	0.000109	0.003253	0.000926	0.004543	0.000682	0.00342	0.003312	0.002124	0.003806	0.001513	0.002085	0.002851	0.001465	0.006923	0.000246	0.002152	0.003092	0.001507	0.001655	0.004526	0.002358	0.003359	0.001362	0.002459	0.003545	0.004236	0.005088
204224_s_at	0.005249	0.000731	0.003153	0.005963	0.002538	0.003099	0.003617	0.005251	0.004696	0.003512	0.005899	0.003308	0.002072	0.006352	0.003091	0.002168	0.004142	0.003299	0.005242	0.000657	0.001273	0.003328	0.002532	0.004289	0.003138	0.00629	0.001914	0.003098	0.005883	0.004532	0.005382	0.004364	0.002534	0.00618	0.000488	0.006289	0.002141	0.002935	0.003357	0.001979	0.005254	0.006652	0.001105	0.001349	0.003562	0.002313	0.007072	0.005798	0.004942
204232_at	0.011997	0.009256	0.007574	0.010988	0.008973	0.007948	0.008381	0.009545	0.008988	0.007268	0.00812	0.007265	0.007887	0.011114	0.008394	0.007461	0.009222	0.008177	0.007166	0.007752	0.006872	0.007472	0.008299	0.009668	0.007692	0.011988	0.006757	0.009208	0.010502	0.0077	0.010535	0.006803	0.008214	0.010997	0.008103	0.009702	0.009124	0.007376	0.008352	0.007878	0.008746	0.011224	0.00764	0.009571	0.009724	0.010462	0.010729	0.010934	0.009037
204265_s_at	0.002585	0.002407	0.001129	0.003128	0.003517	0.001228	0.003384	0.004993	0.00355	0.001144	0.002659	0.002897	0.002532	0.0056	0.00462	0.002286	0.004007	0.003325	0.001335	0.002993	0.001031	0.003659	0.00467	0.004024	0.001119	0.006048	0.001916	0.003908	0.004064	0.003384	0.003929	0.001253	0.003891	0.004386	0.003956	0.007924	0.002201	0.001748	0.00483	0.000179	0.002291	0.00495	0.002758	0.002824	0.002116	0.003229	0.005388	0.005609	0.006051
204269_at	0.000832	0.004902	0.000274	0.001493	0.003719	-0.00178	0.001696	0.002231	0.001152	-4.1e-05	-0.000114	0.00269	0.001259	0.005625	0.001027	0.00049	0.000595	0.002502	0.000778	0.00059	0.000676	0.000536	0.000883	0.001995	0.001798	0.007662	-0.00033	0.002519	0.002098	0.002506	0.002078	0.000243	0.000993	0.004083	0.00191	0.004474	0.000625	0.003639	0.003522	0.000181	0.001184	0.005913	0.000852	0.002507	0.001779	-0.001335	0.002445	0.007055	0.004382
204279_at	0.006182	0.004411	0.004906	0.011279	0.007568	0.005814	0.005849	0.006752	0.006119	0.003283	0.004877	0.005471	0.00841	0.01217	0.00685	0.005776	0.007398	0.009053	0.008193	0.006261	0.005491	0.007348	0.007403	0.007537	0.004179	0.011436	0.005143	0.005676	0.008117	0.007739	0.007284	0.003604	0.00653	0.008719	0.004675	0.009747	0.003779	0.005713	0.008202	0.006391	0.010996	0.012002	0.004539	0.003979	0.010543	0.005414	0.010173	0.009996	0.009598
204415_at	0.008147	0.007018	0.003111	0.011716	0.004962	0.006262	0.008266	0.003526	0.002344	0.003635	0.00304	0.006732	0.010076	0.006415	0.004878	0.006045	0.003531	0.005608	0.012137	-0.000528	-0.000122	0.005927	0.009704	0.003856	0.006771	0.008245	0.002577	0.004798	0.008711	0.008707	0.003076	0.00262	0.006286	0.007858	0.004865	0.002748	0.006418	0.005563	0.003829	0.00364	0.005897	0.006583	0.000417	0.003958	0.00775	0.006335	0.004714	0.002803	0.006009
204436_at	0.005003	0.004322	0.004661	0.007305	0.0068	0.005191	0.006301	0.005236	0.006119	0.004794	0.004379	0.004895	0.005373	0.007426	0.005445	0.005452	0.00659	0.005825	0.006267	0.004729	0.004208	0.004675	0.005505	0.006362	0.004245	0.007041	0.004562	0.0058	0.006759	0.004835	0.006757	0.004069	0.005529	0.00603	0.005102	0.00631	0.005023	0.005974	0.005415	0.006106	0.004429	0.00609	0.0051	0.006512	0.006233	0.007379	0.00585	0.006841	0.006312
204439_at	0.003338	0.001634	-0.002149	0.005899	-0.000504	-0.001504	0.003919	0.002064	-0.00105	-0.002323	0.002496	0.000793	0.005945	0.004165	0.005631	0.001927	0.001517	0.000416	-0.000207	0.000333	-0.002922	0.006202	0.004422	-0.001452	0.001862	0.003758	-0.000921	-0.001318	0.002459	0.003346	-0.000397	0.000438	0.008392	0.00635	-0.000133	0.005733	0.003105	-0.00351	-0.000434	-0.002663	0.007026	0.003643	-0.002715	-0.00337	0.003362	-0.003226	0.006466	0.002633	0.005404
204445_s_at	0.00121	5.8e-05	0.002689	-0.000491	-0.000645	-0.001241	0.000109	0.00055	-0.000953	-0.000949	-0.000709	-0.000107	0.000757	0.00215	0.003118	-0.000166	0.001396	-0.000673	-0.000677	-0.000573	-0.001171	-0.000165	-0.001348	0.000739	-0.000223	0.001172	-0.000175	0.001332	0.000715	-0.001155	0.000494	-0.001227	0.000198	0.001272	-0.001144	0.001667	-0.001586	-0.00071	-0.00017	0.000153	-0.00016	0.000375	-5.9e-05	-5e-06	0.000692	-8.5e-05	0.00155	0.001672	-0.00057
204446_s_at	0.001665	-0.001208	0.006149	0.004414	0.003854	0.00271	0.003607	0.00455	0.004613	0.001923	0.003009	-0.000237	0.003499	0.005217	0.007031	0.001629	0.004664	0.003414	-0.000221	0.004743	0.002187	0.003038	0.002311	0.005089	0.002411	0.00524	0.003892	0.00578	0.004222	0.001546	0.00365	0.002692	0.004249	0.003284	0.00093	0.00527	0.000747	0.003465	0.003357	0.003897	0.002384	0.006593	0.003367	0.002998	0.002497	0.003127	0.005156	0.004114	0.003117
204502_at	0.003607	-0.002697	0.003164	0.004401	0.003764	0.00178	0.004649	0.004985	0.004234	0.001467	0.003015	0.004059	0.003759	0.005524	0.002451	0.003745	0.004229	0.004351	0.000991	0.003252	0.001032	0.003294	0.003033	0.00326	0.002571	0.005843	0.001162	0.00256	0.004278	0.00467	0.004052	0.0016	0.001251	0.00373	0.003532	0.00459	0.003352	0.00208	0.004605	0.003663	0.003905	0.005373	0.002492	0.004348	0.003286	0.002528	0.005119	0.005782	0.005352
204513_s_at	0.001946	-0.000716	0.0008	0.00272	0.001612	-6.7e-05	0.001251	0.003131	0.003705	0.000516	0.001117	0.002041	0.001534	0.002282	0.001912	0.002801	0.003793	0.001369	-0.000855	0.001412	0.000789	0.001749	0.000706	0.001999	0.000884	0.004065	0.000562	0.00171	0.00294	0.000795	0.00248	0.000417	0.002089	0.00104	0.001136	0.00501	0.000798	0.001426	0.003489	0.002786	0.001066	0.003753	0.000905	0.002462	-0.000871	0.002691	0.003934	0.002618	0.004629
204533_at	0.008075	0.005709	0.003722	0.014685	0.006968	0.004484	0.009555	0.006876	0.006277	0.003146	0.007119	0.007184	0.007902	0.014015	0.007541	0.008105	0.009996	0.009885	0.008018	0.004258	0.000615	0.007112	0.010075	0.009852	0.004557	0.014943	0.002406	0.005458	0.009406	0.007703	0.011665	0.002545	0.009026	0.014095	0.0069	0.010698	0.00743	0.003879	0.009306	0.008073	0.01309	0.014141	0.00649	0.00262	0.013786	0.004284	0.013843	0.012894	0.008818
204562_at	-0.000982	0.000896	-0.00034	-0.001507	0.00124	-0.002056	-0.000702	0.002078	4.3e-05	-0.00119	-0.001739	-0.001665	-0.002609	0.004111	-0.000195	-7.2e-05	0.000453	0.001093	-0.00343	0.001359	-0.000662	-0.000839	-0.002037	8.8e-05	-0.00359	0.004951	-0.001518	-0.000372	-0.001321	0.000187	0.000133	0.000173	0.000279	-0.000498	-0.000285	0.005141	-0.001611	-0.00099	0.00238	-0.000575	-0.00066	0.00353	-0.001821	0.000233	-0.00144	-0.00255	0.002031	0.005025	0.004136
204563_at	0.000424	-0.003035	-0.001448	0.001878	0.00332	-0.001619	0.00127	0.005378	0.002821	-0.00422	0.002006	0.003537	-5.7e-05	0.005417	0.002955	0.001435	0.002314	0.00368	0.000716	0.002508	0.000356	0.004824	0.000168	0.002667	0.000721	0.004684	-0.001513	-0.00041	0.001955	0.002262	0.001793	0.000694	0.002277	0.002399	0.002156	0.010417	-0.00188	2.9e-05	0.005338	0.000841	0.002414	0.003679	-0.000564	-0.000416	0.000381	-0.002686	0.005868	0.004195	0.009587
204588_s_at	0.007149	0.004468	0.001612	0.006921	0.005767	0.003832	0.005021	0.004315	0.004228	0.002235	0.002926	0.002768	0.003077	0.00772	0.002847	0.002645	0.003824	0.004686	0.002104	0.004635	0.001192	0.004246	0.003661	0.004791	0.003638	0.007395	0.003389	0.004235	0.005743	0.002417	0.006135	0.00248	0.003598	0.00564	0.003358	0.004571	0.002807	0.002358	0.002669	0.002185	0.003646	0.007589	0.002549	0.005199	0.004675	0.004521	0.005693	0.006725	0.003398
204655_at	0.003233	0.002481	0.000749	0.004209	0.00305	0.000997	0.003664	0.002246	0.003937	0.000732	0.003295	0.002376	0.003008	0.007167	0.003979	0.002594	0.004091	0.004622	0.000163	0.002941	0.000994	0.004103	0.002838	0.004001	0.000877	0.005081	0.002649	0.003281	0.00307	0.003302	0.004883	0.002621	0.004273	0.005581	0.001907	0.006376	0.000326	0.002978	0.004824	0.004277	0.006605	0.008552	0.00231	0.001607	0.004472	0.000595	0.005581	0.006595	0.006038
204661_at	-0.004379	-0.000638	0.003383	0.004995	0.006046	0.001433	0.004659	0.009458	0.004538	0.002283	0.004587	0.006477	0.001862	0.006504	0.00592	0.003405	0.005709	0.006319	-0.00071	0.003612	0.002643	0.006178	0.00026	0.005377	0.002334	0.007031	0.002067	0.003382	0.004031	0.005567	0.005789	0.001732	0.005734	0.006697	0.003235	0.012329	-0.002313	0.001864	0.008135	0.003805	0.004887	0.00742	0.002197	0.010114	0.000208	0.005633	0.006831	0.008661	0.010357
204670_x_at	0.017476	0.015947	0.01359	0.016701	0.014278	0.01264	0.014957	0.01605	0.013858	0.012268	0.013884	0.01461	0.014427	0.016332	0.015132	0.014525	0.015231	0.015528	0.012906	0.013595	0.013692	0.014043	0.014816	0.01587	0.01222	0.016497	0.013161	0.014653	0.015863	0.014004	0.015466	0.012361	0.015387	0.016588	0.01511	0.016457	0.013447	0.013611	0.015409	0.016478	0.013611	0.016626	0.014811	0.01577	0.01603	0.016737	0.016104	0.01637	0.015234
204747_at	0.004179	0.001933	0.002905	0.010521	0.002903	0.002478	0.007363	0.002962	0.002676	0.002181	0.003852	0.003951	0.006653	0.008514	0.005776	0.004444	0.003783	0.004026	0.008637	0.003042	0.000947	0.004955	0.008939	0.003899	0.005083	0.007868	0.002691	0.004022	0.005391	0.006049	0.003993	0.002233	0.008397	0.006871	0.002845	0.004784	0.003561	0.002711	0.003179	0.002631	0.006056	0.007137	0.003479	0.002059	0.007904	0.003623	0.005988	0.006714	0.005751
204769_s_at	0.000826	0.002928	0.002088	0.003929	0.002091	0.002468	0.001156	-0.000348	0.001491	0.002295	0.000122	0.001586	0.000823	0.002564	0.002068	0.00052	0.001648	0.001127	0.003495	0.00091	0.00109	0.000987	0.002807	0.002018	0.000268	0.004525	-0.000455	-0.00031	0.002157	0.003022	0.003932	0.000667	0.00048	0.004421	0.001338	0.000745	0.000383	0.001051	0.001609	0.001454	0.002562	0.005872	-0.000523	-0.000221	0.003913	0.002041	0.00355	0.001169	0.003779
204774_at	0.001898	0.001204	0.002996	0.005105	0.005918	0.005176	0.003697	0.003972	0.004033	0.00215	0.003653	0.002266	0.002996	0.005382	0.002768	0.003106	0.006009	0.002815	0.000992	0.00466	0.001385	0.004372	0.003018	0.005178	0.002787	0.005671	0.000331	0.004641	0.005012	0.002688	0.004331	0.002481	0.00248	0.004507	0.000503	0.006815	0.000984	0.004285	0.002865	0.002711	0.003337	0.005718	0.004547	0.004894	0.003611	0.003393	0.005819	0.002193	0.004316
204785_x_at	0.003873	-0.002391	0.003049	0.002696	0.004266	0.003122	0.003082	0.004339	0.005345	0.001682	0.002747	0.002878	0.001688	0.00566	0.002908	0.002693	0.00348	0.002938	0.002232	0.00302	0.003379	0.002394	0.001865	0.00449	0.002713	0.006365	0.002771	0.003788	0.002813	0.003397	0.005736	0.001802	0.003582	0.005021	0.0031	0.005711	0.003181	0.003333	0.004992	0.003381	0.006871	0.006442	0.002683	0.004445	0.002417	0.003866	0.006087	0.005484	0.004322
204789_at	-0.004277	-0.002282	-0.001973	0.000181	-0.000952	-0.002805	-0.000415	0.000362	-0.000286	-0.004961	-0.002056	-0.000135	-0.001369	0.001281	0.001083	-0.005994	0.000451	0.000213	-0.006297	-0.000963	-0.001554	-3.9e-05	-0.001521	-0.001218	-0.006559	0.00119	-0.002457	-0.000565	0.000854	-0.001967	0.001142	-0.002096	-0.000366	-0.002305	-0.000909	0.002595	-0.000263	-0.002673	5.2e-05	-0.003808	-0.001495	0.002585	-0.002114	-0.000913	-0.001156	0.000868	-0.000173	0.000517	0.002559
204804_at	0.002826	0.000811	0.003065	0.00607	0.001752	0.003433	0.004252	0.002379	0.002655	0.001126	0.001836	0.0045	0.004997	0.004023	0.00425	0.003929	0.004045	0.003842	0.005183	0.002957	0.003348	0.003182	0.004525	0.003673	0.003611	0.005378	0.001854	0.003281	0.00451	0.004416	0.002959	0.003028	0.004982	0.004255	0.003896	0.005249	0.001554	0.002797	0.003406	0.003933	0.006637	0.005584	0.00217	0.002639	0.004116	0.003456	0.005114	0.004533	0.005083
204806_x_at	0.011309	0.01107	0.00898	0.016679	0.012379	0.010277	0.01134	0.009042	0.009536	0.009078	0.007918	0.01099	0.013297	0.017469	0.011559	0.011869	0.012424	0.013081	0.011201	0.010052	0.008805	0.011805	0.011259	0.013033	0.010553	0.014623	0.009928	0.009584	0.013368	0.012571	0.01193	0.008454	0.012782	0.011129	0.010752	0.014118	0.008426	0.008947	0.011549	0.010617	0.012409	0.014662	0.009549	0.009146	0.012781	0.010867	0.010729	0.014029	0.013794
204820_s_at	0.003659	0.008217	0.00684	0.010812	0.007719	0.00602	0.005559	0.006958	0.007511	0.004179	0.005142	0.004365	0.007021	0.008435	0.00644	0.007315	0.00793	0.007031	0.006286	0.006008	0.005635	0.008498	0.007071	0.007239	0.006551	0.008918	0.006526	0.007607	0.007541	0.006866	0.007214	0.006162	0.00811	0.007388	0.005659	0.010995	0.002894	0.007244	0.008148	0.007744	0.008653	0.011022	0.006615	0.007638	0.007964	0.007711	0.009262	0.009155	0.008521
204821_at	-0.00563	-0.005265	0.000638	0.004467	-0.000121	0.000473	0.001223	0.001291	0.001379	-0.001331	-0.000655	0.001216	0.001244	0.000697	0.000838	-0.00022	0.001716	0.00207	-0.001065	0.002252	9.7e-05	0.00174	0.000794	0.000985	-0.003778	0.00432	-7.3e-05	0.002492	0.001328	0.001138	0.000147	0.000209	0.00354	7.9e-05	0.000423	0.004248	-0.004562	0.001112	0.002597	3.2e-05	0.003133	0.004958	-0.000999	0.000507	0.001822	-0.001305	0.003623	0.002023	0.000447
204834_at	0.001427	0.003154	0.001853	0.005129	0.002454	0.001192	0.002532	0.003893	0.006282	0.000548	0.002289	0.003844	0.002301	0.005989	0.003612	0.001795	0.004392	0.00472	0.001806	0.004899	0.00179	0.002902	0.001808	0.0049	-0.000111	0.007408	0.000964	0.003448	0.005355	0.003263	0.004643	0.002364	0.003035	0.005801	0.002881	0.006839	0.000863	0.001446	0.004567	0.003205	0.004765	0.00723	0.002609	0.00287	0.002409	0.002699	0.005884	0.005817	0.006132
204852_s_at	-0.005419	-0.004027	-0.002391	0.000865	0.001199	-0.001919	0.00109	0.001369	0.001009	-0.002069	-0.000232	7.7e-05	-0.000835	0.002437	0.000508	-0.000384	0.000674	0.001163	0.000121	-0.001773	-0.001541	-0.000724	-0.000212	0.000733	-0.003365	0.00282	-0.002571	0.000832	0.000559	0.001217	0.001334	-0.003178	0.001196	0.002366	-0.000245	0.00351	-0.002725	-0.000312	0.000716	0.000197	0.001448	0.003155	-0.002707	-0.000627	-0.000412	-0.000736	0.001796	0.002102	0.001915
204858_s_at	0.007217	0.008925	0.002815	0.008382	0.00662	0.006324	0.007638	0.005383	0.006023	0.004578	0.004197	0.005014	0.008001	0.009607	0.005834	0.006779	0.006898	0.005725	0.005921	0.004987	0.004796	0.006869	0.006283	0.008288	0.004102	0.010802	0.003848	0.005874	0.007615	0.006658	0.00773	0.004109	0.005444	0.008068	0.006335	0.00604	0.005927	0.006039	0.005768	0.006888	0.009005	0.008649	0.004651	0.004918	0.009033	0.007063	0.005779	0.007239	0.006468
204882_at	-0.002195	-0.00445	-0.004271	0.001077	0.000466	-0.00252	8.1e-05	0.001101	-0.00062	-7.3e-05	-0.001385	0.000365	-0.002181	0.001434	-0.000361	-0.001359	-0.000219	0.000372	-0.00736	-0.000882	-0.000548	-0.001018	-0.0008	0.000697	-0.004559	0.003319	-0.002774	0.000693	0.000198	0.000572	0.00152	-0.00643	0.001535	9.5e-05	-0.00018	0.005622	-0.009543	-0.00096	0.001718	-0.002259	0.000726	0.002125	-0.000353	-0.001439	-0.005568	-0.000488	0.000604	0.001898	0.004616
204890_s_at	-0.003318	-0.005265	-0.003023	0.00028	-0.001422	-0.005946	0.001004	0.001928	-7.1e-05	-0.006506	-0.000733	0.000859	-0.001073	0.001937	0.000574	-0.002525	0.000987	0.001865	-0.001677	0.000331	-0.003178	0.001986	-0.007993	0.000325	-0.009381	0.003114	-0.002909	-0.000607	-0.001646	0.000683	0.00019	-0.002708	0.001116	0.001934	-0.000824	0.005444	-0.006549	-0.002632	0.002545	-0.001434	0.001145	0.002857	-0.001329	-0.008453	-0.001682	-0.003151	0.002608	0.003627	0.004421
204891_s_at	-0.002305	-0.001116	-0.004968	0.002707	0.001891	-0.002592	0.001923	0.004539	0.001996	-0.0075	0.000297	0.001358	0.000734	0.004367	0.003002	9.4e-05	0.003969	0.004031	-0.00567	0.001679	-0.001472	0.003928	-0.004746	0.003899	-0.012083	0.004835	-0.006848	-0.00041	0.000367	0.002466	0.003151	-0.00317	0.002279	0.00277	0.00178	0.008016	-0.007163	4.5e-05	0.005472	0.001558	0.00253	0.005307	-0.000811	-0.002677	-0.000545	-0.010131	0.004863	0.005717	0.005777
204912_at	0.000732	0.001346	0.002951	0.004366	0.00441	0.003861	0.003987	0.00541	0.006133	0.001668	0.003362	0.004586	0.003921	0.006899	0.00421	0.003586	0.004371	0.005779	0.002287	0.005876	0.002783	0.004108	0.003397	0.004837	0.002535	0.00674	0.001222	0.004704	0.004657	0.004016	0.005273	0.002225	0.004493	0.005285	0.004271	0.007264	0.002228	0.003725	0.005038	0.003852	0.003557	0.006208	0.004344	0.004538	0.002965	0.004231	0.004696	0.006255	0.006911
204923_at	0.007512	0.005243	0.001912	0.002827	0.003398	-4.4e-05	0.003002	0.003954	0.002449	0.000489	0.001962	0.002558	0.002102	0.004794	0.003496	0.002231	0.003424	0.002936	0.000723	0.000911	0.001138	0.00247	0.001473	0.003298	0.0011	0.004611	0.001722	0.002102	0.003901	0.002619	0.003104	0.000837	0.003418	0.004413	0.003032	0.007007	0.000556	0.00174	0.003504	0.002727	0.001925	0.004729	0.001816	0.002904	0.001378	0.002856	0.004754	0.004763	0.0055
204924_at	0.00163	-0.003225	-0.000594	0.005502	0.003387	0.000105	0.002709	0.001343	0.003411	0.002071	0.000874	-0.001259	0.003179	0.005515	0.000706	0.00165	0.003864	0.002359	0.000865	0.001993	0.00108	0.000916	0.00356	0.004353	0.001708	0.007603	0.001117	0.001704	0.003926	0.001917	0.002374	0.000474	0.001572	0.005169	-0.000198	0.003694	-0.001685	0.001112	0.002767	0.002723	0.002462	0.005625	0.004121	0.003329	0.004847	0.003174	0.003952	0.002243	0.002028
204929_s_at	-0.001271	-0.007047	0.000706	0.004153	0.00097	0.001337	0.002195	0.001265	0.001268	0.001257	0.000112	0.001436	0.000661	-0.000395	0.001715	0.000764	0.000641	0.000865	0.000241	0.000823	0.000408	-9.4e-05	-0.000173	0.002054	0.001367	0.003041	-0.000563	0.000949	0.000824	0.002394	0.002277	-8.6e-05	0.001072	0.002645	0.001426	0.003118	0.001283	0.000635	0.001696	0.00093	0.000153	0.003597	0.000981	0.001607	0.001656	0.002035	0.002441	0.003298	0.001722
204959_at	0.001649	0.000805	0.001425	0.004227	0.003212	0.000948	0.003939	0.002859	0.004509	-0.00042	0.003497	0.001465	0.004158	0.003274	0.003344	0.001807	0.005003	0.003071	0.000718	0.003502	-6e-05	0.00322	0.003105	0.003851	-0.000207	0.006428	-0.000252	0.005387	0.003098	0.002567	0.004071	0.001521	0.003405	0.004534	0.003188	0.005052	0.000818	0.002203	0.003179	0.002296	0.003846	0.006467	0.00133	0.004832	0.002441	0.002287	0.00508	0.003957	0.003565
204960_at	0.000143	-0.007065	-0.006755	-0.001427	-0.001863	-0.00522	-0.006456	0.000293	-0.00418	-0.00664	-0.006309	-0.001177	-0.001738	0.003789	-0.000145	-0.007315	-0.003574	0.00128	-0.008483	-0.003208	-0.00326	0.001096	-0.009598	0.000317	-0.007735	0.001845	-0.012323	-0.000694	-0.002365	0.000583	0.000905	-0.009714	-0.000831	-0.002697	-0.008199	0.007937	-0.010938	-0.002316	0.002713	-0.000202	-0.000821	0.004146	-0.002596	-0.010424	-0.009298	-0.004002	0.002613	0.000859	0.004734
204961_s_at	-0.008275	-0.007292	-0.008391	-0.001949	-0.000804	-0.008774	-0.006893	-0.002301	-0.002609	-0.006648	-0.004867	-0.007496	-0.007041	-0.001916	-0.000959	-0.006824	-0.001329	0.001626	-0.005891	-0.007048	-0.009608	-0.000201	-0.007382	-0.000746	-0.010844	0.002979	-0.00806	-0.002378	0.000553	-0.003425	-0.002401	-0.00847	-0.008047	-0.000999	-0.007311	0.004569	-0.008642	-0.008045	0.00095	-0.007454	-0.00097	0.001832	-0.007688	-0.007579	-0.001823	-0.003605	0.000938	-8.1e-05	0.000957
204972_at	0.007531	0.007264	0.003634	0.009356	0.003052	0.002348	0.006636	0.003996	0.003016	0.001293	0.002659	0.004034	0.008443	0.007746	0.005805	0.003869	0.003645	0.00387	0.009735	0.003345	0.000487	0.005414	0.009519	0.004638	0.004631	0.0082	3.4e-05	0.003509	0.006079	0.006989	0.004205	0.001797	0.007507	0.009668	0.001885	0.006508	0.005358	0.003268	0.002532	0.003562	0.005812	0.007302	0.002819	0.00163	0.007189	0.002965	0.005829	0.007406	0.007355
204994_at	0.007074	0.005119	0.003041	0.009265	0.003145	0.001976	0.005651	0.004473	0.004923	0.00276	0.003453	0.005075	0.004042	0.006978	0.005983	0.00239	0.00295	0.003734	0.005883	0.003664	0.001804	0.003926	0.004841	0.004513	0.004906	0.007642	0.001302	0.003121	0.00427	0.004886	0.006082	0.003465	0.005468	0.006514	0.00393	0.005412	0.004077	0.002803	0.00469	0.003004	0.00411	0.007268	0.003873	0.00399	0.00663	0.003187	0.005511	0.005647	0.006828
205038_at	-0.005377	-0.00293	-0.002467	-0.002347	-0.002237	-0.007034	-0.001655	-0.001645	-0.001646	-0.008043	-0.00378	-0.001445	-0.001577	0.000626	-0.003401	-0.002411	0.000673	-0.000844	-0.00435	-0.001491	-0.003451	-0.001399	-0.004227	-0.001416	-0.002782	-0.000111	-0.0026	-0.003078	-0.001989	-0.003037	-0.001183	-0.002879	-0.001307	-0.001195	-0.000937	0.001427	-0.004552	-0.002575	-0.001483	-0.000454	-0.001555	9.2e-05	-0.002256	-0.003364	-0.005674	-0.001611	-0.001132	-0.001732	0.000668
205039_s_at	0.004138	-0.002964	-8.6e-05	0.001048	-6.2e-05	-0.002554	0.001617	0.001004	0.000869	-0.000651	0.000785	0.000982	0.001247	0.005243	0.000269	0.000919	0.001772	0.002261	0.000524	0.000486	0.000676	0.000895	-0.001107	0.003324	-0.000734	0.003538	-0.000445	0.00065	0.002282	0.000967	-0.00048	-0.002615	0.00019	-0.000339	0.00072	0.005859	0.000463	-0.000336	0.002609	0.001905	0.002253	0.003045	0.00287	0.000373	-3.6e-05	0.000332	0.002423	0.003411	0.006724
205049_s_at	0.003425	0.002952	0.000331	-0.001053	0.002511	-0.001079	-0.002524	0.00263	-0.000521	-0.00044	-0.000206	0.001533	-0.001	0.006093	0.002419	0.001855	-0.000158	0.002045	-0.005713	0.001396	0.001052	0.002833	-0.001413	0.001282	-0.0082	0.004876	-0.001478	0.00153	0.00113	0.000956	0.001079	0.00224	0.000615	0.003426	0.000312	0.008701	-0.002453	0.001928	0.004293	0.000393	-0.001218	0.00552	-0.000174	-0.000704	-4.4e-05	-0.006338	0.002203	0.005966	0.006296
205098_at	0.004395	0.002294	0.001864	0.005273	0.004428	0.003264	0.004611	0.00512	0.005692	0.000743	0.002983	0.002103	0.002989	0.00676	0.003564	0.001738	0.003622	0.003294	0.003341	0.004437	0.001296	0.002709	0.003307	0.005048	0.004681	0.007408	0.001663	0.002346	0.004836	0.00343	0.005686	0.001481	0.003617	0.007132	0.001947	0.0049	0.003967	0.002859	0.003876	0.003292	0.004466	0.007181	0.002755	0.004798	0.005163	0.004537	0.005915	0.006036	0.005644
205099_s_at	-0.001609	-0.001546	-0.001451	0.003896	0.000584	0.001002	0.003362	0.000257	0.0041	-0.00072	-0.000191	-0.000828	4.7e-05	0.000702	-0.000516	-0.000821	0.00057	0.000106	0.000955	0.002165	-0.002436	-0.002584	0.000462	0.003757	0.001722	0.003756	-0.001357	-0.001133	0.002151	0.000527	0.000681	-0.004298	-0.002076	0.001013	-4.4e-05	0.001045	0.000206	0.000686	0.001339	-0.000501	0.00155	0.002963	-0.002031	0.001051	0.000744	0.002642	0.001414	0.001359	0.003018
205147_x_at	0.000364	-0.000661	0.000501	0.002659	0.002054	0.001026	0.000687	0.003418	0.002248	-3.1e-05	0.000963	0.001858	0.000882	0.003372	0.001377	0.000689	0.001306	0.000442	0.001157	0.002569	-0.000222	0.000347	0.001142	0.001473	0.00067	0.004728	0.000324	0.001316	0.002068	0.000941	0.002383	0.001006	0.000527	0.002966	0.001145	0.004716	0.001909	0.000868	0.001922	0.001841	0.001467	0.003471	0.000291	0.002316	0.002147	0.001377	0.002119	0.005284	0.002778
205159_at	0.000851	0.001252	0.002031	0.003574	0.002949	0.001613	0.002267	0.006744	0.00597	0.001891	0.003248	0.002401	0.00082	0.006279	0.003036	0.001174	0.002828	0.004315	0.001414	0.004066	0.003095	0.003484	0.001955	0.004475	0.001166	0.007678	0.001651	0.001365	0.003445	0.003084	0.003441	0.001646	0.003405	0.004214	0.003363	0.007548	0.001725	0.00269	0.004886	0.003197	0.004018	0.005183	0.000919	0.00227	0.002827	0.002309	0.004613	0.005057	0.006716
205213_at	-0.008899	-0.008402	-0.008921	-0.00271	-0.002122	-0.012694	-0.003479	-0.000143	-0.009389	-0.008581	-0.004672	-0.003437	-0.008445	-0.007938	-0.00295	-0.007372	-0.002169	-0.001085	-0.009481	-0.007815	-0.008183	-0.005155	-0.008151	-0.003925	-0.011909	0.000676	-0.008254	-0.002035	-0.00624	-0.002647	-0.006294	-0.012852	-0.001635	-0.004117	-0.00899	0.004663	-0.010442	-0.007478	-0.001188	-0.008916	-0.007283	0.001222	-0.008021	-0.008496	-0.008263	-0.008577	-0.003018	-0.001224	0.000523
205267_at	-0.011767	-0.008594	-0.002003	-0.001042	0.002653	-0.004419	-0.002759	0.003149	1e-06	-0.00258	-0.00098	0.001211	-0.004417	0.005306	0.000165	-0.000384	-0.000657	0.000659	-0.002892	0.002197	-2.3e-05	0.002373	-0.005152	0.000725	-0.004792	0.007439	-0.001615	-3.4e-05	-0.001918	0.001131	0.000567	0.000741	0.001645	0.002523	-0.001223	0.008746	-0.011325	0.001065	0.003888	-0.000757	-0.001873	0.007032	-0.002025	0.000973	-0.00188	-0.007108	0.002736	0.006939	0.005665
205269_at	0.002931	0.000595	-0.002164	0.001196	0.000241	0.000258	0.000956	-0.000577	0.001509	-0.002142	0.000305	-0.001122	0.000448	0.001853	0.000354	-0.001804	0.002528	0.000748	-0.002384	-0.00056	-0.001992	0.000971	-7.8e-05	0.000842	-0.001594	0.003449	-0.001309	-0.000916	0.000861	-0.000924	0.000502	-0.001957	-0.000571	0.000907	-0.00108	0.003647	-0.001457	-0.000851	0.000738	-0.000327	0.001144	0.003381	-0.0011	-0.002002	0.000161	-0.001398	0.003025	0.001581	0.002616
205270_s_at	0.002388	0.003948	0.001233	0.003512	0.002829	0.003385	0.003149	0.003735	0.003443	0.001594	0.002377	0.002405	0.002581	0.004939	0.003654	0.003025	0.004473	0.003391	0.000675	0.002423	0.00209	0.003282	0.002618	0.004248	0.000888	0.00654	0.002112	0.001903	0.004769	0.002255	0.004113	0.000678	0.003208	0.005995	0.002699	0.006676	0.002308	0.001246	0.003543	0.002044	0.003572	0.006023	0.002323	0.001992	0.003241	0.002892	0.005719	0.004803	0.00543
205285_s_at	-0.000487	-0.003349	-0.002534	-2e-06	-0.00069	-0.003866	-0.001174	-0.000135	0.000568	-0.006403	-0.002649	-0.00376	-0.001753	9.8e-05	-0.000977	-0.001175	-0.001359	-0.000481	-0.00858	-0.001869	-0.002332	-7e-05	-0.003149	-0.001419	-0.004227	0.001283	-0.001567	-0.001795	-0.005475	-0.001626	-0.000711	-0.002099	-0.001408	-0.001423	-0.001879	0.001791	-0.007651	-0.007776	-0.000826	-0.001528	-0.001382	0.001407	-2e-06	-0.00161	-0.002478	-0.001317	0.001735	0.00176	0.001275
205291_at	0.002633	0.00293	0.002661	0.005051	0.002533	0.003318	0.003752	0.002769	0.001324	0.001933	0.002206	0.003327	0.000484	0.004696	0.000761	0.00357	0.003121	0.002459	0.002325	0.002485	0.001367	0.001471	0.001993	0.003174	0.002798	0.005074	0.001403	0.000583	0.001764	0.001799	0.001393	0.002192	0.003099	0.003442	0.004211	0.005974	0.002343	0.002187	0.003138	0.00494	0.003621	0.00449	0.002774	0.001462	0.002438	0.0011	0.004218	0.003973	0.004567
205312_at	-0.002901	-0.005275	-0.003978	0.001359	-0.00157	-0.003192	0.00083	-0.002962	-0.000259	-0.005049	-0.000693	-0.002644	-0.00072	-0.002261	-0.000246	-0.002551	0.001648	-0.001547	-0.001408	-0.004432	-0.003387	-0.001141	-0.001524	0.000166	-0.003833	0.000989	-0.002418	0.000136	0.002224	-0.001336	0.000655	-0.004148	-0.00162	-0.000178	-0.000922	0.001944	-0.00209	-0.002204	-0.002561	-0.002394	-0.002073	0.001785	-0.001589	-0.001525	-0.001388	0.000441	0.000277	-0.00105	-2.4e-05
205419_at	-0.000531	-0.003991	-0.00488	-0.002124	-0.001505	0.003053	-0.002279	0.002571	0.001813	-0.004719	-0.002612	-0.00114	-0.002031	0.000974	0.000285	-0.005379	0.000927	-0.000746	-0.010923	0.000583	-0.003578	-0.000341	-0.003474	-0.000294	-0.004013	0.000592	-0.004115	-0.002213	-0.000598	-0.00241	-0.001085	-0.001453	-0.001129	-0.001679	-0.0021	0.003862	-0.007973	-0.001743	1e-05	-0.001838	-0.002101	0.000681	-0.000604	-0.002318	-0.00189	-0.001716	0.001408	-0.001845	0.004082
205456_at	0.002636	0.00238	-0.00102	0.003264	0.003217	0.000502	0.002086	0.002957	0.000677	-0.000892	0.001204	0.001936	0.000814	0.004431	0.00239	-0.000273	0.00284	0.003271	0.001149	0.001287	0.000643	0.002674	0.000325	0.002056	-0.000917	0.004845	-0.000118	0.00087	0.001769	0.002235	0.003009	0.000151	0.002287	0.002344	0.002055	0.006363	-0.000182	0.00243	0.004262	0.001496	0.002062	0.005222	0.000121	0.001111	0.000436	0.001481	0.003976	0.004371	0.006374
205483_s_at	0.01205	0.013019	0.006093	0.016682	0.007974	0.009845	0.012387	0.007467	0.007981	0.00621	0.00689	0.011253	0.0148	0.012852	0.010553	0.008291	0.007464	0.007978	0.017014	0.004487	0.003374	0.011372	0.014123	0.008476	0.012183	0.014129	0.003851	0.007914	0.011075	0.013095	0.00824	0.003573	0.011656	0.015198	0.006898	0.008252	0.011981	0.006722	0.005374	0.00482	0.010094	0.011394	0.006093	0.006787	0.013829	0.007019	0.009324	0.012058	0.010312
205484_at	0.000738	-0.004895	-0.006544	-0.005611	-0.002933	-0.006175	-0.007263	-0.000414	-0.003868	-0.007562	-0.007622	-0.00575	-0.002265	-0.001567	-0.001931	-0.005204	0.000232	0.001645	-0.006933	-0.007983	-0.007814	-0.000973	-0.006449	-0.001269	-0.007576	7.7e-05	-0.007564	-0.00356	-0.006268	-0.001115	0.001078	-0.007116	-0.006788	-0.00116	-0.001395	0.00501	-0.008273	-0.006553	0.000394	-0.006059	-0.001817	-0.000411	-0.007326	-0.006384	-0.006514	-0.006628	-0.000823	-0.004506	0.003312
205488_at	0.000959	0.002383	-0.001591	0.000975	0.002086	-0.000988	-0.00129	0.000177	0.000723	-0.003584	-0.000995	0.001093	-0.00027	0.004067	0.000865	0.000286	0.001586	0.00151	-0.00069	-0.000585	-0.001809	0.001165	-0.000899	0.002328	-0.001394	0.000961	-0.002665	0.000244	-0.000554	0.000326	0.002518	-0.001271	0.001904	0.003295	-0.000759	0.004729	-0.002875	-0.000604	0.001449	0.001284	0.004297	0.004647	-0.001227	-0.000399	-0.001176	-0.000408	0.00192	0.002873	0.003542
205495_s_at	-0.004553	-0.001681	-0.00786	-0.000904	-0.001092	0.002993	-0.001006	-0.000703	-0.004079	-0.007598	-0.002528	-0.00152	-0.002744	-0.000405	-0.000934	-0.003174	0.001391	0.001577	-0.00098	-0.002875	-0.00397	-0.001859	-0.001873	-0.000548	-0.008617	0.001548	-0.003656	-0.002483	-0.002665	-0.000374	0.000147	-0.001037	0.001545	0.002883	-0.007176	0.004771	-0.003529	-0.002988	0.001682	-0.002048	0.004117	0.004596	-0.003551	-0.001601	0.000143	-0.003871	-0.00028	0.003663	0.001833
205504_at	-0.006405	-0.005489	-0.000643	-0.001667	-0.000578	-0.002136	-0.001006	0.000743	-0.002042	-0.001701	-0.00132	-0.003332	-0.001095	-0.003799	-0.000242	-0.00245	-0.001532	-0.000938	-0.00149	-0.000607	-0.003178	-0.000852	-0.001596	-0.001675	-0.00211	0.000185	-0.001125	-0.001216	-0.000399	-0.001022	-0.003463	-0.002163	-0.002217	-0.000684	-0.000926	0.003778	-0.004125	-0.001554	0.000232	-0.002117	-0.001353	0.001138	-0.001407	-0.000159	-0.002277	-0.002231	0.000974	-0.000142	0.000975
205552_s_at	0.00088	0.001641	0.000896	0.007548	-0.000171	0.000568	0.004462	0.001319	-0.001027	-0.000443	-0.000304	0.002862	0.006557	0.002241	0.00312	-0.000275	0.001711	0.001273	0.00647	0.000347	-0.00027	0.002843	0.007105	0.001036	0.002824	0.005297	-0.001396	-6.6e-05	0.00346	0.003461	0.000899	1.2e-05	0.002425	0.005882	-0.000124	0.001887	0.00125	0.000274	0.000456	-0.000502	0.003644	0.002762	-0.000121	0.001225	0.004464	6e-06	0.00252	0.003795	0.004593
205660_at	0.004976	0.004934	0.001093	0.005737	0.001415	0.001762	0.003019	0.001221	-0.001278	-0.00058	0.000792	0.002111	0.002688	0.003735	0.000999	0.000613	-0.000177	0.001648	0.004607	-0.001937	-0.001921	0.000597	0.003745	0.001426	0.003178	0.004338	-0.001016	0.000879	0.00132	0.003086	0.000866	-0.000969	0.003771	0.003389	-0.000528	0.000833	0.001741	0.001062	-0.000644	0.001249	0.003267	0.003504	0.000512	0.000677	0.002784	-9.1e-05	0.001067	0.002158	0.002132
205685_at	-0.000628	-0.002514	-0.003986	0.000647	-0.000654	-0.000998	0.000571	0.00029	-0.000164	-0.002915	-0.000564	-0.001936	-0.002188	0.001825	-3.9e-05	-0.001462	0.0001	-4.1e-05	-0.004144	0.000784	-0.002865	-0.001362	-5.2e-05	0.00085	-0.001774	0.00256	-0.001837	-0.001464	0.000635	0.000306	0.001286	-0.00393	-0.001231	0.00084	-0.001163	0.000568	-0.002011	-0.002283	-0.001074	-0.002386	-0.000103	0.001533	-0.001591	-0.000741	0.000288	-0.000484	0.000376	0.001737	0.00015
205686_s_at	-0.006609	-0.005364	-0.004989	0.001117	-0.000792	-0.000765	-0.00052	-0.000478	-0.00049	-0.000793	-0.000257	-0.002495	-0.000635	8.1e-05	-0.001898	-0.000912	-0.000292	-0.000309	-0.000469	-0.00044	-0.004055	-0.000803	0.000739	-0.000176	-0.001915	0.002794	-0.001104	-0.001041	-0.000842	-0.000769	-0.002805	-0.00194	-0.004313	0.00077	-0.001131	0.000471	-0.000542	-0.000765	-0.002535	-0.002178	8.3e-05	0.001161	0.000179	-0.001434	0.001733	-0.001071	0.0006	0.001156	0.000319
205692_s_at	-0.006197	-0.00874	-0.007081	-0.001898	0.000787	-0.003104	-0.000416	-0.000558	-0.008876	-0.010121	-0.0022	-0.003478	-0.006801	0.004712	-0.005174	-0.002766	-0.001677	0.001446	-0.006654	0.001476	-0.000745	-0.001134	-0.007659	-9.3e-05	-0.010226	0.006501	-0.002805	-0.009835	-0.001986	0.000871	0.000774	-0.001755	-0.001963	0.003781	-0.002996	0.005874	-0.003666	-0.001828	0.000691	-0.003515	0.001572	0.006914	-0.004448	-0.001278	-0.000539	-0.006106	0.003333	0.006431	0.003041
205718_at	-0.007123	-0.003771	-0.007801	-0.007177	-0.002554	-0.003513	-0.003512	-0.000102	-0.002263	-0.011838	-0.003572	-0.001054	-0.004837	0.00161	-0.000975	-0.005905	-0.001461	-0.002434	-0.010417	-0.009818	-0.007914	-0.006407	-0.007205	-0.000826	-0.002615	-0.000724	-0.008353	-0.004151	-0.00264	-0.002001	-0.004208	-0.004753	-0.002329	-0.001385	-0.006859	0.002564	-0.007185	-0.003658	-0.000362	-0.009326	-0.000814	0.001399	-0.006825	-0.005268	-0.001067	-0.005192	0.000324	0.002009	0.001242
205758_at	0.001621	-0.00118	-0.003316	0.003931	0.004327	-7.9e-05	0.000337	0.001201	0.001005	-0.006117	-0.00013	0.00027	0.002002	0.004589	0.002334	0.001947	0.002156	0.001388	0.001418	0.000407	-0.006306	0.002556	0.002278	0.000169	0.000648	0.002266	0.001206	0.002804	0.002176	0.001725	0.003486	-0.000527	0.002406	0.005298	0.002553	0.004992	-0.004528	0.001015	0.003478	0.002979	0.003871	0.005356	0.002404	0.001407	0.004102	0.001653	0.004216	0.002963	0.004423
205786_s_at	0.005948	0.000346	0.002573	0.004411	0.003517	0.00347	0.002939	0.003271	0.005235	0.001123	0.002755	0.00277	0.004529	0.004175	0.003438	0.003254	0.004873	0.003524	0.00161	0.004454	0.002166	0.001571	0.003474	0.004788	0.003056	0.005983	0.003249	0.003963	0.004769	0.002277	0.004041	0.002734	0.001584	0.003757	0.003826	0.004006	0.002175	0.001754	0.002674	0.003858	0.00392	0.005923	0.003083	0.004044	0.003403	0.004824	0.003407	0.005209	0.002466
205798_at	0.002761	-0.000283	0.00164	0.005177	0.004869	0.002052	0.004459	0.004051	0.006659	0.00146	0.003536	0.004919	0.001356	0.008507	0.002288	0.001286	0.003943	0.006186	0.000822	0.004104	0.003505	0.004908	-0.000493	0.005069	-0.000525	0.011657	0.000686	0.001933	0.003873	0.004691	0.004897	0.000404	0.002942	0.00479	0.003225	0.009011	-0.001744	0.00202	0.007545	0.003682	-0.000238	0.006906	0.003596	0.002391	-0.000215	0.002323	0.005858	0.004006	0.010046
205804_s_at	-0.008158	-0.011077	-0.00453	-0.001923	-0.000168	-0.009626	-0.001963	0.000337	-0.000855	-0.009323	-0.001828	-0.008284	-0.00286	-0.000611	-0.000268	-0.009267	-0.001331	0.000394	-0.010771	-0.003417	-0.004017	-0.000895	-0.005658	-0.000112	-0.011732	0.000153	-0.005701	-0.00198	-0.001599	-0.001289	-0.004769	-0.004971	-0.001357	-0.001918	-0.005953	0.004343	-0.010076	-0.00336	0.000525	-0.002452	-0.000162	-0.001563	-0.003341	-0.006408	-0.007569	-0.008771	-0.001355	-0.000188	0.001297
205821_at	-0.001391	-0.005692	-0.008415	0.001008	0.001536	-0.000886	-0.000487	0.002072	0.001674	-0.003092	0.00109	7.9e-05	0.000755	0.002607	0.001138	-4.6e-05	0.001194	0.002213	-0.002186	0.002005	0.000254	0.000972	-0.000122	0.000848	-0.004943	0.001825	-0.000603	0.000781	-0.000297	0.001032	0.002314	-0.001205	0.001523	0.001675	0.000648	0.003809	-0.002361	0.00175	0.002049	-0.000248	0.000509	0.002655	-0.002025	-0.000626	-0.000608	0.000767	0.002336	0.003187	0.001544
205831_at	0.003639	0.003909	0.000844	0.005734	0.004537	0.001057	0.004716	0.005958	0.003913	-0.000632	0.003479	0.004185	0.003418	0.007676	0.004667	0.002642	0.00564	0.005887	7.4e-05	0.004154	0.001895	0.005506	0.001289	0.005535	-0.000475	0.007704	0.001195	0.002781	0.003483	0.004324	0.005036	0.001244	0.005155	0.006148	0.002429	0.009621	6e-05	0.001506	0.006305	0.004263	0.004773	0.007987	0.003879	0.000708	0.002133	0.00066	0.006889	0.007496	0.008552
205859_at	0.006688	0.007221	0.005394	0.008078	0.006219	0.004615	0.005839	0.006259	0.005556	0.005178	0.005606	0.005062	0.005824	0.007471	0.00639	0.005549	0.007446	0.006166	0.004947	0.005262	0.004667	0.004652	0.005822	0.006258	0.005122	0.006937	0.004798	0.006851	0.006803	0.00552	0.006528	0.004724	0.006089	0.006656	0.006541	0.008347	0.00535	0.007136	0.005567	0.006341	0.003514	0.00656	0.006149	0.00695	0.004583	0.007097	0.006067	0.005555	0.00603
205885_s_at	-0.010784	-0.004173	-0.000662	-0.000562	-0.003387	-0.004023	-0.003692	-0.003197	-0.002936	-0.003774	-0.003728	-0.002576	-0.001455	-0.000736	-0.002339	-0.002628	-0.000634	-0.000701	-0.002824	-0.004853	-0.003782	-0.004236	-0.001061	0.000692	0.001229	0.000701	-0.003908	-0.001609	-3.4e-05	-0.002966	-0.000375	-0.00393	-0.003288	-0.001933	-0.003805	0.002075	-0.002657	-0.003422	-0.000738	-0.0033	-0.002806	0.000915	-0.002644	-0.003511	-0.002717	-0.003036	-0.001025	-0.00188	0.001123
205992_s_at	-0.002349	-0.004276	-0.001732	0.001725	0.001151	0.000783	-0.000812	-0.000538	0.000431	-0.004449	-0.000666	-0.001867	-0.002165	0.000905	0.000884	-4.9e-05	0.001265	-0.000825	-3.4e-05	-0.000794	-0.000878	0.001905	-0.000917	-0.000104	-0.003986	0.001977	-0.00069	-0.001577	-0.000513	-0.000263	-0.004509	-0.000448	0.000335	0.001574	-0.004654	0.003413	-0.003107	-0.000593	-5.1e-05	-0.003161	0.003614	0.003648	-0.002681	-0.000984	-0.000621	-0.001758	0.002989	0.001946	0.00105
205997_at	-0.004678	-0.008779	-0.002252	0.003155	0.001094	-0.008172	-0.000345	0.00104	0.000256	0.001137	0.000885	-0.000807	-0.000506	-0.003223	0.000958	-0.008688	0.001016	0.000253	-0.011764	-0.005782	-0.001415	0.000191	-0.000151	-0.000761	-0.004478	0.002992	-0.002197	0.001533	0.002899	-0.000499	-0.00481	0.002094	2.3e-05	-0.000643	3.7e-05	0.00393	-0.004383	9.8e-05	0.001257	-0.008835	-0.000284	0.001358	0.001206	-0.003054	-0.011218	-0.010029	0.002955	0.002543	0.002866
206011_at	-0.001631	-9.6e-05	-0.000507	0.002535	0.000588	-0.00244	0.000116	0.001695	0.00077	-0.00194	-4.2e-05	0.000219	0.001598	0.001908	0.001231	-0.001722	0.001917	0.000675	-0.000696	8.5e-05	-0.000601	0.000325	5.4e-05	0.000763	-0.000988	0.003018	0.001361	3e-06	0.000699	0.000448	0.000201	-0.000541	0.001291	0.002207	-0.000906	0.003731	-0.001597	-7.9e-05	0.001608	0.000239	0.002851	0.003042	0.00048	-0.000665	5.5e-05	0.000385	0.002365	0.000982	0.002593
206060_s_at	-0.002337	-0.009451	-0.005386	-0.00197	-0.001649	-0.003781	-0.003169	-0.002018	-0.000949	-0.010103	-0.002094	-0.003913	-0.002653	0.002443	-0.003073	-0.004311	-0.001712	-0.002887	-0.004615	-0.001443	-0.00604	-0.00237	-0.003358	-0.000514	-0.004398	0.001632	-0.003809	-0.005158	0.001381	-0.002945	-0.001151	-0.001228	-0.003859	0.000229	-0.003556	0.002465	-0.003318	-0.003704	-0.000806	-0.003099	-0.000438	0.000362	-0.004174	-0.003046	-0.004688	-0.001165	0.000703	0.000549	0.001217
206082_at	0.000379	-0.007797	-0.000488	0.004777	0.003294	-0.002309	0.000251	0.000653	0.000923	-0.003002	1.7e-05	-0.001233	0.003796	0.003799	-0.000297	0.00088	0.001079	0.00267	0.003825	-0.001243	-1.7e-05	0.004257	0.001977	0.002175	-0.000607	0.004525	0.000145	0.0014	0.003386	0.00438	0.001637	-0.00183	0.002942	0.000829	0.000674	0.005601	-0.005761	0.002554	0.003267	0.00211	0.002801	0.006087	-0.000517	-0.000957	0.001845	-0.000191	0.003574	0.00386	0.00404
206118_at	0.001454	0.000629	-0.000697	0.000873	0.000845	-0.00092	0.000773	0.001936	0.000766	0.00035	-0.00062	6.2e-05	-0.000572	0.001558	-0.000193	-0.000633	0.000241	0.001161	-0.000512	0.00153	-0.00095	0.000803	-0.000232	0.000189	-0.000967	0.002636	-0.001371	-0.001005	-0.001132	0.000566	0.001554	-0.000798	0.001447	0.001619	0.000208	0.004435	-0.00272	0.000529	0.000387	0.000411	0.000148	0.001527	0.000904	-0.000844	0.000742	-0.001145	0.002623	0.001591	0.004149
206133_at	0.003839	0.000239	-0.001447	0.004331	-0.000985	-0.000953	0.002375	-0.000182	-0.000459	-0.001166	0.002669	0.000865	0.002964	0.004228	0.002218	-3.5e-05	0.001307	0.000316	0.001549	0.001775	-8.4e-05	0.004408	0.003136	0.000249	-1.9e-05	0.004091	0.000488	8.2e-05	0.001456	0.002105	0.000636	0.000848	0.004374	0.004134	-0.000861	0.003836	0.000461	-0.000814	0.000663	-0.001431	0.005259	0.004773	0.000296	-0.001953	0.002352	-0.000555	0.003803	0.00179	0.003461
206134_at	-0.000245	-0.000879	-0.00373	0.002333	0.00463	-0.002304	0.000894	0.006636	0.00177	-0.003666	-0.000713	0.0019	-0.000104	0.009108	-0.003656	-0.002842	-0.000503	0.003335	0.001418	-0.003282	-0.004412	0.002374	-0.002651	0.004371	-0.001636	0.008263	0.000345	-0.000539	0.003664	0.003982	0.005061	-0.003762	0.000686	0.005013	-0.001796	0.007929	0.001027	-0.001996	0.003894	0.000981	0.005964	0.00457	0.001928	-0.001257	0.002123	-0.00319	0.007205	0.007171	0.004241
206150_at	0.001185	-0.004133	0.001364	0.002712	0.004123	-0.001109	0.001767	0.004489	0.001692	-0.000416	0.002042	0.00354	-0.000162	0.007054	0.00342	0.001849	0.003859	0.004333	-6e-06	0.003059	0.001061	0.004151	0.00012	0.003186	-0.000311	0.006932	-0.000594	0.002004	0.001427	0.002325	0.002889	0.001996	0.003524	0.003542	0.00224	0.007889	-0.003023	0.002145	0.005075	0.002602	0.002109	0.003402	-0.000365	0.001601	0.000519	-0.000541	0.004396	0.004136	0.006703
206181_at	-0.00475	-0.010117	-0.00286	-0.002092	-0.001393	-0.002409	-0.001505	-6.6e-05	-0.000595	-0.002642	-0.001901	-0.000288	-0.003941	0.001797	-0.001386	-0.001805	-0.001361	-0.000559	-0.000301	-0.000647	-0.002602	-0.001511	-0.001995	-0.001397	-0.004084	0.001675	-0.003132	-0.001985	-0.001652	-0.00108	-0.001421	-0.002773	-0.00069	-0.000629	-0.001711	0.003878	-0.00192	-0.002011	0.000512	-0.001056	-0.001226	0.002076	-0.00192	-0.002511	-0.002037	-0.001884	0.001087	0.00204	0.002517
206206_at	-0.006038	-0.007104	-0.00032	0.00036	0.001433	-0.000788	0.000533	0.001046	0.000635	-0.00176	-0.000449	-0.000342	-0.002572	-0.001707	0.001087	-0.001324	0.000286	-0.000689	-0.000126	-0.000307	-0.001066	-0.000339	-0.000916	0.00086	-0.000293	0.002732	-0.000853	-0.000213	-0.000702	-0.000336	-0.000483	-0.000881	-0.001812	0.000878	-0.000726	0.004947	-0.000206	0.000568	0.002553	-0.000999	0.000374	0.002366	-0.000148	0.000614	-0.000248	0.000218	0.001679	0.002691	0.002853
206219_s_at	-0.000552	-0.003211	-0.001454	0.000796	-0.000362	-0.003055	0.000262	0.00041	0.001448	8e-05	-0.000499	-0.000241	0.000541	-0.000477	0.000329	-0.000727	0.000424	0.00088	0.00119	-0.000782	-0.000675	0.000832	0.000335	0.000965	-0.002325	0.002141	-0.001655	0.000123	0.000475	-0.000227	0.001615	-0.001658	-0.000294	0.000802	-0.000469	0.003602	-0.000918	-0.002629	0.000359	-0.000696	-0.001283	0.002258	-0.00072	0.000477	-0.00022	0.000566	0.000286	0.002223	0.002238
206296_x_at	-0.005184	-0.005866	-0.010125	-0.008225	-0.004234	-0.009384	-0.004279	0.000274	-0.00621	-0.011146	-0.010852	-0.006964	-0.009514	0.000677	-0.001831	-0.004875	-0.001424	-0.002379	-0.007955	-0.006162	-0.007966	-0.00476	-0.009261	-0.004674	-0.011486	0.001472	-0.008859	-0.002545	-0.002724	-0.004843	-0.00652	-0.009832	-0.001473	-0.000756	-0.009375	0.003523	-0.00816	-0.007849	0.000225	-0.006344	-0.003803	0.000229	-0.008247	-0.010267	-0.010454	-0.011167	-0.000702	-0.001763	0.002725
206313_at	0.00357	-0.007805	-0.003089	8.1e-05	-0.001536	-0.001357	-0.001338	-0.000466	-0.002473	1e-06	-0.000493	-0.000913	3.2e-05	0.000273	-0.002274	-0.000834	0.001147	0.000727	-6e-05	-0.001793	-0.002698	-0.000253	-0.001367	0.000206	-0.002407	0.001961	-0.000985	-0.000533	-6.2e-05	-0.002216	0.001521	-0.001113	-0.002077	-7.3e-05	0.000246	0.001553	-0.000889	-0.000437	-0.000819	-0.002323	0.000194	0.001658	-0.000373	-0.001169	-0.000192	-0.00035	0.001352	0.000327	0.001013
206332_s_at	0.007183	0.005873	0.007459	0.009783	0.007661	0.007341	0.007968	0.008134	0.009234	0.006818	0.007461	0.006568	0.006703	0.008491	0.00727	0.006137	0.00793	0.006496	0.006489	0.007606	0.007486	0.008411	0.006544	0.007748	0.00854	0.009895	0.006835	0.007259	0.007203	0.006545	0.007479	0.00821	0.007468	0.007442	0.006859	0.009342	0.006982	0.00701	0.008177	0.007016	0.008915	0.009042	0.007525	0.00817	0.006187	0.007567	0.009664	0.008277	0.009506
206337_at	0.002904	-0.000331	-0.001878	0.000217	0.002019	-0.002674	0.000718	0.00292	0.000274	-0.002951	-0.000293	0.002331	-0.001023	0.003685	0.001464	-0.001128	0.000823	0.002138	-0.003974	0.000544	-0.002012	0.001756	-0.002245	0.000889	-0.004557	0.003184	-0.003205	-0.002317	0.000252	2.2e-05	0.000794	-0.004135	-0.00121	0.000646	-0.001263	0.007417	-0.003895	-0.001393	0.003283	0.000135	-0.000998	0.001752	-0.002056	-0.001474	-0.001001	-0.00241	0.002453	0.000901	0.006979
206369_s_at	-0.008759	-0.008249	-0.010421	-0.009545	-0.004811	-0.009183	-0.010048	-0.008567	-0.010965	-0.010706	-0.011132	-0.009312	-0.01057	-0.010533	-0.01033	-0.011058	-0.009573	-0.011136	-0.010433	-0.010806	-0.012411	-0.007836	-0.011016	-0.011851	-0.010577	-0.003317	-0.010688	-0.010154	-0.008273	-0.01166	-0.011012	-0.010113	-0.011249	-0.009617	-0.010435	-0.000153	-0.008513	-0.009374	-0.009659	-0.008517	-0.010323	-3.5e-05	-0.01125	-0.010341	-0.009309	-0.012475	-0.009411	-0.000391	-0.003599
206398_s_at	-0.002753	-0.0044	-0.002775	-0.003206	-0.001301	-0.002397	-0.004334	0.000436	-0.004389	-0.00456	-0.001969	-0.000455	-0.002102	-0.000289	-0.000595	-0.001262	-0.003011	-0.002019	-0.010955	-0.002787	-0.00232	-0.000711	-0.001907	-0.002557	-0.002572	-0.001446	-0.003174	-0.003948	-0.002169	-0.003043	-0.00272	-0.001564	-0.002988	-0.002025	-0.000865	0.006699	-0.003123	-0.001946	0.001117	-0.002742	-0.005236	-0.00029	-0.002365	-0.002987	-0.005417	-0.007901	0.000644	0.000953	0.003422
206478_at	-0.000639	-0.002615	-0.008508	-0.004449	-0.003095	-0.005928	-0.007366	-0.001143	-0.004768	-0.004616	-0.002747	-0.002854	-0.004301	-0.000325	-0.002242	-0.003055	-0.004542	-0.002431	-0.003443	-0.001733	-0.005127	-0.003325	-0.003315	-0.002878	-0.010617	0.0008	-0.005501	-0.004473	-0.003251	-0.003289	-0.003851	-0.00265	-0.003123	-0.004615	-0.003774	0.003883	-0.004834	-0.003674	-0.001123	-0.004547	-0.003517	-0.001583	-0.007166	-0.003773	-0.003327	-0.006802	-0.002568	0.001048	-0.000622
206486_at	-0.005744	-0.003091	-0.010746	-0.001255	-0.002914	-0.000617	-0.00181	-0.005845	-0.003956	-0.004421	-0.00455	-0.004758	-0.0092	-0.00277	-0.003286	-0.006717	-0.005594	-0.003959	-0.008667	-0.004239	-0.011164	-0.002594	-0.009543	-0.002062	-0.005849	-0.000395	-0.006767	-0.002715	-0.007511	-0.00332	-0.008533	-0.005967	-0.004007	0.001255	-0.007124	-0.001842	-0.003128	-0.01594	-0.003685	-0.006266	0.001169	0.001649	-0.007004	-0.011277	-0.002469	-0.004148	-0.001308	-0.000274	-0.000982
206503_x_at	-0.008018	-0.008633	-0.000962	-0.00078	-0.003018	-0.006926	-0.005589	-0.010324	-0.006395	-0.008038	-0.007658	-0.008002	0.000744	-0.001535	-0.00539	-0.007714	-0.004068	-0.0069	-0.005007	-0.002044	-0.003918	0.00095	-0.007717	-0.001573	-0.003756	0.001171	-0.009772	-0.002465	-0.005172	-0.002709	-0.006539	-0.002616	-0.001845	-0.000576	-0.006492	-0.00025	-0.005384	-0.008374	-0.002604	-0.008355	-0.000255	7.8e-05	-0.006966	-0.006523	-0.002795	-0.006338	-0.002631	-0.000642	-0.003406
206513_at	-0.000279	0.002769	-0.00257	-0.000475	0.000622	-0.003717	-0.000883	-0.000305	-0.002379	-0.011089	-0.004153	-0.000874	-0.00159	0.002754	-0.001049	-0.00091	-0.000881	0.000232	-0.00216	-0.001772	-0.002348	-0.000888	-0.001425	-0.001314	-0.002512	0.003436	-0.003568	-0.001334	-0.002111	-0.001576	0.001511	-0.003028	-0.001869	0.001841	-0.003222	0.003791	-0.002274	-0.001678	-0.000178	-0.001876	-0.000831	0.001805	-0.002249	-0.000947	0.001618	-0.003373	0.001415	0.002613	0.001617
206553_at	-0.002136	0.001319	0.00091	0.002824	0.000301	-0.001376	0.00188	-0.001512	-0.000919	0.000191	-0.00079	0.001328	0.002621	0.001281	0.000784	0.000222	-0.000515	0.000911	0.002924	-0.009138	-0.002424	0.000949	0.002767	-7.7e-05	0.000468	0.00328	-0.002019	0.000689	0.001758	0.00119	7.4e-05	-0.000823	0.001844	0.003771	-0.000293	0.000456	0.002259	8.6e-05	-0.001482	0.000801	0.000893	0.001283	-0.000755	-0.0004	0.002914	-0.000998	0.000251	0.00276	0.001811
206584_at	0.003226	0.001307	0.003746	0.00787	0.006136	0.006182	0.004834	0.006322	0.006477	0.004189	0.004255	0.003981	0.002397	0.006109	0.003323	0.003939	0.005571	0.005229	0.00199	0.006253	0.004306	0.005304	0.003621	0.005787	0.007428	0.008325	0.004313	0.00372	0.004808	0.003384	0.005491	0.004004	0.004743	0.005406	0.004055	0.007706	0.002875	0.00492	0.004915	0.003931	0.00421	0.007343	0.005729	0.005445	0.005309	0.005954	0.007045	0.006495	0.00639
206589_at	-0.005638	-0.005841	-0.009826	-0.010193	-0.010105	-0.00541	-0.009118	-0.009026	-0.007792	-0.010878	-0.010764	-0.012865	-0.011688	-0.005477	-0.00727	-0.013374	-0.00967	-0.006222	-0.009522	-0.012321	-0.012659	-0.008549	-0.009854	-0.007032	-0.009727	-0.00288	-0.012531	-0.012167	-0.010719	-0.008753	-0.011007	-0.010429	-0.009741	-0.005591	-0.011161	-0.002517	-0.009103	-0.006039	-0.003128	-0.011708	-0.009832	-0.003384	-0.009176	-0.00491	-0.008647	-0.011318	-0.005411	-0.004938	-0.009754
206641_at	-0.008491	-0.010373	-0.002584	-0.015194	-0.00301	-0.01481	-0.010313	-0.001125	-0.008053	-0.009665	-0.005489	-0.003943	-0.012542	0.000843	-0.005513	-0.013902	-0.002263	-0.002248	-0.012359	-0.000366	-0.001262	-0.002424	-0.010334	-0.003752	-0.007233	0.001849	-0.004583	-0.002558	-0.007164	-0.00305	-0.010956	-0.001635	-0.008116	-0.002677	-0.007449	0.003153	-0.015397	-0.001189	-0.000602	-0.004316	-0.006355	0.003009	-0.006501	-0.005664	-0.010959	-0.016398	-0.000483	0.000521	0.000301
206666_at	-0.002612	-0.002282	-0.000801	0.001777	0.003395	-0.001573	0.001094	0.002518	0.002079	-0.001134	0.002307	0.004346	0.000961	0.005116	0.003273	8e-05	0.004776	0.003747	-0.004293	0.001585	-0.003317	0.002111	-0.000398	0.003971	-0.002519	0.00261	-0.001444	0.001826	0.001236	0.000708	0.003982	-0.00052	0.004276	0.004637	0.003079	0.009786	-0.001921	0.001144	0.003239	0.003995	0.002012	0.006863	0.001024	-0.00025	-0.001383	-0.003897	0.004323	0.004322	0.008886
206687_s_at	0.004255	0.004009	0.003458	0.005769	0.003002	0.004146	0.004287	0.005927	0.004188	0.003095	0.003562	0.005457	0.00499	0.005938	0.005492	0.004578	0.005115	0.004804	0.00376	0.004633	0.003015	0.004218	0.003534	0.005135	0.003955	0.0042	0.002618	0.004679	0.006097	0.003343	0.004863	0.003049	0.004363	0.004263	0.003394	0.008906	0.005287	0.003712	0.005111	0.003649	0.003786	0.006362	0.003916	0.004159	0.003951	0.004213	0.004187	0.00659	0.006137
206715_at	-0.001267	0.000748	-0.002096	0.001824	0.000167	-0.001653	0.001426	0.000202	0.000139	-0.001822	0.000576	-0.000946	-0.000552	0.002718	0.000149	-0.001952	0.001442	0.002089	-0.001931	-0.000184	-0.003038	-0.001206	-0.000426	0.00099	-0.001413	0.00346	-0.002413	-0.001358	0.002081	-0.000175	0.001547	-0.002157	-0.000472	0.00284	-0.001976	0.002044	-0.000799	-0.001317	-0.000327	-0.001958	0.002198	0.003258	-0.001148	-0.002427	0.001302	-0.00109	0.003903	0.003103	-1.3e-05
206761_at	-0.007448	-0.009057	-0.00545	-0.002958	-0.003177	-0.00725	-0.003294	-0.001976	-0.005385	-0.012212	-0.004376	-0.003938	-0.005577	-0.00596	-0.003099	-0.004616	-0.003217	-0.002355	-0.013855	-0.004275	-0.009205	-0.003102	-0.004947	-0.00273	-0.003574	-0.001998	-0.005374	-0.003814	-0.004133	-0.004134	-0.002388	-0.005389	-0.006201	-0.002106	-0.005828	0.000557	-0.005524	-0.003981	-0.002296	-0.003688	-0.002771	-0.002118	-0.00473	-0.004445	-0.011944	-0.006836	-0.001914	-0.00098	-0.000599
206804_at	-0.005056	-0.005425	-0.010357	-0.0032	-0.002487	-0.008192	-0.005156	-0.007573	-0.00496	-0.009315	-0.009765	-0.002843	-0.00251	-0.003849	-0.007935	-0.006455	-0.010213	-0.00197	-0.009181	-0.003598	-0.006634	-0.00886	-0.009804	-0.000542	-0.007555	-0.000114	-0.009069	-0.008203	-0.009243	-0.008078	-0.008268	-0.010124	-0.009733	-0.007334	-0.004766	-6.7e-05	-0.009085	-0.008753	-0.001564	-0.007719	-0.00199	0.000618	-0.008425	-0.009047	-0.008404	-0.009392	-0.002099	1.6e-05	0.00161
206974_at	-0.002134	-0.002628	-0.002836	-0.000705	-0.001781	-0.0021	-0.001487	-0.002505	-0.000368	-0.005505	-0.003287	-0.002084	-0.003139	-0.000702	-0.001539	-0.0025	-0.001424	-0.001056	-0.000505	-0.002047	-0.005096	-0.002168	-0.003004	-0.001521	-0.002726	0.000233	-0.003677	-0.002143	-0.002012	-0.001783	-2.3e-05	-0.004177	-0.001106	3.7e-05	-0.002409	0.000263	-0.006689	-0.001365	-0.001536	-0.002155	0.000287	0.001781	-0.001308	-0.001021	-0.001315	-0.001569	0.00021	-0.000112	0.000412
206978_at	-0.000719	0.000398	0.000793	-2.1e-05	0.000915	-0.001486	0.000448	0.004199	0.001972	-0.001355	3.3e-05	0.001823	-0.000851	0.004513	0.001741	0.000894	0.00227	0.003261	-2.1e-05	0.001786	0.000435	0.002214	-0.000649	0.001353	-0.002165	0.00471	-0.000391	0.000859	0.000521	0.00151	0.001191	0.001064	0.00162	0.001384	0.001366	0.005704	-0.002135	0.00152	0.004329	0.001844	-0.001128	0.004452	-0.000481	0.000706	-0.000342	-0.000466	0.002819	0.0039	0.004528
206991_s_at	0.006378	0.003257	-0.002226	0.002163	0.00318	-0.000485	0.001278	0.000323	0.000413	-0.001524	3.4e-05	0.002478	0.000453	0.005654	0.00103	0.001499	0.003719	0.00235	-0.0001	0.002625	0.000306	0.002462	0.000636	0.00255	0.000357	0.00392	0.001066	0.001097	0.00231	0.001803	0.002699	-0.000108	0.002913	0.003155	0.002011	0.00464	0.000164	-0.000483	0.0009	0.001989	0.002729	0.005433	-3.5e-05	0.001108	0.001928	-0.000807	0.003568	0.004582	0.004246
207085_x_at	-0.007111	-0.007523	-0.009316	-0.008713	-0.003113	-0.009052	-0.001228	-0.002154	-0.00882	-0.007979	-0.000638	-0.008895	-0.001725	-0.00669	-0.001219	-0.006167	0.001138	-0.001401	-0.002946	-0.007758	-0.003361	-0.002053	-0.002138	0.00124	-0.008636	0.002099	-0.002984	9.3e-05	0.00041	-0.009215	-0.005075	-0.006554	-6.7e-05	-0.001277	0.000131	0.000556	-0.007907	-0.00644	-0.000452	-0.007783	-0.003377	-0.000153	-0.00205	-0.003618	-0.00876	-0.002916	0.000172	-0.003398	-0.000836
207104_x_at	-0.00532	-0.005667	-0.00647	-0.002229	-0.000708	-0.001426	0.001353	-0.000196	-0.00022	-0.006202	-0.001048	-0.002521	-0.000721	0.002475	-0.000983	-0.006323	0.001133	0.002687	-0.006503	-0.000757	-0.007122	-0.000857	-0.001981	-1.4e-05	-0.00169	0.004559	-0.004627	2.6e-05	-1e-05	-0.001986	0.000491	-0.008	-0.001891	0.001545	0.000157	0.002224	-0.001221	-0.008858	-0.000227	-0.006517	0.000151	0.00257	-0.001292	-0.001217	-0.001304	0.000105	0.002068	0.002336	0.001545
207224_s_at	-0.007852	-0.009832	-0.0011	-0.000778	-0.001709	-0.001017	-0.000786	-0.001386	-0.002175	-0.00337	-0.002664	-0.008421	-0.001524	-0.000305	-0.001205	-0.004317	-0.000804	-0.001343	0.000199	-0.002552	-0.003294	-0.001471	-0.002749	-0.000343	-0.001478	-0.000474	-0.004279	-0.004288	-0.001138	-0.002717	-0.001875	-0.002075	-0.001116	2.7e-05	-0.004532	-0.00098	-0.003215	-0.000919	-0.002053	-0.001838	-0.002657	0.000906	-0.003173	-0.000709	-0.002407	0.000182	-0.001025	-0.00098	0.000199
207238_s_at	0.002411	0.000467	0.002018	0.003659	0.004869	0.000349	0.004387	0.006235	0.005967	0.000158	0.003816	0.004174	0.002646	0.00706	0.005484	0.003405	0.006037	0.005104	-0.000125	0.004503	0.001822	0.003751	0.002608	0.006502	0.001093	0.007262	0.00089	0.003413	0.004744	0.003546	0.005563	0.002353	0.00474	0.006839	0.003446	0.009883	0.000762	0.001613	0.005539	0.003744	0.005189	0.006829	0.003735	0.003321	0.003535	0.002736	0.007304	0.007577	0.00844
207339_s_at	-0.000108	-0.003689	-0.000328	0.000114	0.003196	-0.001514	0.001834	0.004452	-0.000657	-0.002781	0.001106	0.002864	-0.000732	0.004905	0.002493	0.001729	0.001953	0.003192	-0.002444	0.00057	-5.8e-05	0.002856	-0.002102	0.003242	-0.002051	0.004437	0.000671	-0.000726	0.001878	0.001194	0.001414	-0.000291	0.000724	0.001529	0.001133	0.009321	-0.000385	-0.000276	0.004407	0.000265	0.00157	0.004005	-0.002423	-0.000129	-0.000171	-0.001847	0.003751	0.002473	0.006768
207351_s_at	0.001004	-0.001469	-0.001834	-0.000141	-0.002284	-0.001699	0.000404	-0.001776	-0.001172	-0.001743	-0.002566	-0.000166	-0.001027	-8e-05	-0.001745	-0.000981	-0.002214	-0.00033	-0.000195	-0.000289	-0.002814	-9e-06	-0.001915	-0.000619	-0.000381	0.000679	-0.00244	-0.001607	-0.001389	-0.003518	0.001619	-1.2e-05	0.000647	0.000407	0.0012	-0.000241	-0.002164	-0.001171	-0.002084	-0.001317	-0.001505	0.001153	-0.001162	-0.004003	-0.00071	-0.002195	0.000355	0.000121	-0.001123
207375_s_at	0.000634	-0.008818	0.000113	0.004262	0.003002	0.001894	0.002407	0.00229	0.003163	0.000846	0.000903	0.002289	0.00133	0.002953	0.00164	0.003403	0.002039	0.002059	-0.000812	0.000816	0.002032	0.001438	0.001868	0.002522	0.000864	0.005892	0.001022	0.001027	0.001886	0.00114	0.004239	0.001077	0.001376	0.00362	0.001314	0.002294	-0.000134	0.001857	0.003414	0.00218	0.004696	0.004326	0.002268	0.001779	0.004251	0.001495	0.003819	0.003606	0.003448
207419_s_at	-0.008321	-0.005023	-0.000867	-0.000416	0.000438	-0.003485	0.000738	0.001676	0.000433	9.3e-05	-0.000304	0.001457	0.000839	0.002224	0.000353	-0.000627	-0.000178	0.001267	-0.00399	0.000258	-0.000632	0.002917	0.000344	0.000898	-0.004327	0.00289	-0.00125	0.000194	0.002288	3.4e-05	0.001226	-0.000201	0.00099	0.001125	-8.9e-05	0.006823	-0.000135	-0.00155	0.00148	-9.1e-05	0.001527	0.002847	-0.001317	7.9e-05	-0.000415	-0.001664	0.001579	0.003138	0.005675
207536_s_at	-0.002456	-0.002696	-0.003836	0.00046	-0.002071	-0.002164	-0.001752	-0.002722	-0.005414	-0.002371	-0.004729	-0.004554	-0.003976	0.001653	-0.004405	-0.002853	-0.002545	-0.001259	-0.002503	-0.004883	-0.002532	-0.003533	-0.003837	-0.002368	-0.010384	0.000339	-0.003158	-0.005288	-0.000852	-0.002129	-0.001129	-0.003086	-0.003025	-0.001631	-0.002881	-0.001726	-0.011009	-0.00202	-0.004925	-0.003219	-0.003098	0.000552	-0.00231	-0.00441	-0.004118	-0.002952	0.000498	-0.001215	-0.001997
207540_s_at	-0.002562	-0.007719	0.000128	-0.000629	0.003283	0.000455	-0.000545	0.003218	0.00221	-0.007207	0.000421	0.001492	-0.001495	0.00463	0.000758	0.000816	0.002286	0.003376	5.5e-05	0.001395	0.000352	0.003528	0.001987	0.001145	-0.003799	0.003574	-0.001433	0.00084	0.001659	0.001574	0.001032	-0.003181	-2.6e-05	0.000566	-0.001589	0.004647	0.000124	0.001158	0.001392	-0.001183	0.000426	0.00304	-2.5e-05	0.002454	-0.002749	0.00143	0.001754	0.004614	0.002205
207571_x_at	0.002879	0.002439	0.000632	0.003056	0.005029	0.002367	0.002411	0.002975	0.003825	-0.001371	0.002044	0.001581	0.001679	0.005246	0.001587	0.000242	0.002101	0.002833	-0.000234	0.002446	0.000148	0.001506	0.000755	0.002421	0.000132	0.004871	0.00021	0.001677	0.002048	0.001673	0.003006	0.0003	0.002019	0.003171	0.002148	0.004009	0.000762	0.000871	0.002124	0.001079	0.002023	0.004347	0.001354	0.002609	0.004116	0.002048	0.003422	0.003622	0.004035
207610_s_at	0.000607	-0.004962	-0.003172	-0.002007	-0.001143	-0.003408	-0.002744	-0.002473	-0.000858	-0.002544	-0.003142	-0.003123	-0.001584	0.001169	-0.003617	-0.004476	-0.001513	-0.003803	-0.004718	-0.000891	-0.002953	-0.002566	-0.003782	-0.000574	-0.00307	0.001422	-0.004536	-0.003017	-4.3e-05	-0.003266	0.000816	-0.003835	-0.002548	0.001235	-0.003027	-0.001489	-0.002156	-0.002658	-0.003231	-0.001456	-0.002011	0.000226	-0.000812	-0.001631	-0.000568	-0.002723	-0.002063	0.00044	-0.002097
207651_at	-0.008615	-0.007388	-0.013654	-0.003598	-0.006096	-0.007943	-0.006276	-0.001318	-0.004405	-0.010353	-0.00475	-0.01131	-0.014045	-0.001633	-0.002947	-0.005773	-0.001321	-0.00302	-0.005337	-0.009595	-0.011959	-0.000341	-0.010842	-0.008268	-0.01072	-0.003727	-0.007538	-0.014694	-0.009055	-0.00409	-0.007236	-0.01045	-0.003418	-3.5e-05	-0.006393	0.002121	-0.009151	-0.014114	-0.002983	-0.010433	-0.000383	-0.003309	-0.005878	-0.005918	-0.010159	-0.010214	-0.000649	-0.000821	0.001687
207677_s_at	0.002156	-0.008562	-0.001538	0.001142	-0.001212	-0.002527	-0.000607	0.001048	0.000893	-0.002595	-0.000735	-0.001052	-0.000444	0.000825	-0.001023	-0.003058	-0.000955	-0.001246	-0.003368	0.002241	-0.001842	-0.001802	-0.000385	0.000363	-0.002496	0.003826	-0.002295	-0.00039	0.000557	-0.000222	0.000204	-0.00238	-0.003065	0.000392	-0.002135	0.003347	-0.001166	-0.002017	0.000118	-0.003049	-0.001267	0.002883	-0.001912	-0.00299	-0.002096	-0.000662	0.000108	0.001979	0.001178
207697_x_at	-0.002026	-0.002895	-0.001218	0.001065	0.000781	0.000168	0.000577	0.002145	0.003026	-0.00389	-0.00133	-5.5e-05	0.000603	0.004699	0.000389	-0.001266	0.000451	0.002465	-0.00213	0.000814	-0.001654	-0.002457	-0.001437	0.001558	-0.002545	0.003901	-0.003155	0.000197	0.002407	0.000774	0.003622	-0.002913	-0.004934	0.004023	0.001205	0.002932	5.1e-05	-0.002628	0.001012	-0.003501	0.001177	0.004139	-0.00052	0.002058	0.000897	-0.000388	0.001257	0.004179	0.002196
207734_at	0.000474	0.000735	-0.001951	-0.001609	-0.001947	-0.002441	-0.001176	-0.000699	-0.000456	-0.001666	-6.6e-05	0.000132	-0.002141	0.001184	-0.000282	-0.001041	-0.000306	-0.000228	-0.001012	0.000204	-0.001483	0.00086	-0.002704	0.000253	-0.000826	0.002737	-0.001364	-0.000924	-0.002693	-0.000539	-0.001659	-0.000599	-0.000551	-0.000362	-0.002775	0.002848	-0.003679	-0.001418	-0.001105	-0.003166	-0.001121	0.001725	-0.001767	-0.002253	-0.001186	-0.000795	0.002082	0.004538	0.002684
207777_s_at	-0.002801	-0.006264	-0.005581	-0.001135	-0.003974	-0.004046	-0.002131	-0.002356	-0.003673	-0.005427	-0.0044	-0.001895	-0.004025	-0.001686	-0.003015	-0.002926	-0.002558	-0.002787	-0.004415	-0.005964	-0.003846	-0.002679	-0.00341	-0.003507	-0.003371	-0.000835	-0.00485	-0.004862	-0.003432	-0.002488	-0.002108	-0.004569	-0.003561	-0.002759	-0.006895	0.002216	-0.005656	-0.003322	-0.001491	-0.003858	-0.002179	-0.000302	-0.003724	-0.003062	-0.003462	-0.007063	-0.000202	-0.000956	-0.000108
207794_at	-0.003934	-0.002729	-0.001936	-0.002163	-0.005268	-0.005191	-0.002512	-0.001539	-0.002528	-0.006102	-0.0023	-0.001018	-0.003685	0.00091	-0.002269	-0.00236	-0.001133	-0.000814	-0.003468	0.000395	-0.003673	0.000499	-0.004446	-0.002535	-0.004443	0.001217	-0.003801	-0.002085	-0.00349	-0.00123	-0.002625	-0.001745	-0.002868	-0.002361	-0.003051	0.002544	-0.004623	-0.002626	0.000361	-0.001557	-0.003193	0.001128	-0.003288	-0.002654	-0.000454	-0.003785	0.000415	0.000748	0.001433
207795_s_at	-4.7e-05	-0.00487	-0.001783	0.000751	0.000109	-0.00166	-0.000534	-0.001873	-0.001601	-0.008574	-0.000946	-0.000795	-0.001358	0.000619	-0.002873	-0.000495	-0.000337	-0.001768	-0.000302	-0.002232	-0.002806	0.000134	-0.001077	-0.00066	-0.002023	0.001278	-0.001115	-0.000757	-0.001044	-0.00228	-0.000339	-0.001864	-0.000789	0.00104	-0.003985	0.00107	-0.000512	-0.000852	0.001291	-0.000418	0.000969	0.000658	-0.002747	-0.00054	0.000929	0.000753	0.001228	0.001299	0.001113
207796_x_at	-0.000722	-0.006997	-0.007377	-0.002291	-0.000717	-0.001608	-0.002647	-0.003653	-0.008254	-0.005	-0.004724	-0.003792	-0.003966	-0.001311	-0.003042	-0.001186	-0.003037	-0.003107	-0.003998	-0.005045	-0.005968	-0.002237	-0.003086	-0.005963	-0.007132	9.1e-05	-0.004608	-0.003578	-0.003508	-0.003348	-0.001557	-0.004146	-0.002464	-0.000789	-0.005786	-0.000941	-0.001418	-0.002637	0.000581	-0.002188	-0.000953	0.001594	-0.001807	-0.001696	-0.002001	-0.007492	-0.000463	-0.001354	-0.001903
207957_s_at	-0.009035	-0.011365	-0.005885	-0.003499	-0.001135	-0.005369	-0.004666	0.00034	-0.001806	-0.004735	-0.002402	-0.002139	-0.002878	0.000676	-0.001006	-0.004705	-0.002736	-0.002248	-0.003546	-0.000892	-0.003464	5.8e-05	-0.005582	-0.000708	-0.015366	-0.001473	-0.004938	-0.004103	-0.002963	-0.001125	-0.001907	-0.003281	-0.003126	-0.002406	-0.005161	0.004845	-0.01283	-0.002886	0.000369	-0.001283	-0.002821	-0.001261	-0.003152	-0.001973	-0.005231	-0.00526	-0.000115	0.000581	0.002738
207992_s_at	0.001596	0.00204	0.001636	0.003742	0.003145	0.003786	0.001658	0.002467	0.000317	0.001015	0.001851	0.00159	0.002354	0.004399	0.001919	0.002099	0.002675	0.002048	0.002034	0.002754	0.000176	0.002108	0.000579	0.002771	0.002212	0.002864	0.001566	0.001345	0.003722	-7.8e-05	0.003684	0.002244	0.00233	0.002101	0.001547	0.002591	0.000216	0.002157	0.001371	0.002592	0.000892	0.003959	0.00216	0.000663	0.001886	0.00136	0.003119	0.003468	0.001834
208012_x_at	0.004451	3e-06	0.003916	0.007718	0.003844	0.003997	0.008013	0.00575	0.004527	0.002981	0.00372	0.006087	0.006636	0.004759	0.006566	0.006595	0.005612	0.004827	0.006032	0.005095	0.004166	0.006792	0.007975	0.004674	0.004853	0.007106	0.00404	0.005354	0.005284	0.007983	0.004392	0.00291	0.00627	0.008972	0.003975	0.00759	0.004515	0.003919	0.004966	0.004293	0.004711	0.0062	0.005225	0.005533	0.003916	0.004479	0.006594	0.006055	0.00717
208018_s_at	0.006216	0.004294	0.000656	0.003947	0.00344	0.000836	0.002942	0.003632	0.003171	0.001471	0.003531	0.001979	0.002636	0.004898	0.003086	0.001509	0.003538	0.002828	0.001799	0.003893	0.000947	0.002038	0.002051	0.005272	0.001041	0.006402	0.000894	0.002619	0.004033	0.002518	0.006484	0.000646	0.003851	0.005317	0.002288	0.004663	0.001451	0.00176	0.002952	0.002264	0.002359	0.005931	0.002378	0.002738	0.003624	0.003837	0.004357	0.005574	0.003602
208071_s_at	-0.002711	-0.00964	-0.00173	5.9e-05	0.000229	-0.002173	-0.000259	-0.000396	-4.9e-05	-0.001889	-0.000554	-0.001646	9.1e-05	-0.002283	0.000461	-0.003441	0.001283	0.000567	-0.007249	-0.000297	-0.001783	-0.000629	-0.000457	0.001701	-0.0014	0.001441	-0.001352	0.001515	0.00115	-0.001243	0.00103	-0.002729	-0.001264	0.002148	0.000538	0.001558	-0.000693	-0.004159	0.001039	-0.002555	-0.000375	0.001354	-0.001073	0.000993	-0.000905	0.000841	0.00137	0.003168	-0.000395
208130_s_at	-0.002001	0.00047	-0.002956	7.7e-05	-0.001191	-0.000727	-0.000492	0.000757	0.000211	-0.000769	-0.000368	-0.000847	0.000667	0.001699	-0.000944	-0.001441	0.001239	-0.000107	-0.001333	0.001021	-0.003309	-0.000524	-0.000299	0.000999	-0.00158	0.001763	-0.001588	0.001729	0.002288	-0.000565	0.000424	-0.00097	-0.000167	-0.000738	-0.000257	0.000768	-0.00013	-1.8e-05	0.001339	-0.00108	-0.000277	0.000687	0.00047	0.001395	-0.000952	0.001489	0.000631	0.000738	-0.000234
208146_s_at	0.002445	0.004411	0.003668	0.003619	0.003613	0.003125	0.002354	0.005143	0.006592	0.001069	0.003297	0.003502	0.003573	0.005622	0.003407	0.002155	0.005115	0.005093	0.002865	0.00622	0.003278	0.003974	0.002616	0.005843	0.002247	0.006186	0.002771	0.00236	0.004609	0.003977	0.004757	0.002382	0.00316	0.003744	0.003719	0.007159	0.002575	0.003214	0.006047	0.003306	0.003519	0.005135	0.004014	0.004081	0.002338	0.004589	0.006497	0.006814	0.00592
208296_x_at	0.007055	0.001632	0.004037	0.003934	0.005472	0.002721	0.005059	0.005315	0.003926	0.00311	0.004104	0.003908	0.001504	0.007145	0.004053	0.003734	0.00566	0.005001	0.002392	0.003681	0.00414	0.005422	0.004472	0.005277	0.002874	0.007322	0.004679	0.003111	0.004642	0.004047	0.00384	0.004366	0.003463	0.003609	0.002502	0.008247	0.000769	0.002956	0.005149	0.003892	0.005351	0.006634	0.001625	0.004429	0.002792	0.004873	0.006839	0.004814	0.006789
208306_x_at	0.018187	0.017331	0.014279	0.016786	0.014724	0.012581	0.015102	0.015965	0.015821	0.013097	0.014567	0.015858	0.0161	0.01941	0.015255	0.015903	0.016688	0.016567	0.013739	0.017006	0.013722	0.015777	0.015283	0.017837	0.013306	0.018808	0.014555	0.016401	0.015858	0.014422	0.017546	0.013649	0.017617	0.017511	0.016804	0.018151	0.012859	0.014843	0.016621	0.017089	0.014924	0.018172	0.016707	0.016375	0.016079	0.016429	0.016837	0.017727	0.016885
208436_s_at	0.002854	0.007072	0.003263	0.007686	0.003469	0.005544	0.005934	0.00627	0.00316	0.005646	0.005012	0.003811	0.007717	0.008198	0.005802	0.005422	0.004453	0.005928	0.006089	0.005414	0.004285	0.006638	0.00763	0.004483	0.005312	0.007774	0.002326	0.004245	0.006451	0.006956	0.003305	0.002288	0.007922	0.006207	0.006132	0.006778	0.003595	0.004075	0.004683	0.003805	0.007387	0.007381	0.004704	0.003305	0.004893	0.004793	0.003853	0.003936	0.006705
208438_s_at	0.001556	-0.003916	-0.00053	0.001411	0.000534	-2e-05	-0.000355	0.002622	-3.7e-05	-0.000333	-0.000426	0.000307	-0.001382	-0.001564	0.000396	0.000322	0.000377	0.000295	-0.002543	-0.002635	-0.001	-0.000304	-0.006109	0.000738	-0.00086	0.000909	-0.000641	0.000196	0.000698	-0.000819	0.0005	-0.002295	-0.000391	0.000499	-0.003602	0.002075	-0.00172	-0.000668	6.2e-05	-0.000883	-0.001544	0.000671	-0.001544	0.002813	-0.000885	0.001048	0.000583	0.000617	0.001369
208450_at	-0.009159	-0.008391	-0.007251	-0.005209	-0.003015	-0.012249	-0.003422	-0.001204	-0.004015	-0.010185	-0.005443	-0.000916	-0.010061	-0.006298	-0.006708	-0.00584	-0.002426	-0.004651	-0.009178	-0.011122	-0.010202	-0.003153	-0.008346	-0.00516	-0.014085	-0.001152	-0.013501	-0.014478	-0.004245	-0.004537	-0.011846	-0.014632	-0.006968	-0.005615	-0.001779	0.002635	-0.006597	-0.004637	-0.002839	-0.012617	-0.004342	-0.000151	-0.004973	-0.009381	-0.011345	-0.008786	-0.009888	-0.00066	0.004822
208594_x_at	-0.004727	-0.006421	6.9e-05	0.002656	-6.7e-05	-0.000832	0.000611	0.003579	0.000992	-0.000304	-0.000883	-2.4e-05	-0.000163	-4.5e-05	0.000801	0.000688	0.001603	0.001501	0.000657	-0.003001	-0.000392	0.000392	0.000858	0.000421	-0.001033	0.003805	-0.000926	0.000919	0.00122	0.00165	0.001665	-0.000267	0.001823	0.003238	0.000935	0.00278	0.001164	0.000212	0.00075	0.000871	0.001158	0.003006	0.00038	0.001203	0.001178	0.001466	0.002405	0.003014	0.002251
208602_x_at	-0.00622	-0.006325	-0.014279	-0.006115	-0.007802	-0.011587	-0.012092	-0.007092	-0.004367	-0.007379	-0.007731	-0.011781	-0.009958	-0.004462	-0.007302	-0.009027	-0.006348	-0.002989	-0.012892	-0.00811	-0.009982	-0.007687	-0.011857	-0.006322	-0.010202	-0.003925	-0.013724	-0.008503	-0.009626	-0.01006	-0.008882	-0.01413	-0.008902	-0.004085	-0.007421	0.002042	-0.008046	-0.008836	-0.002762	-0.006706	-0.007597	-0.005345	-0.010901	-0.01166	-0.009481	-0.009441	-0.003519	-0.003763	-0.000657
208729_x_at	0.017843	0.016285	0.012704	0.018802	0.01508	0.014043	0.014279	0.013246	0.012915	0.013772	0.012616	0.014376	0.016011	0.019514	0.013684	0.014487	0.014844	0.015418	0.016844	0.013856	0.011797	0.014276	0.014202	0.015499	0.013517	0.017072	0.01272	0.01424	0.015687	0.014789	0.015937	0.011575	0.015355	0.016163	0.01492	0.015766	0.012659	0.013761	0.015149	0.014835	0.01469	0.016495	0.012644	0.013722	0.017137	0.015422	0.014185	0.016662	0.015909
208812_x_at	0.02099	0.019287	0.015442	0.020267	0.016908	0.016781	0.016214	0.016137	0.016774	0.016439	0.01556	0.017031	0.017129	0.021164	0.016553	0.016925	0.016454	0.017023	0.018886	0.015746	0.015506	0.015754	0.016827	0.016494	0.015876	0.018457	0.0151	0.017272	0.017338	0.016872	0.017895	0.015105	0.016773	0.017661	0.017262	0.017163	0.016243	0.017094	0.016694	0.017	0.016013	0.017787	0.015605	0.016869	0.018369	0.018126	0.016258	0.017837	0.017018
208829_at	0.012435	0.012141	0.009799	0.01277	0.010147	0.009696	0.009343	0.009171	0.009963	0.008368	0.010164	0.010022	0.010711	0.013017	0.012179	0.010909	0.01129	0.010059	0.011991	0.009455	0.009928	0.008742	0.010892	0.010873	0.009373	0.011798	0.009487	0.00999	0.011717	0.011472	0.009476	0.008249	0.011584	0.011508	0.00943	0.011746	0.010492	0.011456	0.010441	0.01086	0.013426	0.012123	0.009615	0.00971	0.009616	0.010261	0.010776	0.011326	0.01128
208885_at	0.009163	0.009558	0.005584	0.006318	0.006346	0.006298	0.006019	0.008477	0.00741	0.002667	0.006491	0.006869	0.005071	0.008956	0.007199	0.005997	0.007828	0.007507	0.004969	0.006709	0.005145	0.007171	0.004148	0.009712	0.00681	0.009698	0.0052	0.006021	0.007027	0.006214	0.008455	0.00693	0.00687	0.008297	0.005518	0.011415	0.005387	0.005022	0.008151	0.005752	0.007395	0.009099	0.006083	0.007916	0.005339	0.006359	0.009598	0.00988	0.010039
208894_at	0.017843	0.015669	0.013582	0.016407	0.014414	0.012293	0.014294	0.01519	0.014947	0.012667	0.015262	0.014433	0.013361	0.017495	0.01479	0.013905	0.015608	0.016096	0.012256	0.014995	0.012607	0.014925	0.014645	0.015781	0.011555	0.017111	0.014453	0.014405	0.015024	0.01349	0.016695	0.013126	0.014834	0.016266	0.016479	0.017108	0.01258	0.014305	0.015837	0.015689	0.013952	0.016164	0.014239	0.014564	0.015798	0.015291	0.016038	0.01697	0.015659
208965_s_at	0.003506	-0.000427	0.003273	0.006078	0.004564	0.004769	0.004332	0.001745	0.006018	0.003025	0.004408	0.004559	0.002954	0.002984	0.001528	0.003298	0.003819	0.004036	0.00167	0.004305	0.002901	0.005534	0.002714	0.005272	0.005722	0.006992	0.003991	0.003235	0.003251	0.002881	0.003352	0.004748	0.002352	0.00256	0.003717	0.005948	0.000435	0.002195	0.005067	0.002871	0.007467	0.005389	0.004752	0.004736	0.003926	0.0036	0.006654	0.005038	0.007144
208966_x_at	0.008853	0.006976	0.007275	0.010559	0.008296	0.007837	0.007943	0.008683	0.009239	0.007626	0.007718	0.00751	0.006949	0.008356	0.008352	0.006733	0.008572	0.006813	0.005726	0.009094	0.007842	0.009319	0.006855	0.008403	0.009116	0.010147	0.00732	0.007384	0.00774	0.006745	0.00775	0.007936	0.007908	0.008146	0.007684	0.009954	0.00636	0.006644	0.008125	0.007289	0.009416	0.00859	0.008284	0.008694	0.007213	0.008859	0.010901	0.00806	0.009543
209040_s_at	-0.003307	-0.007125	0.005573	0.008748	0.00811	0.007315	0.004159	0.004613	0.005193	0.002033	0.003871	0.005543	0.009351	0.012309	0.007307	0.00645	0.007273	0.006002	0.008688	0.006682	0.005405	0.008629	0.007901	0.006309	0.005225	0.010129	0.005763	0.005915	0.008956	0.008134	0.004955	0.005447	0.006769	0.005685	0.005461	0.009518	0.003007	0.005089	0.007746	0.005005	0.009792	0.010444	0.00514	0.004306	0.005938	0.006481	0.007998	0.008755	0.008096
209083_at	0.000396	0.00053	0.002154	0.004142	0.004657	0.00112	0.004624	0.006401	0.004255	0.000908	0.004086	0.004736	0.004336	0.007101	0.00623	0.003745	0.005248	0.004722	-0.000346	0.003114	0.002159	0.004329	0.002693	0.005415	-0.00126	0.006968	0.001701	0.004433	0.005516	0.00321	0.00524	0.002127	0.004836	0.004903	0.003433	0.009857	0.000648	0.003185	0.005851	0.0032	0.004307	0.006634	0.003226	0.004049	0.00257	0.003895	0.005597	0.006336	0.008601
209124_at	0.010293	0.011234	0.008561	0.009724	0.008418	0.009024	0.007976	0.009501	0.009116	0.007338	0.00826	0.008526	0.009171	0.010542	0.009027	0.008976	0.009069	0.008433	0.008775	0.008927	0.008428	0.008354	0.009896	0.009027	0.008678	0.009206	0.007728	0.007615	0.008586	0.008391	0.008784	0.008499	0.009611	0.009012	0.007936	0.009747	0.008157	0.008043	0.009334	0.00961	0.007691	0.010208	0.008359	0.009071	0.009743	0.00905	0.008377	0.009382	0.009504
209138_x_at	0.004799	0.006848	0.01621	0.016058	0.018013	0.005379	0.01054	0.018002	0.014162	0.013278	0.014229	0.016119	0.006646	0.022384	0.013624	0.015752	0.015588	0.015738	0.011723	0.018976	0.017009	0.015231	0.01225	0.015934	0.00341	0.019416	0.014168	0.016538	0.013152	0.017609	0.01746	0.015486	0.01596	0.01928	0.015224	0.018645	0.004855	0.018299	0.018334	0.01635	0.013426	0.018767	0.012455	0.017468	0.015431	0.007168	0.017578	0.019973	0.017623
209140_x_at	0.020794	0.019244	0.01525	0.020293	0.017652	0.015953	0.016259	0.016807	0.016841	0.015978	0.015786	0.017803	0.017391	0.021053	0.017283	0.017887	0.016586	0.017179	0.019427	0.016426	0.015739	0.015659	0.01697	0.017335	0.015937	0.018387	0.015982	0.016952	0.017898	0.017167	0.019136	0.015334	0.017567	0.018613	0.017673	0.017607	0.016066	0.017403	0.017111	0.017165	0.016773	0.017407	0.016685	0.017024	0.018722	0.018233	0.016628	0.018627	0.01737
209166_s_at	0.006779	0.006012	0.007892	0.008273	0.006569	0.006352	0.006546	0.007148	0.00769	0.005299	0.005502	0.006799	0.006863	0.008978	0.006112	0.004597	0.006511	0.00733	0.006489	0.006283	0.005852	0.007585	0.005851	0.006803	0.007056	0.008341	0.005198	0.006973	0.008349	0.006011	0.008118	0.005833	0.006931	0.006145	0.005794	0.008131	0.003745	0.006294	0.006261	0.006363	0.00656	0.007959	0.006344	0.00614	0.00488	0.007116	0.007487	0.00805	0.006239
209312_x_at	0.019388	0.017509	0.014569	0.017808	0.015202	0.013332	0.015864	0.015955	0.015124	0.013556	0.015573	0.01546	0.0161	0.019944	0.015941	0.016054	0.016704	0.017015	0.013685	0.016274	0.014549	0.015716	0.015146	0.018068	0.013784	0.019109	0.01457	0.016044	0.016522	0.014741	0.016941	0.013985	0.017963	0.016725	0.016539	0.01798	0.014477	0.014092	0.016418	0.017374	0.014807	0.018336	0.016616	0.016364	0.016262	0.017288	0.017236	0.018167	0.016919
209374_s_at	-0.005864	-0.005336	0.005531	0.004081	0.010634	-0.002448	0.002867	0.005826	0.004455	0.001197	0.003082	0.007606	0.001103	0.0188	0.007168	0.004266	0.00871	0.012902	0.00294	0.012506	0.006404	0.010592	0.001683	0.008879	-0.00252	0.01487	0.001994	0.0063	0.005664	0.010638	0.009551	0.009753	0.005901	0.012412	0.004995	0.012705	-0.001184	0.009592	0.008164	0.007158	0.00192	0.014254	0.000764	0.00721	0.002534	0.00308	0.014655	0.014632	0.010628
209417_s_at	0.004247	0.00673	0.005645	0.00886	0.002999	0.004499	0.005526	0.002366	0.002494	0.003272	0.003344	0.007017	0.008874	0.007129	0.006974	0.005433	0.005485	0.004474	0.008475	0.004597	0.003707	0.005858	0.009843	0.005043	0.005624	0.007236	0.00308	0.00563	0.00692	0.006499	0.00401	0.003044	0.0073	0.006863	0.00462	0.005541	0.003627	0.006249	0.003894	0.005317	0.004646	0.007825	0.006753	0.004624	0.005898	0.00413	0.005114	0.007704	0.00549
209546_s_at	-0.004924	-0.005265	-0.000982	0.007132	0.002555	0.001658	0.001633	-0.000216	0.002421	-0.001473	0.000355	0.002252	0.000247	0.003429	0.001624	0.001761	0.003577	0.003202	0.000644	0.001674	0.00027	0.003292	0.001886	0.00182	0.000885	0.006527	0.000466	0.001414	0.004948	0.002069	0.003848	0.002116	0.001468	0.004798	-0.000443	0.002603	-0.001459	-0.000109	0.001953	0.001255	0.005368	0.006228	0.002655	0.001334	0.004294	0.002845	0.004312	0.003673	0.003182
209606_at	0.001045	-0.002087	-0.000547	-0.001384	0.001571	-0.000885	-0.000333	0.003424	0.002346	-0.001086	-0.001215	0.001103	-0.000388	0.003802	0.001775	0.000123	0.001928	0.000862	-0.003595	-0.001214	-0.001868	0.002123	-0.001766	0.003523	-0.001326	0.003725	-0.000735	0.000912	-0.000228	0.00089	-0.000504	-0.001741	0.002049	0.001975	-0.000775	0.006195	-0.002414	-0.000229	0.002301	-0.00111	0.000671	0.00582	0.001311	-0.000182	0.00046	0.001121	0.00225	0.004117	0.004345
209619_at	0.020915	0.018213	0.015063	0.01881	0.015728	0.013536	0.015649	0.016532	0.016294	0.014094	0.015521	0.015492	0.016458	0.019871	0.016335	0.016194	0.016841	0.017722	0.015069	0.01672	0.014636	0.015628	0.015939	0.017658	0.013958	0.018465	0.015689	0.016587	0.01693	0.01538	0.017434	0.013838	0.01694	0.017911	0.017215	0.018285	0.014548	0.016701	0.017364	0.017552	0.015425	0.018146	0.016369	0.016265	0.016449	0.017724	0.016892	0.018205	0.01712
209670_at	-0.004599	-0.004318	-0.00042	0.005219	0.00322	0.001928	0.003094	0.004975	0.004976	-0.001013	0.00295	0.004277	0.001969	0.00353	0.004791	0.002713	0.004094	0.003929	0.000646	0.001345	0.000953	0.004831	0.000254	0.003841	0.000135	0.006235	-0.001022	0.002055	0.002741	0.004506	0.002842	0.000123	0.002934	0.003316	0.002769	0.009529	-0.001134	-4e-06	0.004629	0.002722	0.004152	0.005551	-0.000415	0.001415	0.000393	0.002073	0.004333	0.004057	0.00784
209671_x_at	0.004689	0.001322	0.002517	0.00487	0.004088	0.002364	0.003269	0.005813	0.003464	0.001467	0.004501	0.004981	0.0025	0.006924	0.004252	0.003753	0.003699	0.007468	0.002579	0.006239	0.002798	0.005214	0.004646	0.005339	0.001845	0.008837	0.000786	0.001888	0.003243	0.003613	0.006539	0.00295	0.004281	0.004798	0.00367	0.011772	0.000976	0.003822	0.00699	0.003783	0.00493	0.007887	0.003162	0.003819	0.004985	0.003354	0.007299	0.005739	0.011251
209685_s_at	-0.0025	-0.000192	-0.001992	-0.001245	0.000449	-0.002677	-0.000603	0.002751	0.001614	-0.00371	0.000677	-0.000102	-0.002796	0.002438	0.001471	0.000164	0.000784	0.000617	-0.00231	0.001684	-0.000474	0.002604	-0.003458	0.000428	-0.003762	0.000974	-0.002369	-0.002862	-0.001714	-0.000951	-6.7e-05	-0.000791	0.000783	0.001063	-0.001795	0.006355	-0.00252	-0.001384	0.000528	-0.0009	0.000372	0.000658	0.000475	-0.000832	-0.002166	-0.00217	0.002463	0.003582	0.004298
209734_at	0.003983	0.004667	0.001271	0.003411	0.003313	0.002476	0.003014	0.003205	0.003475	0.000602	0.002013	0.002638	0.002569	0.004585	0.003291	0.002704	0.002759	0.003391	0.001867	0.00329	0.001047	0.001588	0.00212	0.003525	0.001595	0.004983	0.001633	0.001839	0.003394	0.001993	0.004451	0.001824	0.002725	0.004467	0.002837	0.005218	0.001886	0.002991	0.002028	0.002776	0.002495	0.004829	0.002273	0.003776	0.002332	0.003748	0.003213	0.005114	0.003865
209761_s_at	0.002808	0.002597	0.00385	0.007422	0.003485	0.002921	0.006341	0.003782	0.003705	0.002495	0.003681	0.004653	0.005555	0.004326	0.004707	0.00594	0.004157	0.004359	0.006038	0.005298	0.002599	0.006261	0.006855	0.003059	0.004982	0.00582	0.003451	0.003976	0.003959	0.005225	0.002448	0.003141	0.006275	0.007845	0.003678	0.00641	0.004654	0.003806	0.004422	0.003431	0.004484	0.004909	0.004451	0.004423	0.002852	0.00338	0.006176	0.005414	0.006421
209762_x_at	0.005883	0.003247	0.003567	0.007377	0.004354	0.004056	0.007013	0.005832	0.004132	0.003187	0.003513	0.006189	0.006207	0.005366	0.005742	0.00687	0.004583	0.004763	0.007076	0.003937	0.003294	0.006304	0.008025	0.004508	0.005217	0.006599	0.003225	0.005493	0.005598	0.007289	0.003254	0.0025	0.005994	0.00905	0.004706	0.007338	0.004531	0.004818	0.004244	0.004249	0.003836	0.005132	0.004544	0.005865	0.00465	0.004688	0.005712	0.00589	0.006288
209770_at	0.00365	0.005418	0.002392	0.005081	0.003878	0.003271	0.002937	0.002722	0.003227	0.002218	0.002716	0.004949	0.003598	0.005527	0.00338	0.004036	0.003126	0.004185	0.003573	0.004124	0.002762	0.004041	0.002881	0.003393	0.002622	0.004871	0.002452	0.003692	0.002526	0.003014	0.003963	0.003212	0.004422	0.004209	0.003251	0.007007	0.00163	0.004051	0.003669	0.003956	0.003709	0.006593	0.003711	0.002652	0.002941	0.002577	0.005064	0.004498	0.004178
209795_at	-0.004478	-0.004411	-0.003319	0.001631	-0.001043	-0.002102	-0.00101	6.8e-05	0.002086	-0.001712	0.000624	-0.000756	-0.002858	0.000719	-1.9e-05	-0.000901	0.002161	0.000735	-0.005213	0.002908	-0.001511	-0.000525	-0.001687	0.000306	-0.002821	0.00015	-0.003417	-0.000518	-2.2e-05	-0.002045	-0.001925	-0.002166	0.001049	0.000379	-0.002777	0.004077	-0.004657	0.001208	0.000712	0.000152	-0.000337	0.003042	0.001226	0.000222	-0.002887	-0.00126	0.00155	-0.001314	0.003166
209813_x_at	-0.005033	0.001823	-0.001084	-6.8e-05	0.001865	-0.008115	-0.00067	-0.007108	0.000469	0.001362	0.00068	0.007052	-0.003941	0.004456	0.0005	-0.000774	0.001098	7.4e-05	-0.010747	-0.00064	-0.004812	0.001411	-0.006412	-0.00052	-0.007431	0.001009	-0.000272	-0.002053	-9.2e-05	0.002737	-0.003606	-0.003021	0.001248	0.002643	-0.000935	0.004524	-0.008368	-0.001134	0.004549	0.001312	0.000838	0.003751	0.000149	-0.008368	-0.00283	-0.003242	0.001276	0.003084	0.003998
209827_s_at	0.003911	0.002929	0.000841	0.002696	0.002328	0.001579	0.002327	0.003323	0.002578	0.001599	0.002159	0.001694	0.001323	0.006535	0.00311	0.002174	0.003011	0.003445	0.000964	0.004154	0.001675	0.003423	0.001695	0.002519	0.001647	0.003519	-9.1e-05	0.001565	0.001716	0.001289	0.002115	0.00127	0.002807	0.002689	0.002626	0.006891	0.001409	0.002067	0.004133	0.001599	0.00093	0.003872	0.002208	0.00194	0.000387	0.002504	0.002884	0.003719	0.005913
209829_at	-0.010327	-0.005997	-0.002847	-0.00415	-0.001311	-0.001693	-0.002664	-0.000674	-0.003531	-0.007755	-0.00276	-0.0021	-0.003457	-0.002776	-0.001773	-0.002772	-0.002698	-0.002542	-0.005521	-0.002554	-0.003074	-0.001816	-0.004377	-0.002448	-0.004544	-0.001927	-0.004276	-0.003019	-0.003557	-0.002065	-0.004183	-0.004587	-0.008769	-0.004373	-0.004037	0.004117	-0.005977	-0.003341	-0.000429	-0.004014	-0.005785	-0.001395	-0.004805	-0.004445	-0.004707	-0.006416	-0.001548	-0.001055	0.00248
209879_at	0.000466	0.002131	-0.000355	0.004401	0.003724	0.001269	0.003207	0.005555	0.003878	0.001342	0.00323	0.002384	0.002952	0.004446	0.003714	0.003163	0.005243	0.003977	0.001159	0.002082	0.00109	0.002607	0.002833	0.002367	0.000698	0.005567	0.001288	0.003055	0.006212	0.001784	0.002507	0.001035	0.004047	0.004736	0.002357	0.006324	0.001263	0.003064	0.003512	0.002189	0.002008	0.005466	0.001745	0.002506	0.001626	0.003529	0.003592	0.004246	0.005821
209880_s_at	0.002892	-0.005115	-0.004904	-0.000748	-0.000445	-0.000865	-0.005196	-0.000553	-0.001753	-0.005703	-0.0018	-0.001896	-0.000502	-0.001831	-0.002128	-0.00084	0.001272	0.00067	-0.001931	-0.006228	-0.001343	-0.003315	-0.001609	-0.000413	-0.002124	0.001188	-0.006638	-0.001881	0.001337	-0.00221	-0.004668	-0.001642	-0.000353	0.000101	-0.000928	0.000857	-0.003308	-0.001013	-0.002038	-0.003278	-0.006378	0.001778	-0.001489	-0.000715	-0.002417	8.7e-05	-0.001009	0.000515	0.000795
209901_x_at	3.1e-05	-0.005044	0.005082	0.003702	0.004728	0.003212	0.004569	0.004861	0.005203	0.001795	0.005046	0.003206	0.00574	0.007411	0.00644	0.001907	0.007882	0.005992	-0.002386	0.005725	0.004375	0.003584	0.003969	0.005738	-0.002673	0.007174	0.00174	0.006407	0.00559	0.003274	0.005376	0.001412	0.004395	0.005556	0.005318	0.007445	0.001034	0.004608	0.005443	0.00402	0.004686	0.008408	0.005428	0.005819	0.00122	0.004793	0.006317	0.004295	0.006671
209949_at	0.004882	-0.004343	-0.000161	0.003134	0.001848	0.002908	0.002987	0.002743	0.001723	-0.001647	0.00027	-0.000442	0.000584	0.004225	0.00058	-0.000103	0.002393	0.001951	-0.001422	0.002407	-0.001399	0.002033	0.000984	0.004276	-0.000831	0.005679	0.001165	0.001894	0.000623	0.000641	0.003717	-0.000747	0.001496	0.003155	0.000571	0.003352	-0.001558	-0.000598	0.001657	0.000439	0.00034	0.005664	0.002039	0.00345	0.002865	0.003584	0.003033	0.005474	0.002471
209969_s_at	-0.000731	-0.006111	-0.002493	0.007716	0.004455	0.002772	0.004452	0.002366	0.000803	-0.002146	0.001799	0.002233	0.00518	0.006993	0.005726	0.002904	0.003205	0.005572	0.006238	-0.003131	0.000377	0.003667	0.005943	0.003472	0.000572	0.008739	-0.001215	-0.000315	0.003185	0.006727	0.005159	-0.001664	0.005452	0.009703	0.000904	0.00615	0.003297	-0.000711	0.004077	-0.000561	0.009242	0.007933	-0.000478	-0.003549	0.003089	-0.000668	0.008236	0.00782	0.005524
209970_x_at	0.005732	0.000628	0.003314	0.006753	0.004694	0.002906	0.005509	0.005236	0.004648	0.001425	0.003889	0.004844	0.007241	0.009032	0.005025	0.004023	0.0059	0.005326	0.003416	0.004253	0.003808	0.005273	0.004109	0.005066	0.002885	0.00741	0.005512	0.004565	0.005648	0.004653	0.005876	0.004348	0.005006	0.0065	0.003662	0.007579	0.002678	0.004847	0.00517	0.004095	0.007051	0.007042	0.004283	0.004699	0.004575	0.004631	0.00668	0.006236	0.006364
209995_s_at	-0.001557	-0.002646	-0.000754	-0.001606	-0.000375	-0.001197	-0.000218	0.002584	-8.8e-05	-0.002242	-0.000322	0.001021	-0.00205	0.002397	0.000203	-0.001958	-0.001517	0.000958	7.7e-05	-0.001814	-0.003444	0.002147	-0.000463	-0.001174	-0.00259	0.002986	-0.008516	-0.003669	-0.001701	0.000404	-0.000324	-0.002025	0.001128	-7.2e-05	-0.001007	0.008478	-0.003273	0.000387	0.001749	0.001226	0.000219	0.000425	-0.00215	-0.002047	-0.00032	-0.000144	0.00096	0.002255	0.00513
210001_s_at	0.000358	-0.001732	-0.001598	0.001206	-0.000992	-0.001994	-0.000259	0.000496	-0.000857	-0.001797	-0.00166	-0.000774	-0.000477	0.000345	-0.001089	-0.002834	-0.000231	-0.000898	-0.001063	-0.001421	-0.001945	-0.000662	-0.001269	-0.000938	-0.00321	0.002677	-0.001927	-0.001945	-0.000582	-0.001434	-0.001977	-0.001744	-0.000314	0.001385	-0.000478	0.000776	-0.00296	-0.001691	0.001099	-0.001615	0.000186	0.002195	-0.004384	-0.00082	0.000561	-0.001701	0.001066	0.001501	0.00069
210029_at	-0.000202	-0.007306	-0.002871	0.004427	0.00298	-0.001598	0.001291	0.000688	0.000309	-0.001868	-0.001403	0.001255	-0.000509	0.009613	0.001082	0.000918	0.001485	0.003002	-0.001465	-0.010932	-0.003397	0.001781	-3.1e-05	0.002424	-0.002426	0.007626	-0.005436	-0.001732	0.001847	0.001736	0.003438	-0.001644	-0.000702	0.006734	0.000816	0.004965	-0.000815	-0.001853	0.003208	0.000619	0.006503	0.008937	-0.000315	-0.001489	0.006171	-0.002845	0.005537	0.006931	0.004655
210031_at	-0.00396	-0.004575	-0.001643	0.00255	0.000966	-0.003042	0.001663	0.002434	0.001743	-0.007389	0.000373	0.00168	0.000576	0.004371	0.001627	-0.001551	0.000841	0.000548	-0.003008	0.000169	-0.002785	0.001347	-0.001623	0.001514	-0.002819	0.00361	-0.002841	-6e-05	-0.000467	-4.9e-05	0.000945	-0.001077	0.001144	0.00281	-0.000654	0.006473	-0.00442	-0.000502	0.002759	0.000636	0.001772	0.003122	-0.000159	0.000197	-0.000937	-0.003835	0.001208	0.002838	0.005986
210038_at	0.000846	-0.006844	-0.003295	0.000844	-0.000316	0.004417	-0.000203	0.000331	0.000556	-0.002945	-0.0003	-0.002401	-0.001981	0.001548	-0.000812	-0.000258	-0.000834	-0.000105	-0.003138	-0.000342	-0.000545	0.001135	-0.003455	-0.000661	-0.002122	0.001113	-0.001367	-0.003012	-0.000896	-0.00285	-0.00044	-0.002652	-0.001707	-0.000351	-0.001666	0.002803	-0.010118	-0.001617	0.001653	-0.001774	0.001262	0.001045	2.5e-05	-0.001333	-0.000823	-0.002225	0.000608	-0.000534	0.002384
210072_at	0.006771	-0.000401	0.005512	0.007329	0.008644	0.0035	0.004791	0.012165	0.00761	-0.00086	0.006102	0.009551	0.001586	0.011076	0.008728	0.005298	0.006002	0.007527	0.000766	0.005747	0.007411	0.00966	0.001428	0.006823	0.002882	0.008421	0.003812	0.005301	0.005812	0.007382	0.00751	0.004303	0.006814	0.002797	0.006635	0.015429	0.000291	0.008207	0.009971	0.006835	0.000482	0.007035	-8.4e-05	0.006204	-0.001338	0.001995	0.008351	0.006793	0.013192
210116_at	-0.008936	-0.008118	-0.005832	-0.001565	-0.001854	-0.009747	-0.003054	-0.001977	-0.003002	-0.013813	-0.002872	-0.001962	-0.004529	-0.000484	-0.000822	-0.004373	-0.002073	-0.001888	-0.005066	-0.003901	-0.005916	-0.001671	-0.011156	-0.001399	-0.006987	0.000351	-0.005698	-0.001833	-0.005302	-0.002275	-0.002987	-0.007637	-0.00198	-0.002891	-0.002881	0.003494	-0.011691	-0.006862	-0.000822	-0.00359	-0.001549	0.001075	-0.004454	-0.006589	-0.008366	-0.004793	-0.000801	0.000607	0.001691
210140_at	-0.001064	-0.004902	-0.000582	0.002609	0.002755	-0.004762	0.001538	0.0036	0.002671	-0.0023	0.000594	0.003023	-0.00136	0.001725	0.001103	-0.00012	0.00232	0.002401	0.000345	0.001049	0.000454	0.001675	0.001712	0.00227	-0.000124	0.002867	-0.001083	0.002346	0.001114	0.002141	0.002394	-0.006693	0.001867	0.004233	0.000847	0.00516	-0.006997	-0.002137	0.001972	-0.000212	0.003051	0.004257	0.000541	0.003099	-0.004955	0.001639	0.003044	0.004168	0.004363
210163_at	-0.001016	-0.011771	-0.006197	0.008569	-0.001196	-0.005436	0.001562	-0.002499	-0.002546	-0.006035	-0.00142	-0.001154	-0.002081	0.00499	0.000294	-0.002488	-0.000426	0.002562	-0.000714	-0.005928	-0.011273	-0.000978	-0.002421	-0.004636	-0.005915	0.006137	-0.006456	-0.005265	-0.001659	-0.000385	-0.000462	-0.00597	-0.00303	0.006858	-0.004144	-0.000159	-0.001954	-0.007822	-0.002307	-0.005055	0.003803	0.005094	-0.00469	-0.00794	0.005609	-0.006748	0.006043	0.007736	0.003349
210176_at	0.001705	-0.000277	-0.001691	0.00056	0.000629	-0.001212	-0.000458	-0.000761	0.000322	-0.002457	4e-05	-0.002349	0.00059	0.003287	-0.000389	-0.001143	0.001862	-0.000761	-0.002083	0.000306	-0.002207	0.000472	0.000499	0.001415	-0.000198	0.003387	-0.002467	0.00066	0.001525	-0.002567	0.000751	-0.00198	-0.000552	0.000743	-0.00013	0.000496	-0.0015	-0.00068	0.001198	-0.000989	-0.000189	0.002372	-0.001148	-0.001073	-0.000188	-0.000607	0.001151	0.000886	0.000503
210225_x_at	-0.006231	-0.005578	-0.00584	0.000634	-0.001288	-0.002625	-0.00039	-0.001454	-0.000568	-0.007739	-0.002573	-0.001587	-6.9e-05	-0.002709	-0.000453	-0.005287	0.001352	-0.000131	-0.005973	-0.003279	-0.006446	-0.001502	-0.002176	-0.000983	-0.00587	0.003979	-0.005921	0.000782	-0.000579	-0.000723	0.00203	-0.005202	-0.006432	0.003749	-0.000426	0.001645	-0.001004	-0.006544	-0.000585	-0.005819	0.000118	0.003006	0.001477	-0.000189	-0.00559	-0.000158	0.00105	0.002903	0.000115
210260_s_at	0.004829	-0.000899	0.005082	0.004334	0.005507	0.00251	0.006021	0.00571	0.005812	0.003769	0.006008	0.005188	0.003048	0.007793	0.003633	0.005147	0.007161	0.006624	0.002981	0.001919	0.005349	0.006076	0.005832	0.006528	0.003616	0.008411	0.005288	0.004765	0.005582	0.005746	0.005008	0.005137	0.001214	0.00639	0.004469	0.010656	0.001306	0.003594	0.007509	0.005783	0.00652	0.006583	0.004432	0.005969	0.004018	0.005051	0.008745	0.005425	0.009024
210279_at	-0.00795	-0.010383	-0.005424	-0.002843	-0.000811	-0.003961	-0.003222	-0.000682	-0.001503	-0.009616	-0.002685	0.000198	-0.005025	-0.000667	0.000645	-0.002955	0.00016	0.000516	-0.014031	-0.001611	-0.004737	0.002009	-0.003637	-0.001356	-0.004927	3.4e-05	-0.007478	-0.0027	-0.001218	-0.002043	-0.002204	-0.002329	-0.001683	-0.001919	-0.002673	0.007435	-0.0124	-0.004215	0.001682	-0.001147	-0.00198	-0.001069	-0.003099	-0.003613	-0.003519	-0.0077	0.002375	0.001066	0.004538
210321_at	-0.003922	-0.002912	-0.010765	-0.0036	-0.001905	-0.002785	-0.003722	-0.005684	-0.003553	-0.005749	-0.006361	-0.002975	-0.000774	-0.005799	-0.002054	-0.004603	-0.002418	-0.002915	-0.008807	-0.004968	-0.007992	-0.002917	-0.007627	-0.005583	-0.00737	-0.003371	-0.003241	-0.001466	-0.004854	-0.00618	-0.000764	-0.00439	-0.005739	0.002689	-0.00342	-0.00085	-0.009675	-0.006848	-0.009358	-0.005855	-0.001473	0.002336	-0.003849	-0.010927	-0.00919	-0.003571	-0.003028	3.1e-05	0.000586
210356_x_at	0.000122	-0.001402	6.1e-05	-0.001831	0.004553	-0.002225	-0.001325	0.00551	-0.00051	-0.00672	0.003269	0.005753	-0.003117	0.004431	0.006044	0.003667	0.000434	0.003189	-0.003214	0.000107	-0.000838	0.005755	-0.003703	0.004139	-0.002567	0.005022	0.000804	-0.000787	0.001724	0.000121	0.00032	0.004017	0.002631	-0.000211	0.002707	0.012639	-0.00414	0.001939	0.005559	0.000944	-0.002358	0.003068	-0.002949	0.000257	-0.001399	-0.004511	0.006325	0.005757	0.008682
210439_at	-0.00877	-0.009281	-0.015132	-0.011625	-0.012344	-0.010671	-0.009345	-0.006138	-0.009878	-0.011751	-0.013731	-0.006412	-0.012717	-0.007294	-0.011995	-0.01192	-0.013102	-0.005234	-0.011093	-0.012302	-0.014347	-0.013591	-0.012911	-0.013583	-0.014175	-0.002553	-0.015115	-0.013296	-0.013259	-0.013133	-0.013204	-0.014319	-0.012827	-0.009954	-0.013095	-0.001079	-0.012999	-0.014404	-0.012114	-0.013502	-0.003731	-0.003605	-0.011529	-0.013687	-0.010281	-0.011337	-0.005456	-0.010096	-0.003263
210448_s_at	-0.002752	-0.000309	-0.003295	-0.006355	0.000181	0.002196	-0.000554	0.001293	-0.000853	-0.007611	-0.000732	0.001345	-0.008208	0.000504	0.001128	-0.006601	-0.003253	0.000443	-0.007752	-0.005617	-0.002772	0.001532	-0.008204	-0.001199	-0.008276	0.000407	-0.007175	-0.002158	-0.001873	-0.004542	-0.005817	-0.001668	-0.002656	0.000514	-0.000659	0.005488	-0.006808	-0.002862	0.002185	-0.004011	-0.002859	0.001947	-0.003415	-0.001825	-0.007794	-0.008319	0.001276	0.002626	0.002937
210506_at	-0.006556	-0.004016	-0.010442	-0.006315	-0.004821	-0.010638	-0.006106	-0.003972	-0.010505	-0.013599	-0.011767	-0.010702	-0.010158	-0.010185	-0.005497	-0.00937	-0.010893	-0.002409	-0.008848	-0.009991	-0.010984	-0.004462	-0.009374	-0.004225	-0.012685	-0.002595	-0.011955	-0.005856	-0.005169	-0.00902	-0.012122	-0.007258	-0.008817	-0.007073	-0.011153	-0.001412	-0.010537	-0.004702	-0.005255	-0.006316	-0.004489	-0.003024	-0.006953	-0.013438	-0.009584	-0.010619	-0.002551	-0.002027	-0.001873
210514_x_at	0.011139	0.010088	0.009292	0.015039	0.011962	0.009006	0.007668	0.010026	0.007898	0.009516	0.009171	0.009392	0.011865	0.014423	0.008295	0.010068	0.009854	0.011645	0.010406	0.010115	0.00896	0.011087	0.009464	0.010929	0.009312	0.014129	0.010193	0.008792	0.008925	0.01072	0.010103	0.007334	0.01063	0.010887	0.008949	0.012374	0.006093	0.00882	0.010933	0.009052	0.011958	0.013581	0.009144	0.009595	0.01024	0.009408	0.011658	0.013275	0.010824
210606_x_at	-0.005517	-0.007901	-0.006608	-0.000949	0.001056	-0.000615	-0.003067	-0.004961	-0.001133	-0.003937	-0.001748	-0.001779	-0.00905	-0.001838	-0.003472	-0.001623	-0.001144	-0.001604	-0.001137	-0.004833	-0.002577	-0.000346	-0.001125	-0.001473	-0.002697	0.001257	-0.001547	-0.001106	-0.002433	-0.001509	-0.001552	-0.003386	-0.002014	0.000934	-0.00601	0.002187	-0.002899	-0.002549	0.001029	-0.001103	0.001048	0.001738	-0.00247	-0.00217	-0.000975	0.001271	0.002331	0.000658	0.000311
210629_x_at	0.002176	-0.000183	0.000637	0.004422	0.002268	0.000358	0.002353	0.003363	0.00081	0.000231	0.001608	0.003211	0.003472	0.004402	0.002818	0.002494	0.003885	0.003588	-0.000163	0.000329	0.000484	0.001713	0.001119	0.003421	0.000132	0.004536	0.001022	0.004367	0.004237	0.001751	0.004149	0.000172	0.002908	0.003187	0.002536	0.004238	0.000527	0.002435	0.003543	0.001553	0.001941	0.006434	0.001984	0.002441	0.002451	0.002856	0.002287	0.003076	0.00351
210644_s_at	0.006873	0.006104	0.004341	0.006777	0.006702	0.005572	0.006726	0.005724	0.00633	0.003738	0.005222	0.00372	0.005567	0.008258	0.005479	0.005053	0.007395	0.007338	0.004677	0.004729	0.002837	0.004844	0.004528	0.007065	0.004385	0.008583	0.003721	0.005668	0.006897	0.004065	0.006369	0.004322	0.005245	0.007259	0.004154	0.007351	0.004335	0.004963	0.005265	0.0045	0.004865	0.006413	0.005958	0.004319	0.005903	0.006787	0.007943	0.008396	0.005699
210784_x_at	-0.003504	-0.005734	-0.006494	0.00069	0.002354	-0.000182	-0.000237	0.001141	7.1e-05	-0.003695	-0.001701	-0.004944	-0.001409	0.000639	-0.001574	-0.003775	0.000422	0.001482	-0.00574	-0.000446	-0.003771	-0.000466	-0.006557	0.000179	-0.004139	0.004507	-0.002771	-0.000335	-9.6e-05	-0.003263	0.001444	-0.005103	-0.001411	0.002365	-0.00025	0.002456	-0.001238	-0.008581	0.000673	-0.001603	0.000814	0.002811	-0.004427	-0.000382	-0.000712	0.001225	0.001283	0.002358	0.000776
210785_s_at	0.002636	0.003991	1.7e-05	0.003168	0.004986	0.002557	0.002061	0.002754	0.004039	-0.000658	0.001695	0.000566	0.000413	0.004961	0.001679	-0.000275	0.002122	0.003179	-0.000117	0.003166	0.000323	0.001915	0.001033	0.002669	0.000352	0.006054	0.000753	0.002163	0.003401	0.001945	0.002429	-0.000379	0.002775	0.003184	0.001317	0.003854	0.001319	0.000116	0.001872	0.000462	0.00186	0.005574	0.000479	0.002335	0.003902	0.00204	0.003399	0.004136	0.004781
210786_s_at	0.001117	0.000557	6.1e-05	0.000915	0.001037	-0.000253	0.000982	0.001034	0.00193	0.000461	0.000916	0.001184	0.000885	0.002083	-0.00033	0.000279	0.00252	0.001683	5.6e-05	0.001103	0.000278	0.002881	-3.8e-05	0.001897	0.000352	0.002849	0.000794	0.000516	0.001133	6.3e-05	0.001354	0.001402	0.000987	0.001291	0.000636	0.00459	5e-06	0.000481	0.003868	0.001521	0.000982	0.002585	0.001024	0.001334	0.000588	0.001517	0.003326	0.001768	0.005307
210797_s_at	0.005721	0.00535	0.001456	0.006198	0.001048	0.002199	0.002757	9.9e-05	-0.001971	0.000596	0.001414	0.003077	0.004519	0.00358	0.002792	-0.000259	0.001448	0.001126	0.006579	-0.000401	-0.000858	0.003007	0.004894	0.003003	0.003717	0.005396	-0.00043	0.002493	0.002706	0.004375	0.003154	-0.001119	0.00538	0.003894	0.000947	0.002233	0.002654	-0.000124	0.001662	0.000481	0.004711	0.003597	0.002476	-0.000112	0.005031	0.00221	0.002197	0.003165	0.004293
210865_at	-0.004946	-0.005073	-0.004466	-0.001394	-0.00267	-0.006332	-0.004477	-0.003798	-0.003932	-0.004931	-0.002776	-0.002613	-0.002322	-2.9e-05	-0.003333	-0.004096	-0.002588	-0.002352	-0.002862	-0.003117	-0.002436	-0.003595	-0.003018	-0.003449	-0.004916	-0.002499	-0.004782	-0.003499	-0.004163	-0.003957	-0.001937	-0.004235	-0.005476	0.00011	-0.004511	-0.000805	-0.00302	-0.002303	-0.003801	-0.003303	-0.000429	-0.000762	-0.003793	-0.005137	-0.002559	-0.004148	-0.001566	-0.000844	-0.000893
210873_x_at	-0.002121	-0.008793	-0.005202	-0.001673	-0.004463	-0.003001	-0.000564	-0.008082	-0.005679	-0.003352	-0.004867	-0.003706	-0.0042	0.000397	-0.00659	-0.005773	-0.005176	-0.003803	-0.00436	-0.010938	-0.008864	-0.0039	-0.006828	-0.003324	-0.007098	0.000375	-0.010634	-0.011487	-0.003508	-0.001903	-0.006464	-0.010505	-0.00435	-0.000223	-0.01315	-0.002864	-0.009238	-0.010337	-0.004613	-0.005682	0.000582	-0.001589	-0.007901	-0.005477	0.000381	-0.006106	-0.001132	-0.00237	-0.002733
210889_s_at	0.000851	-0.006289	0.002513	0.001245	0.003857	0.00295	0.002607	0.004001	0.005644	0.001085	0.00252	0.001609	0.000874	0.004867	0.003118	0.000715	0.002917	0.001339	-0.001194	0.002762	0.001496	0.002133	0.00213	0.004549	0.003772	0.005801	0.002575	0.002984	0.00268	0.001972	0.001765	0.001204	0.001517	0.002384	0.000783	0.004598	0.000577	0.001019	0.003411	0.000206	0.001015	0.00551	0.003988	0.002269	0.002269	0.003219	0.001958	0.002375	0.002778
210895_s_at	0.00461	-0.004133	0.001563	0.003894	0.002631	0.002648	0.004079	0.003445	0.002775	-0.000565	0.003383	0.001623	0.002417	0.005341	0.002666	0.002306	0.00416	0.003491	0.002499	0.002765	-0.000158	0.003605	0.003484	0.004908	0.002551	0.007015	0.002426	0.003156	0.004456	0.002481	0.002987	0.00143	0.002876	0.005685	0.002224	0.005782	0.002546	0.002215	0.003476	0.002311	0.005047	0.006326	0.003301	0.003715	0.004256	0.00349	0.005816	0.005398	0.004423
210915_x_at	0.004595	0.006588	0.003039	0.006195	0.006585	0.002878	0.006226	0.008277	0.005564	0.000772	0.005118	0.006555	0.003692	0.010135	0.007428	0.004026	0.006516	0.007555	0.00294	0.00559	0.004461	0.007297	0.001718	0.006271	0.000683	0.010472	0.002597	0.00423	0.004907	0.006535	0.006668	0.002103	0.006456	0.006438	0.00494	0.012576	0.001039	0.004137	0.009303	0.00472	0.005174	0.010074	0.002739	0.003075	0.003543	0.003487	0.008121	0.009772	0.011092
210972_x_at	0.007308	0.003072	0.003591	0.006753	0.005517	0.004522	0.004971	0.005861	0.003537	0.002776	0.004011	0.005468	0.005414	0.007935	0.00696	0.003033	0.005266	0.007939	0.003606	0.00625	0.002984	0.006556	0.004517	0.007623	0.003025	0.009677	0.003	0.004679	0.003134	0.006432	0.005608	0.003021	0.007561	0.004446	0.003157	0.012151	0.002363	0.004419	0.00846	0.007055	0.004835	0.008531	0.005476	0.005097	0.005571	0.005523	0.007836	0.006331	0.011935
210982_s_at	0.019059	0.015559	0.014028	0.01569	0.014929	0.011888	0.014239	0.015208	0.014945	0.012358	0.015096	0.014723	0.014296	0.01832	0.015371	0.013924	0.015916	0.016117	0.011869	0.01532	0.012902	0.01432	0.014761	0.016446	0.012392	0.017404	0.014311	0.015085	0.015096	0.013742	0.017052	0.013163	0.01557	0.017193	0.016242	0.016835	0.012603	0.01395	0.015843	0.015349	0.01395	0.016752	0.01462	0.015415	0.015325	0.015189	0.015788	0.017045	0.015617
210992_x_at	-0.002003	-0.007812	0.00108	0.002936	0.001194	0.000941	0.00162	0.001313	0.003571	0.000736	0.002934	-0.001113	0.002203	0.001582	0.00251	-0.000267	0.00364	0.00321	-0.005989	0.003538	0.001121	0.002063	0.003155	0.004572	0.001489	0.003758	0.002042	0.002596	0.002843	0.00121	0.001396	0.00125	0.001614	0.003496	0.001758	0.001868	-0.000822	-0.000564	0.002309	0.001757	0.001651	0.005183	0.003013	0.001828	0.002412	0.003524	0.003336	0.003173	0.002015
211005_at	-0.001311	0.001245	-0.001154	0.000381	0.001607	-0.001306	0.00095	0.002126	0.000757	0.001036	0.000616	0.001629	-5.1e-05	0.00285	0.001903	-0.000933	0.002073	0.000744	-0.001286	0.00088	-0.000433	0.001095	-0.001261	0.001014	-0.001724	0.001295	-0.000952	0.000877	0.001046	0.00098	0.002061	5e-06	0.002174	0.00149	0.001028	0.004246	-0.003207	-0.00075	0.001929	0.001073	0.000677	0.001708	-7.5e-05	-0.001058	-0.000612	-0.001355	0.001756	0.001635	0.002198
211013_x_at	-0.005041	-0.007356	0.000916	0.002013	0.000784	-0.004589	-0.005269	-0.004803	-0.003515	-0.001285	-0.006364	-0.002921	0.000691	-0.001169	-0.000421	-0.006528	0.00013	-0.001428	-0.005883	-0.007232	-0.004208	0.001385	-0.003107	4e-05	-0.001148	0.002242	-0.004749	-0.001136	-0.001901	-0.003063	-0.006486	-0.001128	-0.000595	0.000245	-0.000746	-0.0012	-0.002352	-0.008021	-0.002651	-0.008227	0.002011	0.001213	-0.001871	-0.0051	0.000651	-0.001583	-0.001564	0.000934	-0.001903
211122_s_at	-0.000645	-0.0015	-0.002972	0.008172	-0.000425	-0.004311	0.002422	-0.002285	-0.000865	-0.007554	-0.000163	-0.002136	-0.001355	0.006725	0.001043	-0.000907	0.002215	0.003998	-0.000107	-0.004316	-0.007256	0.001645	0.000206	-0.000254	-0.005164	0.007483	-0.004642	-0.00493	-0.000532	0.000481	0.00148	-0.004816	-0.000443	0.007872	-0.000535	0.002342	-0.000994	-0.003422	-5.6e-05	-0.002346	0.005683	0.007209	-0.002176	-0.006846	0.006222	-0.003537	0.007596	0.007193	0.003555
211133_x_at	-0.007138	-0.005247	-0.001536	0.001994	0.000296	0.001054	-0.001495	0.000724	0.001475	-0.001353	0.000101	-0.000704	-0.000523	-0.003381	0.000173	-0.000543	0.000666	0.000686	-0.001704	-0.000208	-0.002414	-0.000142	-0.001233	0.000251	7.9e-05	0.003475	-0.001227	-0.001319	0.000218	-0.000747	0.001143	-0.000756	-0.001824	0.003319	0.000703	0.002179	-0.000999	-0.001809	0.000253	-0.000353	0.000123	0.001403	0.000236	0.001316	-0.002147	0.001555	0.002373	0.002054	0.000762
211135_x_at	-0.00475	-0.00762	-0.004255	0.000832	-0.000698	-0.001496	-0.000209	-0.002163	0.000396	-0.004858	-0.002752	-0.001804	-0.001224	-0.001761	-0.000608	-0.002189	-0.000622	-0.000841	-0.003092	-0.000454	-0.00604	-0.003035	-0.002704	-0.00131	-0.004718	0.003062	-0.002976	-0.000175	-0.000873	-0.001825	-0.00107	-0.006151	-0.005463	0.00115	-0.000884	-0.000357	-0.004673	-0.007798	-0.002029	-0.000867	-0.00082	0.003743	-0.001354	0.001074	-8.4e-05	2.2e-05	0.00174	0.002616	0.000114
211144_x_at	-0.000771	0.003728	0.000502	0.000653	0.00217	-0.001735	-0.000579	0.000587	0.002319	0.001145	0.001664	0.006114	-0.00171	0.00346	0.001941	0.000528	0.002463	-0.001544	-0.007766	0.001471	-0.001822	0.002149	-0.008549	0.000572	-0.007616	0.001883	-1e-05	-8.4e-05	0.001106	0.003569	0.001017	-0.001889	0.001966	0.003373	-0.000208	0.004196	-0.002094	-0.000426	0.004391	0.001457	0.00208	0.00439	0.001588	-0.000276	-0.001536	-0.001324	0.002573	0.003203	0.003646
211178_s_at	-0.005188	-0.007762	-0.002449	0.000524	-0.000204	-0.000958	-0.001129	-0.00085	0.00012	-0.001898	-0.000939	-0.000857	-0.001698	0.001174	-0.000105	-0.003449	0.000488	-0.001081	-0.002727	-0.003439	-0.002037	-0.001427	-0.002409	0.000608	-0.001502	0.001925	-0.001154	-0.000887	0.000564	-0.001394	0.000754	-0.001805	-0.000103	0.00025	-0.001755	0.00154	-0.000892	-0.001845	0.000866	-0.00206	-0.001978	0.00169	-0.001729	-0.000704	-0.002538	-0.000388	-0.000478	0.000405	0.000298
211209_x_at	-0.006601	-0.008399	-0.005877	-0.00814	-0.008838	-0.00359	-0.005596	-0.006082	-0.005476	-0.005757	-0.005391	-0.002334	-0.004119	-0.002712	-0.006159	-0.006056	-0.00472	-0.00234	-0.012208	-0.002597	-0.008273	-0.0044	-0.005629	-0.001327	-0.006121	-0.000562	-0.009933	-0.008493	-0.012082	-0.002117	-0.002325	-0.009997	-0.002179	-0.001801	-0.002702	0.000988	-0.009443	-0.009264	-0.00198	-0.003618	-0.002038	-0.001211	-0.003189	-0.005678	-0.007812	-0.008259	-0.000167	-0.0031	-9.9e-05
211211_x_at	-0.006136	-0.006289	-0.005725	-0.005097	-0.002403	-0.006679	-0.001938	-0.00349	-0.002783	-0.00346	-0.002944	-0.001342	-0.005523	-0.002375	-0.006879	-0.001556	-0.001823	-0.002163	-0.009697	-0.001894	-0.005534	-0.001929	-0.005508	-0.004065	-0.006987	0.000151	-0.003513	-0.004275	-0.006566	-0.002966	-0.002709	-0.003523	-0.002791	-0.001495	-0.002441	0.001381	-0.004301	-0.005818	-0.002498	-0.005501	-0.003213	-0.00047	-0.010504	-0.003822	-0.003019	-0.005286	-0.000164	-0.000744	0.001322
211286_x_at	-0.001528	-0.005471	-0.00216	-0.002023	-0.003753	-0.005191	-0.001946	-0.00157	-0.001149	-0.001894	-0.001729	-0.00161	-0.001914	-0.002022	-0.001773	-0.002283	0.001286	-0.002303	-0.003324	-0.001735	-0.002077	-0.001649	-0.002536	-0.000864	-0.004279	0.001473	-0.003407	-0.00243	0.000224	-0.003443	-0.002864	-0.003055	-0.001612	0.000328	-0.000738	0.000392	-0.004752	-0.001535	-3.2e-05	-0.001555	-0.003193	-0.000652	-0.001907	-0.001196	-0.002798	-0.00354	0.00015	-0.000997	-0.000539
211336_x_at	-0.002184	-0.005724	-0.000885	0.001843	0.00111	-0.000401	0.001894	0.001249	0.001642	-0.000897	-0.000156	-7.8e-05	0.000532	0.003517	-8.4e-05	-0.000597	0.002621	0.003826	-0.001031	0.000667	-0.003172	0.000863	0.000794	-0.000849	-0.000149	0.005297	-0.003057	0.002436	0.001055	0.000324	0.004149	-0.00271	-0.001099	0.00358	0.000776	0.00325	0.000671	-0.00146	0.001439	-0.000769	0.001327	0.004085	0.000282	0.001208	0.000965	0.001204	0.003198	0.004506	0.002099
211339_s_at	0.000579	-0.000605	-0.001969	0.000565	0.000952	-0.001134	0.000855	0.002328	0.001552	-0.002971	-9.2e-05	0.000935	-0.001596	0.002878	0.001891	-0.001313	0.000605	0.001574	-0.003819	0.001985	-0.002231	0.000501	-0.002846	0.001694	-0.002985	0.003577	-0.003174	-0.001634	-0.000576	0.001232	0.001293	-0.001912	0.001391	0.001752	-0.000794	0.006917	-0.001875	-0.001027	0.003244	0.000771	0.001426	0.003548	-0.000159	-0.00217	-0.002444	-0.003386	0.00209	0.002289	0.005524
211366_x_at	0.005736	0.003056	0.003876	0.00718	0.004816	0.003675	0.005406	0.00503	0.005158	0.003226	0.005495	0.005495	0.007258	0.008763	0.005237	0.004549	0.006127	0.005121	0.00403	0.004657	0.004654	0.005532	0.004926	0.006077	0.003492	0.008172	0.006129	0.005128	0.005753	0.004822	0.006182	0.005168	0.005649	0.006998	0.004776	0.008058	0.003147	0.004627	0.005748	0.005917	0.007051	0.007355	0.006027	0.004808	0.005771	0.005531	0.006573	0.007066	0.007177
211367_s_at	-0.00447	-0.002743	-0.001602	0.002088	-0.000152	0.000123	0.000651	-4e-06	-0.000158	-0.00152	-0.00105	-0.000569	0.003536	0.003802	-0.000321	-0.00087	0.001359	0.000278	-0.001806	-0.00036	-0.000287	0.000921	-0.000177	0.000636	-0.002036	0.003171	0.000661	-7.8e-05	0.000649	-0.000576	0.000542	-0.00126	0.000874	0.001328	0	0.002969	-0.000867	-0.000918	0.000428	-0.000479	0.003071	0.002616	0.00025	-0.000931	0.000624	0.000517	0.002404	0.001789	0.002018
211368_s_at	-0.000329	-0.006634	-0.000409	0.003686	0.000866	0.000281	0.002406	0.001808	0.001792	-0.002551	0.000413	0.000276	0.004847	0.006058	0.001767	0.000651	0.003358	0.002069	-0.00337	0.002417	0.000627	0.003189	0.000589	0.002282	-0.000902	0.004842	0.002527	0.00219	0.00265	0.00126	0.001214	0.001603	0.002251	0.002805	0.000694	0.00481	-0.00134	0.000502	0.002517	0.001283	0.004895	0.004639	0.001219	-0.000451	0.000282	0.001742	0.004594	0.003433	0.00405
211395_x_at	0.006624	0.001952	0.003298	0.004078	0.004349	0.002607	0.002977	0.004233	0.005147	0.003378	0.004929	0.004086	0.003739	0.005113	0.004428	0.003228	0.004379	0.005139	0.003092	0.004715	0.002605	0.00371	0.004725	0.006566	0.004113	0.007826	0.003329	0.003821	0.004459	0.003438	0.003611	0.003386	0.003104	0.005457	0.003188	0.004022	0.001848	0.003284	0.004193	0.003783	0.004708	0.00621	0.0051	0.004306	0.005782	0.005677	0.004777	0.005379	0.003847
211430_s_at	0.013312	0.011479	0.015356	0.018682	0.018366	0.012254	0.013799	0.017851	0.016002	0.015263	0.015978	0.017246	0.008067	0.022485	0.012164	0.015687	0.016378	0.017839	0.007117	0.014217	0.014716	0.015179	0.015251	0.017279	0.007146	0.020256	0.012442	0.018015	0.014344	0.018102	0.019676	0.015918	0.015628	0.019582	0.012543	0.019507	0.00564	0.018931	0.019115	0.018724	0.016302	0.01991	0.009365	0.018589	0.018172	0.004114	0.018247	0.020016	0.018666
211434_s_at	3.4e-05	-0.010174	-0.009388	-0.002486	-0.003461	-0.005366	-0.001439	-0.002184	-0.003443	-0.00535	-0.004099	-0.00192	-0.003169	-0.005059	-0.00488	-0.006013	-0.003503	-0.004446	-0.006232	-0.009579	-0.010522	-0.002745	-0.007782	-0.005379	-0.005254	-0.001589	-0.004375	-0.002745	-0.004321	-0.007241	-0.002665	-0.005707	-0.005643	-0.001632	-0.005791	-0.001691	-0.001871	-0.00439	-0.01043	-0.006731	-0.00232	-0.003818	-0.003671	-0.003953	-0.002364	-0.002207	-0.002111	-0.00182	-0.006202
211469_s_at	0.000954	-0.001756	-0.012742	-0.003811	-0.004086	-0.011186	-0.004062	-0.002519	-0.00445	-0.00439	-0.00414	-0.00575	-0.006774	0.001288	-0.005174	-0.003699	-0.005587	-0.003314	-0.012638	-0.002343	-0.00738	-0.003518	-0.007213	-0.001777	-0.004705	0.001169	-0.007408	-0.010261	-0.004589	-0.002894	-0.002144	-0.007524	-0.004841	-6.6e-05	-0.002586	-0.00011	-0.005724	-0.004831	-0.003587	-0.003716	0.000193	-0.000875	-0.004318	-0.004792	-0.003251	-0.004263	-0.000353	0.002218	-0.001086
211528_x_at	0.017389	0.014119	0.012747	0.017618	0.014164	0.012699	0.01345	0.012671	0.013505	0.012369	0.01245	0.014053	0.015498	0.018212	0.014428	0.013622	0.013774	0.014581	0.01495	0.013268	0.012148	0.013252	0.014482	0.014335	0.012249	0.015559	0.01216	0.013961	0.014229	0.014944	0.015644	0.011764	0.014481	0.0153	0.013826	0.015146	0.011807	0.013936	0.014404	0.014269	0.014834	0.015835	0.012599	0.013377	0.015827	0.014187	0.013921	0.015851	0.014407
211529_x_at	0.016758	0.014464	0.01212	0.018298	0.013967	0.013008	0.013377	0.012067	0.012442	0.012209	0.012315	0.012093	0.014314	0.018294	0.013768	0.013802	0.013741	0.014412	0.014848	0.012569	0.011322	0.013447	0.013594	0.014378	0.012101	0.015704	0.012266	0.012897	0.013865	0.013724	0.013935	0.010804	0.013796	0.014792	0.013522	0.014594	0.011636	0.012629	0.013189	0.013463	0.013895	0.01574	0.011085	0.012361	0.016081	0.013378	0.013266	0.015607	0.014172
211530_x_at	0.008086	0.008843	0.007163	0.011503	0.008798	0.007413	0.007856	0.007103	0.006787	0.007696	0.006548	0.007897	0.009161	0.012438	0.007044	0.008946	0.007887	0.009058	0.009789	0.007581	0.006273	0.007826	0.008468	0.009052	0.007045	0.011871	0.006863	0.006858	0.011203	0.008183	0.009032	0.005917	0.007996	0.0083	0.007819	0.008856	0.006852	0.00814	0.008422	0.008547	0.007863	0.014542	0.006242	0.00752	0.010907	0.008862	0.007421	0.008909	0.011413
211557_x_at	-0.006458	0.002486	0.000277	0.002366	0.001502	-0.000634	0.00154	-0.000656	0.002952	0.000902	0.000361	0.000375	0.001468	0.001662	0.002357	0.000461	0.002769	0.003453	0.002249	0.003815	0.000437	0.000993	0.000553	0.004169	-6.1e-05	0.006566	2.7e-05	0.002101	0.003312	-0.0006	0.002856	0.000148	0.000119	0.003104	0.002762	0.003807	0.002242	0.000892	0.002849	0.00159	0.001624	0.004529	0.002547	0.002648	0.001699	0.003811	0.003229	0.004236	0.002124
211581_x_at	0.00135	0.001929	0.001256	0.002079	0.001559	0.000403	0.001355	0.002464	0.00051	0.000324	0.000914	0.002405	0.001246	0.002908	0.002726	0.001631	0.002234	0.002216	-0.000112	0.001467	0.000185	-0.000231	0.001392	0.001525	-0.001901	0.003395	-0.000799	0.00234	0.002782	0.001066	0.002694	-0.000982	0.001739	0.003496	0.00074	0.002575	-0.000761	0.00245	0.001374	0.000431	0.001051	0.004259	0.000328	0.001969	0.002218	0.000531	0.002254	0.002876	0.002024
211582_x_at	-0.002238	-0.000613	0.001295	0.003232	0.0019	-0.000356	0.002266	0.002459	0.00135	-0.000121	0.001765	0.002638	0.001696	0.000887	0.003302	0.002652	0.003592	0.003112	-0.00014	0.000677	-0.001187	0.001311	0.002055	0.002233	-0.001252	0.004018	-0.000886	0.003646	0.003827	0.001154	0.004141	0.000211	0.002635	0.003859	0.002169	0.004001	0.00063	0.003435	0.003512	0.002213	0.001341	0.006169	0.001903	0.001889	0.001965	0.002897	0.003281	0.004509	0.003012
211633_x_at	-0.005044	-6.4e-05	0.001554	0.001049	0.004832	-0.003065	-0.003894	0.002548	0.001333	9e-06	0.002557	0.003523	-0.00805	0.010855	0.000523	0.002219	0.003016	0.000802	-0.002682	0.00337	0.002118	0.003035	0.001497	0.002682	-0.010287	0.011592	0.001277	0.003547	0.000956	0.00313	0.002422	0.003415	0.002004	0.002208	0.002118	0.007477	-0.001665	0.001971	0.008958	0.001598	0.003763	0.016988	-0.00231	0.003297	0.003052	-0.008755	0.004981	0.015034	0.006974
211634_x_at	-0.008404	-0.009366	0.004703	0.00807	0.003852	-0.000976	-0.001652	0.00488	0.001048	0.001978	0.005785	0.005527	-0.001126	0.012919	0.002829	0.002818	0.004254	0.003673	-0.004866	0.006459	0.003203	0.002748	0.003484	0.005081	-0.004364	0.016086	0.001707	0.005529	0.004869	0.004203	0.007253	0.005991	0.002052	0.005344	0.003519	0.013877	-0.004072	0.004836	0.014876	0.005906	0.004875	0.015951	0.001059	0.006742	0.006532	-0.003579	0.011084	0.016962	0.010234
211635_x_at	-0.008113	-0.008182	0.003212	0.006985	0.000672	-0.001946	-0.001896	0.002793	-0.000806	-0.000133	0.001794	0.002027	-0.002399	0.010176	0.001091	0.001568	0.002695	0.00158	-0.00039	0.004588	0.001154	0.002068	0.000916	0.004725	-0.007933	0.016466	9.6e-05	0.003085	0.003513	0.002991	0.004596	0.005368	0.001464	0.003674	0.001612	0.014108	-0.003147	0.00329	0.014829	0.004516	0.001232	0.014963	-0.001133	0.004292	0.003754	-0.002689	0.008627	0.017021	0.008351
211637_x_at	-0.0071	-0.002205	0.005504	0.005894	0.008878	-0.00322	0.002504	0.009065	0.002257	0.004125	0.002503	0.006237	-0.007194	0.018929	0.003856	0.00508	0.006471	0.005843	0.000761	0.007356	0.005139	0.006874	-0.004338	0.006951	-0.00448	0.015315	0.001708	0.005501	0.001618	0.008255	0.006411	0.005797	0.005306	0.005521	0.004958	0.010451	-0.003671	0.008002	0.010541	0.003769	0.004332	0.015687	0.002262	0.007405	0.005587	-0.002395	0.005704	0.01618	0.010578
211639_x_at	-0.003986	-0.006467	0.000594	0.000756	0.004471	-0.011312	-0.004926	0.003822	-0.008953	-0.004743	-0.006224	-0.000945	-0.010173	0.011089	-0.005505	-0.006331	0.00076	0.001609	-0.001826	0.003573	-0.003704	0.001481	-0.003684	0.002728	-0.008773	0.011912	-0.002364	0.000651	-0.004074	0.002822	0.001951	0.000394	-0.001977	0.00149	-0.001189	0.006607	-0.00651	0.003658	0.003123	0.000957	-0.002327	0.009692	-0.005529	0.001505	-0.001784	-0.010418	0.001845	0.006922	0.005952
211640_x_at	-0.00798	-0.009789	0.000291	0.000953	-0.000971	-0.002234	-0.003264	-0.001317	-0.004714	-0.00406	-8.4e-05	-0.000535	-0.007821	0.005154	-0.001746	-0.002542	-0.000471	-0.002382	-0.005921	0.003034	0.000369	-0.001796	-0.003808	0.000868	-0.010118	0.009607	-0.00247	0.000974	-0.000599	0.000179	0.001567	-0.000984	-0.004897	-0.004378	-0.001066	0.00507	-0.009954	0.000221	0.004788	-0.001252	0.0019	0.011394	-0.009836	0.000328	0.001279	-0.004396	0.000535	0.00682	0.004129
211641_x_at	0.002738	0.001962	0.004901	0.002289	0.003533	-5.8e-05	-0.001552	0.008699	0.000558	0.001311	0.000113	0.003392	-0.001498	0.010972	0.00052	0.005376	0.001614	0.004325	-0.002058	0.004743	0.003831	0.005124	0.000901	0.002965	-0.000982	0.011481	0.001519	0.004095	0.001113	0.006147	0.004813	0.005147	0.001267	0.005895	0.001233	0.009353	-0.003313	0.003798	0.004242	0.00079	0.00219	0.016672	1.5e-05	0.004201	0.00508	-0.001706	0.004558	0.010955	0.008367
211643_x_at	-0.005502	-0.00439	0.005781	0.006102	0.009316	-0.000512	0.002574	0.008701	0.002585	0.004956	0.005393	0.005699	0.00107	0.015776	0.003706	0.004551	0.007887	0.007596	0.001954	0.00754	0.006027	0.006435	0.004214	0.006722	0.000478	0.016851	0.005314	0.006498	0.004298	0.006368	0.007114	0.006154	0.004865	0.007159	0.004102	0.014344	3.6e-05	0.00839	0.012857	0.005961	0.003155	0.017029	0.001608	0.007678	0.005166	-0.003054	0.009518	0.013715	0.012315
211644_x_at	-0.004697	-0.005222	0.010688	0.007446	0.014711	-0.002885	0.004741	0.01073	0.00613	0.007588	0.009713	0.01007	-0.000184	0.020497	0.004814	0.006398	0.009963	0.011269	0.001314	0.011724	0.009166	0.010728	0.006312	0.010053	-0.009732	0.017404	0.009251	0.011992	0.008026	0.01309	0.011177	0.00882	0.00955	0.010362	0.008894	0.016714	-0.007069	0.012815	0.016539	0.008581	0.007208	0.017692	0.004233	0.012401	0.0066	0.001654	0.012504	0.019197	0.016538
211645_x_at	-0.00645	-0.003746	0.008657	0.009679	0.010028	-0.002511	0.001896	0.012109	0.00847	0.005129	0.005967	0.011237	-0.001169	0.018885	0.006167	0.006692	0.008414	0.011669	0.00229	0.010704	0.008312	0.009386	0.006351	0.008311	-0.004499	0.016591	0.007538	0.010774	0.005931	0.012027	0.011146	0.010581	0.008867	0.012371	0.007296	0.014541	-0.004288	0.010746	0.011297	0.007828	0.00661	0.014352	0.003889	0.011676	0.009681	0.00109	0.015644	0.017126	0.014882
211647_x_at	-0.009084	-0.008313	-0.002277	-0.001479	-0.003485	-0.002818	-0.006311	-0.004152	-0.003694	-0.001782	-0.00172	-0.001724	-0.012152	0.00134	-0.00378	-0.003133	-0.000966	-0.003906	-0.003584	0.000783	-0.002814	-0.004772	-0.004211	-0.003056	-0.008395	0.001789	-0.003947	-0.003144	-0.001671	-0.004139	-0.00035	-0.002037	-0.006591	-0.005777	-0.003303	-0.000159	-0.005988	-0.003362	-0.000572	-0.002333	-0.001939	-0.00142	-0.002658	-0.000846	-0.000602	-0.002822	-0.00226	-0.000904	-0.00146
211649_x_at	-0.004682	-0.006058	-0.000754	-0.000842	0.001292	-0.009394	-0.003537	0.002348	-0.001461	-0.007374	-0.000361	0.001425	-0.005343	0.007398	-0.001621	-0.001361	0.000229	9.2e-05	-0.007828	-0.000694	3.8e-05	0.002086	0.001441	0.00023	-0.008794	0.007517	-0.001937	0.001029	-0.00151	0.000704	0.000302	0.001046	0.002839	-0.001653	0.002208	0.006639	-0.009622	0.001212	0.005136	0.002213	-0.000499	0.013666	-0.00817	-0.005865	0.000695	-0.007625	0.002699	0.009823	0.003182
211650_x_at	-0.00806	-0.007406	0.005485	0.003232	0.007743	-0.011528	-0.000518	0.002843	0.001231	0.001638	0.002807	0.001366	-0.00558	0.014347	0.000881	0.002926	0.003037	0.007584	-0.006235	0.004668	0.002511	0.002748	-7e-05	0.003107	-0.009761	0.011509	0.000198	0.004519	0.002424	0.007487	0.003893	0.002282	0.003163	0.006866	0.003732	0.008131	-0.007675	0.00379	0.00844	0.003334	0.002742	0.009468	-0.000737	0.004209	0.003403	-0.00622	0.005675	0.013545	0.011097
211655_at	-0.001456	-0.002531	-0.005995	-0.001555	-0.007969	-0.007268	-0.008501	-0.003017	-0.006218	-0.0081	-0.004537	-0.00751	-0.008704	0.003827	-0.00535	-0.004581	-0.006175	-0.006112	-0.006278	-0.00384	-0.005018	-0.00564	-0.004554	-0.003966	-0.01255	0.000773	-0.006734	-0.005318	-0.008609	-0.003921	-0.001174	-0.003601	-0.007011	-0.003741	-0.00385	-0.00547	-0.009214	-0.005923	-0.006351	-0.00344	-0.008853	-0.006023	-0.006455	-0.004223	-0.004488	-0.008486	-0.008003	0.002283	-0.002131
211661_x_at	0.003238	0.001927	0.001508	0.003086	0.001419	0.001517	0.001748	0.003679	0.002445	-0.000748	0.002187	0.001192	0.002176	0.003757	0.002503	0.002456	0.003707	0.002055	0.003211	0.003733	0.001868	0.00301	0.003748	0.001812	0.00043	0.004892	0.0011	0.0019	0.002446	0.000733	0.004169	0.000845	0.002105	0.00475	0.002159	0.003586	0.0016	0.0029	0.001856	0.002175	0.002692	0.003756	0.00224	0.00236	0.002509	0.00119	0.003952	0.004944	0.003516
211742_s_at	0.002384	-0.000579	0.001446	0.003969	0.003541	0.001113	0.003119	0.005019	0.00332	-0.000668	0.003253	0.002228	0.002446	0.005262	0.003028	0.00208	0.005329	0.003064	-0.000598	0.003329	0.001164	0.004785	0.001836	0.003772	0.000514	0.005708	0.001596	0.003618	0.004499	0.001459	0.001433	0.00266	0.002133	0.002092	0.003053	0.008462	0.000365	0.002908	0.004329	0.002463	0.002595	0.006036	0.00169	0.001122	0.001902	0.002539	0.006046	0.004144	0.006773
211795_s_at	-0.003025	-0.001887	-0.002836	0.000313	0.000195	-0.001237	0.000334	-0.000554	0.000873	-0.003491	0.001609	-0.000718	-0.000332	0.001407	-0.00015	-0.000158	0.002283	0.001288	-0.003335	-0.00029	-0.001652	0.000313	-0.000392	0.001374	-0.002575	0.002742	-0.002205	-0.000228	0.002177	-0.000559	0.001475	-0.001919	-0.000814	0.000872	-0.000852	0.004235	-0.003621	-0.002502	-0.000166	-0.00128	0.001637	0.002285	-0.000278	-0.000221	-5e-05	-0.000345	0.003367	0.002211	0.003542
211796_s_at	0.005392	0.005603	0.003415	0.00551	0.005751	0.002147	0.005144	0.006816	0.004554	-0.000929	0.004361	0.006759	0.004277	0.00876	0.005947	0.003918	0.00588	0.006396	-0.001691	0.005119	0.002654	0.006651	0.001346	0.006897	-3e-06	0.008941	0.001999	0.004867	0.004614	0.005004	0.00626	0.001996	0.006052	0.006282	0.005227	0.011946	-0.00461	0.002057	0.008092	0.005007	0.005471	0.008613	0.002753	0.002196	0.000912	0.002205	0.007839	0.008412	0.010338
211798_x_at	-0.002154	0.001173	0.004402	0.00678	0.006885	-0.003158	0.001289	0.007847	0.001226	0.00217	0.005951	0.005409	-0.002917	0.01363	0.002413	0.003848	0.005457	0.006429	-0.00011	0.007218	0.004695	0.005168	0.000174	0.004462	-0.006763	0.014647	0.002673	0.005793	0.00253	0.006627	0.00911	0.005773	0.00397	0.0071	0.003498	0.012369	-0.007996	0.006657	0.011433	0.005085	0.003547	0.013928	0.000502	0.007306	0.005385	-0.000612	0.009317	0.018997	0.009264
211799_x_at	0.013191	0.010255	0.008444	0.016314	0.01104	0.011536	0.012007	0.00853	0.009164	0.010505	0.009093	0.009527	0.014296	0.016815	0.010149	0.011052	0.011069	0.012477	0.014174	0.010874	0.00722	0.012028	0.01133	0.012312	0.008815	0.012991	0.009637	0.010089	0.012176	0.011939	0.012192	0.007886	0.011475	0.014197	0.01157	0.012463	0.008328	0.008965	0.013027	0.011764	0.01153	0.014811	0.009344	0.00856	0.013789	0.010752	0.010389	0.01415	0.013601
211868_x_at	-0.00267	0.001171	0.003802	0.002142	0.004051	-0.00247	-4.1e-05	0.002725	0.001226	0.000364	2.4e-05	0.003561	-0.003983	0.009743	0.000214	0.002291	0.001258	0.00246	-0.002601	0.00474	0.001903	0.004431	0.000493	0.00367	-0.002967	0.009113	0.000576	0.001639	0.000271	0.003628	0.002643	0.002515	0.002746	0.002058	0.003006	0.007277	-0.001586	0.004137	0.0064	0.00188	-0.000497	0.009653	0.000126	0.002955	0.000785	-0.000577	0.004694	0.008779	0.006116
211881_x_at	0.000432	-3.7e-05	0.003124	0.005942	0.006349	-0.002171	0.000866	0.006599	0.000293	0.001344	0.005422	0.00439	-0.000409	0.013737	0.001368	0.002359	0.004636	0.00332	0.00012	0.004688	0.003549	0.003792	0.001337	0.003963	-0.00162	0.011364	0.001956	0.004692	0.001802	0.005284	0.007089	0.004243	0.002383	0.005277	0.002315	0.010863	-0.006428	0.005452	0.009845	0.003621	0.002612	0.012919	0.000739	0.006084	0.005104	-0.000159	0.01093	0.018275	0.008583
211902_x_at	0.002282	0.002092	-0.000343	0.002699	0.003204	0.000425	0.001878	0.003418	0.002863	-0.000781	0.001722	0.004712	0.000739	0.005123	0.003643	0.000827	0.002583	0.003982	0.001949	0.002033	0.000696	0.005216	0.000422	0.00272	0.000525	0.004933	-0.001518	0.002528	0.001797	0.002015	0.004225	0.000619	0.004023	0.003943	0.002668	0.007511	0.000638	0.000127	0.004512	0.002633	0.00316	0.004934	0.001181	5.6e-05	0.00165	0.002937	0.004707	0.005236	0.006687
211908_x_at	-0.00225	-0.003643	0.002388	0.00128	0.004593	-0.004239	-0.001926	0.003421	-0.000379	-1e-06	0.002903	0.002327	-0.008958	0.009547	-0.000464	0.002006	0.001939	0.005249	-0.001013	0.003708	0.002865	0.00215	4.6e-05	0.000272	-0.010477	0.008603	0.000292	0.002908	0.001576	0.004981	0.001835	0.003068	0.002717	0.003448	0.002788	0.006728	-0.004301	0.004021	0.005565	0.002215	0.001212	0.007602	-0.00156	0.003658	0.002561	-0.004096	0.002251	0.009436	0.008187
211911_x_at	0.020136	0.017871	0.013737	0.019856	0.016034	0.015198	0.015082	0.01438	0.016323	0.014681	0.013726	0.016143	0.016495	0.020048	0.015121	0.014423	0.015371	0.016516	0.018448	0.015001	0.014182	0.014871	0.016132	0.01569	0.014373	0.017922	0.012632	0.016277	0.017106	0.016199	0.016921	0.012795	0.016566	0.016755	0.016596	0.015915	0.014182	0.016556	0.015876	0.015097	0.015941	0.017163	0.013491	0.016433	0.018018	0.016615	0.015869	0.016553	0.015753
211991_s_at	0.012927	0.011301	0.011643	0.013354	0.012017	0.008362	0.011263	0.012927	0.012981	0.009153	0.012001	0.012585	0.012112	0.014205	0.013091	0.011481	0.013621	0.012659	0.009825	0.011309	0.010008	0.01189	0.012447	0.013171	0.00899	0.0148	0.01026	0.012776	0.013646	0.011616	0.012967	0.00933	0.012548	0.01459	0.013457	0.014331	0.00986	0.011913	0.013086	0.012698	0.011041	0.014208	0.012525	0.012136	0.011874	0.01301	0.013705	0.013467	0.013312
212203_x_at	0.017465	0.019202	0.014865	0.018048	0.013683	0.016918	0.014097	0.014109	0.015335	0.014511	0.013796	0.014591	0.015644	0.015899	0.016035	0.015658	0.01478	0.012628	0.017274	0.014483	0.014169	0.01423	0.016674	0.015432	0.015665	0.015801	0.014557	0.014747	0.015205	0.01499	0.014448	0.014148	0.016513	0.015687	0.01435	0.014428	0.013586	0.014662	0.013793	0.014216	0.013798	0.01554	0.014644	0.015163	0.015101	0.015829	0.014201	0.014483	0.015203
212413_at	-0.001766	-0.003064	-3e-06	0.001519	0.000943	-0.001375	4.8e-05	0.001752	-0.00025	0.000172	0.000452	0.000941	-0.001207	0.001565	0.000849	-0.000399	-7.5e-05	-0.000815	-0.001679	-0.000896	-0.000182	0.000935	-0.000781	9.9e-05	-0.000339	0.001227	-0.00032	0.000138	-0.000233	-0.000335	0.000315	1.5e-05	0.000845	0.001183	0.000669	0.002099	0.000467	-0.000688	0.001366	-0.000578	0.000431	0.000925	-0.000484	-0.00044	-0.000254	0.000557	0.001944	0.000896	0.001765
212414_s_at	0.001127	0.002197	0.00465	0.005051	0.004872	0.003516	0.004109	0.006074	0.004851	0.004526	0.003902	0.004086	0.00249	0.003426	0.004906	0.003397	0.004657	0.004103	0.001262	0.003502	0.005101	0.00585	0.002072	0.004093	0.004118	0.006009	0.00418	0.004204	0.004212	0.003679	0.004925	0.004645	0.005792	0.004042	0.003407	0.007787	0.003793	0.004643	0.006635	0.002851	0.003355	0.005112	0.00473	0.004185	0.002779	0.003887	0.005103	0.004376	0.006416
212415_at	-0.007758	-0.007733	0.000129	-0.000576	-0.000615	-0.002303	0.001929	0.00427	-0.000446	0.001843	0.001901	0.001924	-0.000718	0.001902	0.002103	-0.000883	0.002046	0.001802	-0.001004	0.002117	-0.000613	0.002282	-0.00287	0.001119	-0.000631	0.003644	4.7e-05	0.001793	0.001142	0.001691	0.000735	0.002647	0.00179	0.002511	-8.2e-05	0.006481	0.003081	0.00066	0.004335	-0.001602	0.00062	0.003276	-0.000432	-0.00022	-0.000514	-0.001039	0.003093	0.003403	0.005078
212587_s_at	0.006443	0.003338	0.002473	0.005515	0.00527	0.00497	0.006124	0.002467	0.006843	0.002395	0.002123	0.004411	0.004501	0.009379	0.00139	0.003815	0.003561	0.006749	0.000972	0.005708	-0.000455	0.002743	0.003732	0.006696	0.000878	0.009113	0.000284	0.004481	0.006492	0.00494	0.006241	0.000455	0.001294	0.002334	0.004133	0.008349	-0.000677	0.004105	0.007571	0.005643	0.003332	0.008172	0.004174	0.004052	0.004834	0.004205	0.005315	0.006009	0.010028
212588_at	0.003776	0.003803	0.003695	0.007268	0.006779	0.004064	0.005964	0.007227	0.00761	0.002992	0.006478	0.005436	0.005279	0.009484	0.006771	0.004732	0.007658	0.007822	0.003013	0.005117	0.003676	0.005601	0.005511	0.00707	0.001609	0.009841	0.003654	0.005821	0.007297	0.006137	0.006877	0.004035	0.005611	0.007528	0.005549	0.011042	0.001972	0.005234	0.007816	0.006497	0.006363	0.009468	0.004816	0.004683	0.005863	0.004853	0.008265	0.008144	0.009817
212592_at	-0.010421	-0.000565	0.010394	0.005574	0.008251	-0.007333	0.002329	0.009031	0.007148	0.005868	0.004882	0.007536	-0.002185	0.013737	0.006887	0.002944	0.009436	0.007294	0.004739	0.010178	0.01117	0.00965	0.003186	0.006276	-0.002776	0.010943	0.00813	0.008297	0.005569	0.009123	0.007465	0.011236	0.008408	0.007087	0.008327	0.011988	-0.000469	0.011244	0.007052	0.006631	0.005563	0.01067	0.006309	0.00897	0.002578	0.001643	0.009011	0.010385	0.010471
212671_s_at	0.011827	0.007299	0.009778	0.010724	0.010971	0.003845	0.00946	0.012035	0.01081	0.006388	0.011005	0.009777	0.008828	0.013507	0.010982	0.009097	0.012505	0.01272	0.006194	0.01031	0.008108	0.011497	0.009804	0.012335	0.0068	0.014979	0.010444	0.010741	0.010385	0.008666	0.011707	0.008207	0.011475	0.012802	0.011578	0.014586	0.006349	0.009105	0.012777	0.011931	0.011896	0.013925	0.010273	0.010363	0.008782	0.010551	0.014595	0.014353	0.012824
212827_at	-0.00329	0.002024	0.000795	0.000719	0.004492	-4.5e-05	2.2e-05	0.003221	1.5e-05	-0.000304	0.000557	0.002797	-0.000675	0.004943	0.004628	0.002904	0.001142	0.002378	-0.001002	0.001687	-0.000429	0.003692	-0.001199	0.002432	-0.001409	0.003155	-7.8e-05	0.00112	0.002156	0.000279	0.001959	0.000809	0.002573	0.000381	0.00297	0.010645	-0.000734	0.000847	0.003989	0.001553	-0.001548	0.002801	-0.0028	-0.000114	-0.00126	-0.0009	0.004328	0.003252	0.007623
212873_at	-0.002327	0.002319	-0.00078	0.002468	0.001681	-0.001641	0.003134	0.002975	0.002992	5.9e-05	0.001062	0.002009	0.001506	0.003179	0.002081	0.00051	0.002398	0.003936	0.000125	0.001073	0.000641	0.00029	0.001495	0.00258	-0.000331	0.002099	-0.001557	0.002789	0.002066	0.00266	0.00077	-0.000386	0.001752	0.001869	0.002858	0.006395	0.002116	0.00163	0.003342	1.6e-05	-0.001605	0.003243	0.000164	0.00307	-0.001046	0.001992	0.002547	0.001341	0.005589
213038_at	0.00026	-0.00492	0.002262	0.005238	0.004909	0.002389	0.003412	0.00359	0.002797	0.003133	0.002431	0.003736	0.00402	0.004617	0.003349	0.003664	0.004919	0.004006	0.00326	0.002739	0.002228	0.002607	0.003637	0.004447	0.003188	0.005721	0.003687	0.003895	0.00535	0.003292	0.004189	0.002771	0.003216	0.004771	0.003574	0.003079	0.003909	0.002851	0.002829	0.003727	0.003611	0.005543	0.004161	0.003193	0.005914	0.004618	0.004341	0.004433	0.003599
213095_x_at	0.001391	-0.005201	0.002793	0.004521	0.004933	0.004234	0.004889	0.00421	0.004936	0.003532	0.00447	0.004346	0.005239	0.006421	0.004344	0.00271	0.007011	0.006171	0.000896	0.005023	0.003733	0.003964	0.003392	0.004842	0.00153	0.008143	0.003122	0.004785	0.006	0.003281	0.004635	0.002902	0.003983	0.005473	0.003657	0.00738	0.003273	0.004395	0.00492	0.003041	0.004406	0.008524	0.004001	0.004798	0.002582	0.00427	0.006382	0.004019	0.005034
213160_at	0.00219	-0.007662	-0.001347	0.001197	0.000242	-0.000233	0.001894	0.003083	0.001396	-0.000425	0.000413	0.000567	0.001517	0.002172	0.001057	-0.000144	0.00283	0.002769	-0.000806	0.002642	-0.000938	0.000417	-3e-05	0.002333	-5.5e-05	0.004122	-0.000518	0.00099	0.002417	0.000821	0.001974	-0.001647	0.001417	0.000971	0.00121	0.005039	3.3e-05	-6.7e-05	0.00199	0.000617	0.000436	0.003936	0.001637	8.6e-05	-0.000145	0.001271	0.003623	0.002008	0.003346
213193_x_at	0.007119	0.00424	0.004037	0.007825	0.007738	0.003068	0.007123	0.009042	0.006523	0.002183	0.006462	0.007822	0.005301	0.010324	0.008129	0.005749	0.007411	0.00787	0.003508	0.006346	0.004804	0.008021	0.003848	0.007264	0.002882	0.010433	0.003488	0.005597	0.005957	0.007402	0.008717	0.002776	0.008036	0.007665	0.006294	0.012984	0.002654	0.005993	0.009404	0.006631	0.006732	0.010064	0.004682	0.003514	0.004491	0.003738	0.009481	0.010082	0.011629
213293_s_at	0.008253	0.005563	0.00683	0.011593	0.007313	0.005791	0.006938	0.009303	0.007439	0.006432	0.007941	0.008602	0.007218	0.009695	0.009382	0.007002	0.008654	0.007847	0.006987	0.008088	0.006366	0.00915	0.008062	0.007891	0.007058	0.009882	0.00753	0.008147	0.008711	0.008445	0.006626	0.006719	0.009215	0.009335	0.007824	0.011131	0.005355	0.00793	0.006769	0.007518	0.011011	0.010824	0.006889	0.008213	0.007915	0.007212	0.009661	0.009158	0.010145
213294_at	0.006352	0.005731	0.006758	0.008918	0.006575	0.004584	0.006903	0.007027	0.005711	0.005193	0.006226	0.006068	0.006947	0.00785	0.007286	0.005614	0.005783	0.006882	0.007358	0.005078	0.005746	0.006617	0.008151	0.004725	0.007053	0.007967	0.005405	0.005519	0.007266	0.007562	0.004741	0.005836	0.008471	0.006401	0.005099	0.006032	0.005933	0.006055	0.004938	0.005677	0.007021	0.007584	0.005399	0.005528	0.00657	0.005897	0.007226	0.007074	0.006531
213416_at	-0.00363	-0.009957	0.00318	0.001508	0.001022	-0.001402	0.000517	-0.000567	0.001548	-0.000302	-0.000166	0.000745	0.001027	0.00039	0.001448	-0.000222	0.002169	0.001574	0.000849	-0.00029	-0.000615	0.000613	-6e-05	0.001396	0.004377	0.002459	0.0005	0.00183	0.002762	0.000872	0.001472	-0.000782	-0.000199	-0.001154	-0.001842	0.003702	0.000519	0.000331	0.001355	-0.00093	7.9e-05	0.002113	0.000228	0.000764	-0.001171	0.000271	0.00183	0.000915	0.002858
213502_x_at	-0.003326	0.004685	0.007619	0.008041	0.009412	0.002962	0.005629	0.009348	0.006977	0.007528	0.008468	0.008967	0.00422	0.013917	0.007325	0.008334	0.007176	0.008093	0.005313	0.009507	0.00896	0.007751	0.006971	0.006255	0.001899	0.011616	0.008067	0.00954	0.007266	0.010399	0.008614	0.009051	0.007494	0.009174	0.009776	0.011315	0.002578	0.010133	0.010763	0.009856	0.00726	0.012041	0.006562	0.009266	0.006694	0.003038	0.008943	0.014969	0.01032
213539_at	0.005902	0.00546	0.001699	0.005001	0.005037	0.001211	0.003667	0.005615	0.004178	-0.003139	0.003232	0.004927	0.002002	0.007031	0.004095	0.003281	0.004817	0.005267	0.001164	0.003177	0.002177	0.004506	0.00203	0.004225	2e-06	0.007023	0.001193	0.002209	0.003964	0.004483	0.005767	0.000822	0.0046	0.006686	0.002998	0.009747	-0.000568	0.002496	0.005611	0.003253	0.004922	0.007566	0.002295	0.002245	0.002819	0.001715	0.005297	0.006268	0.008215
213566_at	0.003726	-0.00752	0.001171	0.003614	0.003578	0.002386	0.004629	0.006401	0.003451	0.000363	0.004545	0.003373	0.004287	0.004152	0.005915	-7.6e-05	0.004524	0.004996	0.000945	0.004773	0.001902	0.005747	0.003958	0.005333	0.00131	0.006155	0.003602	0.005255	0.005977	0.004401	0.00418	0.003144	0.005619	0.004604	0.00399	0.007763	0.000858	0.002566	0.006018	0.002278	0.003965	0.005807	0.005409	0.006183	-0.001452	0.003519	0.005633	0.005287	0.00759
213603_s_at	0.00481	0.008648	0.007465	0.00774	0.008734	0.005969	0.007788	0.010223	0.00792	0.007366	0.006945	0.008725	0.007359	0.011506	0.008823	0.007423	0.007915	0.008257	0.005296	0.007609	0.005909	0.009832	0.007471	0.008703	0.005735	0.011002	0.005924	0.007686	0.009376	0.008273	0.008413	0.007229	0.008209	0.0093	0.007436	0.013567	0.007664	0.007252	0.009409	0.007415	0.00717	0.010647	0.006186	0.008528	0.005433	0.007113	0.009332	0.010499	0.011838
213733_at	0.005604	0.004037	0.001902	0.004011	0.004173	0.001564	0.003089	0.00378	0.004196	0.001221	0.002338	0.002692	0.002502	0.006042	0.003956	0.003689	0.003671	0.003304	0.00076	0.004707	0.002439	0.002958	0.003039	0.003747	0.001346	0.004562	7.1e-05	0.003654	0.004326	0.002963	0.00389	0.001508	0.00294	0.003367	0.003639	0.005827	0.002701	0.003664	0.003935	0.004642	0.002453	0.003943	0.003748	0.002343	0.002798	0.004226	0.003242	0.004936	0.004123
213797_at	0.00704	-0.002081	0.000733	0.009945	0.002483	0.000865	0.007438	0.001736	0.000152	0.000816	0.003035	0.002675	0.003983	0.00524	0.005786	0.00319	0.004675	0.003455	0.006059	0.002194	-0.000663	0.004136	0.006412	0.004238	0.005632	0.008073	0	0.001033	0.00374	0.004771	0.00324	0.001681	0.005585	0.007815	0.000596	0.002835	0.003442	0.000844	0.000788	0.002068	0.006415	0.006031	0.00345	9.1e-05	0.008228	0.001369	0.005132	0.005714	0.005234
213830_at	-0.005366	-0.001797	-0.003671	-0.006729	-0.00675	-0.007886	-0.008578	-0.003244	-0.001968	-0.007755	-0.002145	-0.003653	-0.00247	-0.003966	-0.004331	-0.003219	-0.000725	-0.006378	-0.008147	-0.001918	-0.005085	-0.000344	-0.007564	-0.001497	-0.007748	-0.001404	-0.004354	-0.007049	-0.007159	-0.002426	-0.003017	-0.004761	-0.000977	-0.001213	-0.007522	0.000978	-0.006884	-0.001339	0.001571	-0.005205	-0.003449	-0.000337	-0.007597	-0.007678	-0.006581	-0.005589	-0.001695	-0.001937	-0.000828
213888_s_at	-0.000569	-0.001383	-0.00073	0.001075	0.003799	-0.003171	0.000951	0.003284	0.000949	-0.005263	-0.000107	-0.000573	-0.000561	0.003919	0.001482	-4.6e-05	0.001514	0.000408	-0.002504	-0.000405	-0.001824	0.001615	-0.000642	0.002567	-0.00322	0.001547	-0.001628	0.000943	0.000455	0.000468	0.002067	-0.00096	-0.000327	0.000573	-0.001315	0.006799	-0.001418	-0.000732	0.001673	0.000362	0.001468	0.001849	-0.000178	-0.002899	-0.001799	-0.001407	0.002084	0.000935	0.00446
213915_at	-0.009526	-0.008445	-0.003951	0.000212	0.002213	-0.007698	-0.002977	-0.003007	-0.000595	-0.009385	-0.002329	0.000393	-0.000279	0.000979	0.000449	-0.001569	0.002626	0.002083	-0.006689	0.000602	-0.003294	0.00088	-0.002925	0.000489	-0.013501	0.002035	-0.004422	0.000459	-0.001563	-0.000365	0.001314	-0.004821	0.001582	0.002996	-0.000523	0.003815	-0.012073	-0.002875	0.002666	-0.000458	0.003537	0.005173	-0.007251	-0.004378	-0.002011	-0.003485	0.003266	0.004555	0.003503
213932_x_at	0.019906	0.020251	0.016221	0.020317	0.017423	0.016835	0.016319	0.016211	0.0162	0.016112	0.015353	0.016689	0.016559	0.020645	0.016264	0.017332	0.016194	0.016882	0.018499	0.016346	0.015199	0.015777	0.016777	0.017139	0.016701	0.018116	0.015811	0.016099	0.017294	0.016654	0.018346	0.01479	0.016669	0.017731	0.01682	0.017276	0.014733	0.017124	0.016714	0.017098	0.015864	0.017656	0.015559	0.016556	0.018301	0.017168	0.016072	0.017951	0.016791
213958_at	-0.000439	0.003217	-0.000616	0.003883	0.003198	-0.001115	0.002327	0.003009	0.002113	-0.000342	0.002038	0.000616	0.000779	0.00565	0.002732	0.002357	0.00236	0.00408	-6e-06	-0.002199	0.000244	0.002401	0.001347	0.002386	-0.000159	0.005271	-0.000497	0.000888	0.00164	0.002142	0.003252	-0.000387	0.001423	0.003754	0.000804	0.006179	0.000515	0.001618	0.004696	0.001834	0.001382	0.004683	0.000294	-0.000497	0.001009	0.000181	0.000553	0.003449	0.005349
213975_s_at	0.009666	0.004176	0.006779	0.011228	0.009813	0.010432	0.0091	0.01007	0.009394	0.005458	0.008439	0.009312	0.004245	0.014154	0.008594	0.007172	0.009818	0.011093	0.00881	0.007645	0.0065	0.008098	0.007398	0.009597	0.006517	0.013417	0.007899	0.005828	0.006316	0.008979	0.010956	0.007684	0.007887	0.011269	0.00835	0.012053	0.006855	0.006284	0.011279	0.00886	0.009603	0.013009	0.006833	0.00698	0.009006	0.006826	0.012209	0.012258	0.01109
213982_s_at	-0.000342	-0.002234	0.001282	0.003312	0.003291	0.001791	0.002464	0.002575	0.002799	0.001683	0.001893	0.001686	0.003151	0.002266	0.002432	0.000689	0.001245	0.002227	0.001263	0.003425	0.002155	0.002758	0.001749	0.002498	0.00275	0.003371	0.001187	0.002865	0.00218	0.001649	0.003193	0.002204	0.002163	0.003327	0.002954	0.004356	0.000101	0.003873	0.002527	0.001119	0.002771	0.002888	0.003772	0.003856	0.002189	0.002811	0.004015	0.002604	0.00251
214022_s_at	0.013611	0.01525	0.012584	0.017458	0.011749	0.01736	0.01307	0.012811	0.013062	0.011462	0.011819	0.013631	0.014568	0.016209	0.014656	0.015043	0.01262	0.011026	0.017136	0.012893	0.012104	0.012544	0.015491	0.012103	0.013044	0.015055	0.012749	0.012182	0.013789	0.014771	0.012582	0.011149	0.015559	0.014372	0.012702	0.013464	0.011214	0.013223	0.011722	0.011797	0.012252	0.01438	0.013542	0.013174	0.014145	0.013704	0.012713	0.01324	0.0146
214032_at	-0.004791	-0.007388	-0.011269	-0.011172	-0.003108	-0.008216	-0.002004	0.000496	-0.002065	-0.00648	-0.005002	-0.002862	-0.008206	0.000353	-0.000972	-0.009914	-0.001453	-0.000565	-0.008886	-0.004418	-0.003769	-0.003117	-0.00594	-0.004045	-0.009489	-0.001497	-0.006002	-0.005199	-0.002255	-0.002837	-0.010477	-0.006251	-0.002948	-0.00198	-0.008881	0.004934	-0.010026	-0.002905	0.000118	-0.004592	-0.001494	2e-06	-0.005114	-0.010101	-0.009511	-0.010452	-0.00167	-0.000611	0.002305
214038_at	-0.00193	0.00194	-0.003292	0.00611	0.00301	2.8e-05	0.004437	0.002462	0.005575	-0.0075	-0.000552	0.002249	0.000216	0.007186	-0.001274	0.001833	0.00194	-0.000268	0.002789	0.001277	0.00023	0.001279	0.001776	0.00364	-0.00029	0.006703	-0.004295	0.00012	-2.2e-05	0.001589	0.005195	-0.002404	0.000756	0.008407	0.001427	0.002088	0.000892	-0.001391	0.000465	0.000295	0.004504	0.00802	0.000523	0.002074	0.009271	0.003349	0.005255	0.00719	0.003224
214049_x_at	-0.005883	-0.007239	-0.002132	-0.004105	-0.003055	-0.006931	-0.002984	-0.001605	-0.005364	-0.006599	-0.007845	0.000641	-0.009867	-0.001214	-0.005734	-0.006913	-0.000691	-0.003888	-0.009584	-0.008129	-0.010041	-0.000867	-0.012118	-0.001231	-0.003413	0.000922	-0.003176	-0.002811	-0.003429	-0.005888	-0.00727	-0.008722	-0.007096	-0.001001	-0.005622	0.002067	-0.002545	-0.009576	7.4e-05	-0.007923	-0.002634	0.000497	-0.008486	-0.00226	-0.007748	-0.002751	-0.00209	-0.000116	0.000885
214054_at	-0.002008	-0.008438	-0.002273	0.000885	-0.000409	-0.001712	0.000643	0.001307	0.001684	-0.003656	-0.000258	3e-05	-0.003643	0.001844	-0.000976	-0.003387	-0.001161	0.001265	-0.001119	0.000614	-0.001641	-0.001228	-0.001921	0.001661	-0.00152	0.002927	-0.001555	-0.001414	-0.002225	-0.000268	0.001059	-0.001585	-0.000527	0.000161	4e-06	0.002661	-0.000405	-0.005778	0.00135	-0.002424	0.001019	0.001972	4.6e-05	-0.000572	-0.001248	7.4e-05	0.000487	0.000585	0.001603
214059_at	-0.000588	0.000794	-0.003503	0.002329	-0.002773	-0.002183	-0.003112	-0.00059	-0.005497	-0.005659	-0.001899	-0.003125	-0.000337	-0.00206	0.002401	-0.003875	-0.004066	-0.003071	-0.002486	-0.000536	-0.004905	-0.004944	0.001137	-0.005142	-0.000408	0.000396	-0.004064	-0.004281	0.000229	0.000672	-0.005176	-0.001596	0.002889	-0.002459	-0.002949	-0.002425	-0.003155	-0.004492	-0.002029	-0.007047	-0.00232	-0.001184	-0.004531	-0.004314	-0.000873	-0.004028	-0.003002	-0.00167	-0.002639
214084_x_at	-0.0043	-0.004119	-0.002956	0.000346	0.000218	-0.004504	-0.001045	-0.000366	-0.000844	-0.001222	-0.001815	0.000507	-0.000476	0.002091	-6.2e-05	-0.001979	-0.000212	0.001887	-0.004228	-0.003064	-0.001963	-0.000298	-0.000576	0.000738	-0.00812	0.00328	-0.006446	-0.000725	0.000334	-0.001584	-0.002231	-0.006793	-0.002615	0.001515	0.000156	0.004655	-0.001089	-0.001612	0.000823	-0.005281	-0.001113	0.001539	-0.001908	-0.001323	-0.000836	0.000134	0.001574	0.001738	0.002324
214181_x_at	0.001646	0.002147	-0.000313	0.000113	3e-06	-0.000274	0.000835	0.000952	0.001506	8.6e-05	0.001041	0.001835	0.00234	0.003868	0.003265	0.001125	0.003908	0.002074	-0.002276	0.002104	0.000614	0.001634	0.000971	0.002606	-0.003231	0.004338	-0.00068	0.003438	0.003378	0.001291	0.003352	-0.000533	0.002629	0.002094	0.002005	0.004718	0.000771	0.002859	0.002865	0.000158	-0.000944	0.00571	0.000264	0.002195	0.001253	0.000553	0.002981	0.00409	0.002551
214186_s_at	-0.000471	-0.004532	-0.001297	0.002528	0.00165	-0.000972	0.00011	0.000888	-0.000992	0.000752	-0.00054	0.000732	0.000134	-0.000835	0.001155	0.000885	0.00104	-0.001242	-0.000435	-0.002361	-0.000778	0.000562	-0.000381	0.001135	0.000659	0.001975	-0.002425	-0.00255	-8.7e-05	0.001168	-0.000581	-0.000118	0.002163	0.001946	-0.00033	0.001444	-0.009253	0.000416	0.00093	0.000479	0.001321	-0.00021	0.000815	-0.000821	-0.00114	-0.003106	0.001379	0.00177	0.001672
214219_x_at	-0.00543	-0.007232	-0.007844	-0.011087	-0.00492	-0.01184	-0.007221	-0.002578	-0.010783	-0.011269	-0.011796	-0.009228	-0.0088	-0.000138	-0.003407	-0.010375	-0.004501	-0.006355	-0.00825	-0.011768	-0.00832	-0.002709	-0.010905	-0.004821	-0.010088	-0.000192	-0.010094	-0.007927	-0.003096	-0.007949	-0.008171	-0.011882	-0.006594	-0.003225	-0.008967	0.003045	-0.008629	-0.007604	-0.000801	-0.009351	-0.007522	-0.001471	-0.011295	-0.01151	-0.011693	-0.009428	-0.003407	-0.001207	0.000301
214228_x_at	-0.003877	-0.006812	-0.001146	0.000144	0.000676	-0.002669	0.002121	0.000735	0.000211	-0.003056	-0.004112	-0.000993	-0.002544	-0.00542	-0.000799	-0.001512	-0.00496	-6.3e-05	-0.004974	-0.011334	-0.011172	-0.00201	-0.004928	0.000944	-0.006131	0.002391	-0.002538	-0.001574	-0.001391	-0.00051	-0.00283	-0.010978	-0.00371	-0.000458	-0.006223	0.001181	0.004523	-0.00375	-0.003252	-0.001759	-0.001858	0.000538	-0.005923	-0.008392	-0.006211	-0.002905	0.00025	0.000788	0.000393
214339_s_at	-0.003554	0.001648	-0.001352	-0.000832	-0.000759	-0.002559	-0.000569	0.000848	0.000575	-0.003659	-0.000766	0.000452	-0.000654	0.00322	0.001339	-0.000887	0.000131	0.000387	-0.000342	0.00101	-0.001034	3.6e-05	-0.000745	0.000231	-0.001933	0.000908	-0.001315	-0.000558	0.000112	0.000547	0.001542	-0.00218	0.000239	0.001067	0.00026	0.004056	-0.000407	-7.4e-05	0.000343	-0.000433	-0.000243	0.000431	-9.3e-05	-0.00129	-0.002324	0.000153	0.000673	0.0011	0.001258
214366_s_at	0.000766	-0.005539	0.002113	-0.002092	-0.00133	-0.003122	-0.000424	0.000423	-0.00065	-0.000455	-0.001335	-0.001624	0.000547	0.000386	0.00338	-0.002608	0.000404	0.000241	-0.001899	0.00141	-0.00072	-0.001232	-0.001502	0.001577	-0.001624	0.002461	-0.000587	0.001984	0.000445	-0.003512	-0.000803	-0.002157	0.000829	-3e-05	-0.003683	0.001283	-0.001099	-0.001591	-0.001368	-0.001207	-0.003357	0.002357	-0.00018	-0.001283	-0.001527	1.6e-05	0.000375	0.001621	0.000272
214450_at	-0.0058	-0.006663	-0.008185	-0.006006	-0.004303	-0.006983	-0.008328	-0.003068	-0.009287	-0.009014	-0.009018	-0.009309	-0.006456	-0.004279	-0.003228	-0.008356	-0.000454	-0.001032	-0.006478	-0.009592	-0.01244	-0.009671	-0.008449	-0.009037	-0.011391	0.002425	-0.00923	-0.007518	-0.00584	-0.008563	-0.008307	-0.011648	-0.006652	-0.001375	-0.010518	0.004146	-0.008241	-0.009051	0.002805	-0.009161	-8.6e-05	0.004192	-0.011154	-0.009315	-0.007696	-0.008972	-0.003816	-0.001477	-0.002604
214453_s_at	0.002787	0.001661	0.002809	0.00938	0.003602	0.004252	0.005584	0.004943	0.003657	0.002657	0.004234	0.00465	0.008075	0.007904	0.006587	0.004829	0.004282	0.003819	0.005862	0.003018	0.002188	0.006848	0.00842	0.004055	0.007064	0.007704	0.001737	0.003677	0.005817	0.006663	0.002627	0.002713	0.007736	0.006877	0.002821	0.006029	0.004973	0.00207	0.003981	0.001107	0.006797	0.00771	0.003604	0.002488	0.00677	0.003743	0.005576	0.00443	0.006244
214459_x_at	0.020495	0.018241	0.015652	0.020069	0.017219	0.016748	0.016211	0.01605	0.016692	0.015852	0.016043	0.017415	0.017507	0.021085	0.017716	0.017173	0.016556	0.017404	0.01923	0.016706	0.015568	0.016003	0.017394	0.017067	0.015691	0.018288	0.014536	0.017604	0.017424	0.017236	0.018324	0.015068	0.017647	0.018111	0.017473	0.017313	0.015734	0.017293	0.016722	0.017388	0.016479	0.017866	0.015889	0.016658	0.018344	0.017364	0.016722	0.018375	0.016927
214467_at	0.003956	-0.001015	-0.000808	0.002822	0.001911	7.8e-05	0.002794	0.000817	0.001449	-0.001532	0.001151	0.000643	0.002036	0.002655	0.002617	0.001154	0.003987	0.002736	-0.000933	0.001915	-0.000751	0.001984	0.002147	0.002363	-0.000882	0.003389	-0.000316	0.001905	0.003536	-0.000325	0.001403	0.000667	0.001591	0.003147	0.000612	0.005065	5.8e-05	0.001453	0.001316	0.000448	0.001566	0.0037	0.000758	0.002541	0.000356	0.001262	0.003119	0.003249	0.004243
214470_at	-0.007822	-0.006691	-5.2e-05	2.4e-05	0.002877	-0.003578	-0.000451	0.002627	0.002847	-0.009529	0.000528	0.001919	-0.003006	0.002135	0.000831	-0.001025	0.00295	0.000104	-0.002789	0.002005	0.0011	0.002109	-0.001063	0.001443	-0.002697	0.001054	-0.000146	-0.001981	0.000679	0.000836	0.001953	0.000101	-0.00021	-0.001293	0.001284	0.007028	-0.003982	0.000247	0.002372	-0.000148	-0.00341	0.003433	0.000996	0.000581	-0.003611	0.000122	0.003211	0.002605	0.005026
214511_x_at	0.001085	-0.005745	0.001511	0.004873	0.004224	0.000185	0.002757	0.001714	0.003155	0.002003	0.001696	0.000387	0.004141	0.005319	2.1e-05	0.00337	0.00365	0.00303	0.002454	0.001966	0.001329	0.002118	0.003257	0.005512	0.002369	0.006415	0.000979	0.003661	0.00347	0.000794	0.003581	0.001194	0.001349	0.006011	0.003477	0.001382	0.002561	0.003018	0.002239	0.003398	0.002916	0.005646	0.002523	0.002904	0.005204	0.006364	0.006654	0.006612	0.001509
214551_s_at	-0.006469	-0.009651	-0.011597	-0.001036	-0.001532	-0.004504	-0.003977	-0.001939	-0.008692	-0.00958	-0.005827	-0.00415	-0.007678	-0.000514	-0.003682	-0.003505	-0.003225	-0.00236	-0.009132	-0.013094	-0.012406	-0.00189	-0.011791	-0.002165	-0.010469	0.000137	-0.007014	-0.008591	-0.00269	-0.001686	-0.003885	-0.010521	-0.00405	-0.001628	-0.008597	0.001275	-0.008668	-0.007946	0.000104	-0.002968	-0.001289	-0.001169	-0.007376	-0.004284	-0.005115	-0.005589	-0.002921	-0.000297	-0.000266
214560_at	0.002981	0.001365	0.000389	0.002566	0.002887	0.000918	0.003689	0.001088	0.001097	0.00085	0.00281	0.000899	-0.000368	0.003931	-0.000133	0.000729	0.002126	0.003901	0.001868	0.003279	-0.001784	0.002584	0.000382	0.0049	0.002141	0.006326	0.00196	-0.00257	-0.001175	0.001019	0.004052	0.00104	0.000388	0.005115	0.001198	0.002948	0.002778	-0.002184	0.002019	0.001944	0.003871	0.004572	-0.000774	0.002215	0.0035	0.004302	0.005821	0.005503	0.003902
214567_s_at	-0.00628	-0.007363	-0.007342	-0.003264	-0.005863	-0.009093	-0.005664	-0.008432	-0.00488	-0.014071	-0.006143	-0.003725	-0.003532	0.001434	-0.004788	-0.012284	-3e-06	-0.001325	-0.007468	-0.001274	-0.011291	-0.002485	-0.009129	-0.005007	-0.011383	-0.000651	-0.00751	-0.002738	-0.005572	-0.002714	-0.002431	-0.01138	-0.001558	-0.000456	-0.005081	0.003765	-0.011705	-0.011833	0.001065	-0.011033	-0.002517	0.000201	-0.004123	-0.003057	-0.009584	-0.005951	0.001333	-0.000578	-0.001541
214574_x_at	0.002261	0.003279	0.002711	0.004411	0.003483	0.002006	0.003217	0.004898	0.002936	0.001436	0.003175	0.003478	0.003838	0.005268	0.004702	0.003643	0.00618	0.005595	0.001995	0.003582	0.002171	0.003951	0.003326	0.004959	-0.000863	0.006516	0.002334	0.004869	0.005116	0.003515	0.004381	0.002296	0.004185	0.004962	0.003821	0.006615	0.002444	0.004514	0.004301	0.002635	0.002991	0.00735	0.002721	0.004022	0.003062	0.003905	0.0046	0.005411	0.004919
214615_at	-0.005226	-0.011803	-0.008948	-0.005641	-0.005653	-0.013111	-0.005509	-0.006248	-0.008588	-0.010546	-0.004558	-0.00504	-0.009264	-0.004348	-0.005345	-0.005953	-0.005755	-0.004267	-0.005873	-0.009337	-0.006268	-0.005529	-0.006491	-0.005481	-0.008884	-0.002513	-0.008457	-0.005318	-0.007888	-0.005651	-0.006107	-0.005689	-0.005165	-0.003832	-0.007915	-0.001674	-0.014743	-0.005216	-0.003927	-0.012994	-0.00655	-0.002778	-0.010307	-0.007049	-0.007526	-0.008097	-0.005096	-0.005801	-0.003046
214669_x_at	0.006446	0.007851	0.012915	0.012162	0.015248	0.004795	0.007273	0.013686	0.010126	0.011195	0.011264	0.012574	0.003608	0.021161	0.009196	0.010052	0.013056	0.014348	0.005927	0.014508	0.012767	0.012503	0.010254	0.012096	0.003896	0.018252	0.011353	0.013511	0.010387	0.014422	0.014808	0.012942	0.011653	0.01338	0.010846	0.017639	0.003294	0.014913	0.017104	0.012121	0.009598	0.017535	0.007451	0.015021	0.011701	0.005148	0.014715	0.018378	0.016564
214677_x_at	0.00628	0.008772	0.016285	0.017165	0.017931	0.007029	0.01127	0.017661	0.014736	0.014279	0.01472	0.016501	0.007053	0.022371	0.013648	0.016332	0.015937	0.016045	0.012002	0.018585	0.017207	0.015261	0.012476	0.016191	0.003566	0.019694	0.015289	0.016472	0.014074	0.017026	0.018042	0.01613	0.015743	0.018509	0.015516	0.018782	0.004704	0.018278	0.018212	0.016342	0.013613	0.018888	0.013174	0.017824	0.016189	0.008144	0.017012	0.019919	0.01803
214768_x_at	-0.000192	0.000949	0.009895	0.006406	0.009406	0.005742	0.002984	0.009168	0.006507	0.004083	0.008333	0.00883	-0.001141	0.012811	0.005303	0.003454	0.004382	0.014484	0.001098	0.009111	0.008031	0.008947	0.003835	0.005153	-0.001244	0.017469	0.006684	0.007622	0.004479	0.008111	0.007228	0.00888	0.006533	0.006761	0.007652	0.015892	-0.001713	0.009912	0.011485	0.006826	0.00734	0.017437	0.003005	0.009047	0.006071	0.000406	0.009356	0.013634	0.012365
214777_at	-0.002277	-0.005674	0.007684	0.004702	0.004349	-0.007513	0.006766	0.007491	0.005601	0.001709	0.005404	0.005048	-0.009556	0.01661	0.00228	0.003602	0.007306	0.009488	-0.000502	0.008266	0.005999	0.006866	0.002006	0.006278	-0.008646	0.0171	0.00519	0.008401	0.002503	0.012871	0.01297	0.007116	0.003152	0.007498	0.004818	0.0142	-0.004828	0.00931	0.012555	0.005727	0.006797	0.016467	-0.001636	0.007718	0.004172	-0.002848	0.012157	0.01215	0.011747
214836_x_at	0.007213	0.004347	0.01172	0.010519	0.0113	0.005315	0.006496	0.010482	0.010246	0.008308	0.010237	0.010826	0.0024	0.017672	0.007008	0.008413	0.008249	0.012017	0.006246	0.013683	0.011505	0.009781	0.0073	0.008802	0.00252	0.016879	0.009814	0.011339	0.007939	0.012142	0.01181	0.00934	0.007654	0.012525	0.009919	0.016304	0.001358	0.013877	0.014236	0.010623	0.00718	0.017127	0.007044	0.013042	0.009398	0.004469	0.011927	0.016805	0.014491
214847_s_at	-0.00605	-0.006798	-0.002943	0.001669	-0.000204	-0.003228	0.000179	-9.6e-05	-0.003796	-0.00193	-0.00024	-0.001917	-0.000796	0.001659	-0.000538	-0.002654	0.000645	-0.000681	-0.00111	-0.001054	-0.001546	-0.001416	-0.001776	0.000938	-0.000461	4.2e-05	-0.001535	-0.000591	0.000982	-0.00256	0.000259	-0.001751	-0.000833	0.001545	-0.000781	0.003665	-0.00075	2.1e-05	-0.000569	-0.000575	-0.002336	0.002603	-0.004459	-0.000976	-8.2e-05	-0.001363	0.001351	0.000744	0.001988
214916_x_at	0.000515	0.000107	0.005352	0.003286	0.008224	-0.006496	0.000325	0.003925	0.000213	0.003025	0.003782	0.005221	-0.001224	0.017776	0.003399	0.003373	0.004973	0.012313	-0.000304	0.007829	0.00404	0.007772	0.002203	0.006235	-0.002151	0.013664	0.002573	0.004648	0.003508	0.009713	0.007326	0.006062	0.003747	0.011503	0.005112	0.011444	-0.002397	0.006601	0.008471	0.005203	0.002664	0.013055	0.001462	0.005135	0.003773	-0.00046	0.010222	0.014732	0.012193
214973_x_at	-0.005271	0.000705	0.00747	0.003294	0.010838	-0.002387	0.00151	0.004798	0.002877	0.003126	0.003632	0.005611	-0.000127	0.019053	0.002598	0.005088	0.008547	0.009501	0.002665	0.005615	0.008	0.006574	0.002474	0.011706	-0.002056	0.016775	0.004463	0.008348	0.00451	0.007341	0.007847	0.00423	0.006002	0.010284	0.006507	0.009132	-0.002044	0.007376	0.010732	0.003568	0.003579	0.018072	0.002651	0.007911	0.006559	0.000263	0.005286	0.01484	0.01079
214995_s_at	-0.002559	0.001742	-0.002863	-0.001508	-0.002858	-0.003627	-0.000803	-0.002405	-0.003157	-0.009068	-0.001613	-0.001419	0.000892	0.000497	-0.001994	-0.000236	-1.4e-05	0.000103	-0.001059	0.001538	-0.001373	0.000551	0.000429	0.000529	-0.000733	0.001718	-0.000663	-0.001238	-0.000727	-0.002114	-0.0007	-0.001207	-0.001646	0.000528	-0.001858	0.002065	-0.005529	-0.003615	-0.000961	-0.001555	0.00075	0.002112	-0.0016	-0.008124	-0.001144	-0.003213	0.001369	0.001618	0.001007
215035_at	-0.008804	-0.007755	-0.013427	-0.008841	-0.009165	-0.012998	-0.012945	-0.012827	-0.012875	-0.013123	-0.014982	-0.01078	-0.012199	-0.009335	-0.013795	-0.012139	-0.00443	-0.009856	-0.011185	-0.008575	-0.013983	-0.00955	-0.011625	-0.008255	-0.014555	0.003428	-0.014012	-0.00898	-0.014479	-0.00682	-0.009495	-0.007981	-0.0122	-0.009771	-0.01	-0.008554	-0.01224	-0.013552	-0.006493	-0.013203	-0.013125	-0.006236	-0.014524	-0.013272	-0.008002	-0.013618	-0.014428	-0.006617	-0.002475
215049_x_at	0.006329	0.003596	0.004917	0.00806	0.008253	0.01012	0.007521	0.007219	0.010286	0.00185	0.004727	0.006127	0.005419	0.009244	0.006136	0.004055	0.004619	0.007776	0.00402	0.011292	0.002997	0.005727	0.005139	0.009258	0.006377	0.012089	0.00466	0.005755	0.006089	0.006447	0.011313	0.004742	0.006172	0.009209	0.004904	0.009072	0.006244	0.003994	0.008159	0.005638	0.008459	0.010341	0.008186	0.009601	0.00875	0.008309	0.009591	0.008761	0.008124
215051_x_at	0.00588	-4.5e-05	0.004992	0.005779	0.006529	0.004988	0.005099	0.007095	0.008224	0.002945	0.006026	0.005108	0.006355	0.009095	0.006503	0.004034	0.00939	0.00667	0.00203	0.007147	0.004698	0.004488	0.004583	0.00703	0.002178	0.009568	0.004253	0.007871	0.007697	0.00483	0.006977	0.003394	0.005415	0.008017	0.005898	0.009602	0.004019	0.005837	0.006908	0.004201	0.005486	0.009838	0.005952	0.007172	0.004491	0.006956	0.008212	0.007647	0.007712
215121_x_at	0.005301	0.006392	0.017432	0.01708	0.01907	0.006115	0.00911	0.018437	0.013278	0.012734	0.014896	0.015003	0.006115	0.023942	0.011833	0.017281	0.016416	0.017153	0.009316	0.019859	0.018266	0.016649	0.00988	0.016889	0.00285	0.020872	0.015312	0.016947	0.012008	0.018091	0.013901	0.016367	0.01651	0.019342	0.014841	0.019846	0.004591	0.019238	0.019414	0.016788	0.013718	0.019961	0.010659	0.018495	0.016087	0.005641	0.018367	0.020824	0.019209
215176_x_at	0.00182	0.00382	0.012064	0.010287	0.011555	8e-05	0.006131	0.013636	0.010054	0.007899	0.008903	0.012593	0.001285	0.018746	0.008098	0.00896	0.010628	0.012731	0.005518	0.01431	0.011149	0.012147	0.006815	0.011596	-0.001372	0.017482	0.011218	0.011157	0.007868	0.014815	0.015165	0.013005	0.011664	0.014517	0.009667	0.015713	0.000225	0.012034	0.014231	0.011482	0.010615	0.016015	0.00509	0.013928	0.010688	0.003174	0.0139	0.017713	0.015025
215193_x_at	0.020201	0.015481	0.013596	0.016231	0.014044	0.010862	0.014564	0.014934	0.013208	0.011323	0.013708	0.01369	0.015182	0.018272	0.014638	0.014463	0.01478	0.01581	0.011786	0.013631	0.012602	0.014502	0.014803	0.016624	0.012646	0.016942	0.013587	0.015414	0.015432	0.013226	0.016857	0.01184	0.017007	0.016365	0.015354	0.017339	0.012529	0.012607	0.015348	0.016411	0.014588	0.017461	0.015248	0.015128	0.015463	0.015993	0.016284	0.015932	0.015396
215214_at	-0.00673	-0.006047	0.002109	0.006692	0.005129	-0.004085	-0.004921	0.009778	0.001674	-0.001718	0.005155	0.00308	-0.004706	0.012862	0.000304	-0.000605	0.004435	-0.000928	-0.002489	0.003593	0.004277	0.002363	-0.002954	0.003258	-0.004657	0.010506	0.002255	0.00326	-0.001358	0.005816	0.00483	0.002797	0.002501	0.01001	0.001579	0.011455	-0.008977	0.003715	0.001622	0.000171	-7.7e-05	0.002475	-0.001303	0.004223	0.003719	-0.00361	0.006599	0.011407	0.006559
215313_x_at	0.021451	0.020763	0.016688	0.020213	0.017564	0.017064	0.016504	0.01658	0.016609	0.016547	0.015827	0.017262	0.016939	0.021138	0.016852	0.017558	0.016574	0.017312	0.019043	0.01658	0.01571	0.015813	0.017462	0.017118	0.01665	0.018007	0.016034	0.01664	0.017488	0.016856	0.018985	0.014974	0.016858	0.018266	0.017403	0.017187	0.015023	0.017342	0.017104	0.017742	0.016407	0.018005	0.016174	0.016861	0.018671	0.017933	0.016224	0.01851	0.016734
215379_x_at	0.001094	0.001673	0.010426	0.010543	0.015056	0.003415	0.007376	0.014198	0.009114	0.007212	0.00935	0.012181	0.002813	0.020724	0.00753	0.012004	0.011058	0.012782	0.00848	0.015768	0.012432	0.010484	0.007008	0.012944	0.001425	0.018943	0.009235	0.012418	0.007717	0.013631	0.011715	0.011028	0.009799	0.013931	0.011853	0.017634	0.002203	0.015246	0.017581	0.009641	0.009615	0.017722	0.006317	0.013567	0.00936	0.004842	0.015226	0.018416	0.01689
215524_x_at	-0.003628	-0.00927	-0.005429	-0.003691	-0.003267	-0.005451	-0.005626	-0.002277	-0.004853	-0.011359	-0.001941	-0.001601	-0.002678	-0.004721	-0.005595	-0.003141	-0.003696	-0.002218	-0.003257	-0.000482	-0.007574	-0.003438	-0.00356	-0.001649	-0.009634	-0.002193	-0.005851	-0.004727	-0.007164	-0.003862	-0.001153	-0.003578	-0.004868	-0.000827	-0.003626	-0.00169	-0.005424	-0.002683	-0.0046	-0.002521	-0.004728	-0.002353	-0.005273	-0.004766	-0.003305	-0.005959	-0.00273	-0.001224	-0.001059
215633_x_at	-0.002303	-0.002302	-0.001383	0.001792	0.000798	-0.003158	-0.000208	0.000886	-0.000574	-0.00126	0.000855	0.001359	0.00137	0.000958	0.001741	0.000138	0.002097	0.001402	-0.002376	-0.001523	-0.000586	-0.00076	0.000219	0.00111	-0.006549	0.003132	-0.001978	0.00191	0.001913	0.000556	0.003277	-0.001417	-0.000833	0.002697	0.000568	0.002477	-0.000507	0.001218	0.001593	-0.001451	-0.000227	0.004757	-0.00063	0.000365	0.000262	0.000833	0.002377	0.003695	0.001314
215806_x_at	-0.002002	0.004503	0.000897	0.002936	0.003275	-0.000758	0.001042	0.000933	0.002338	0.003154	0.002942	0.007173	-0.002248	0.005916	0.002309	0.001005	0.004112	0.002393	-0.000255	0.001908	-0.000437	0.004719	-0.002586	0.001304	-5e-06	0.003979	0.001302	0.000703	0.001834	0.004534	0.000933	-0.00028	0.00337	0.002695	-0.000498	0.005969	-0.00137	0.000802	0.005892	0.002332	0.001421	0.005276	0.003	-0.0005	0.000589	0.00019	0.00265	0.003944	0.005036
215946_x_at	0.00205	0.004414	0.007892	0.006678	0.010453	0.000809	0.003054	0.009923	0.005673	0.005059	0.006657	0.007948	0.000897	0.015245	0.005686	0.007938	0.006837	0.006839	0.003987	0.011515	0.009432	0.00801	0.004886	0.008232	0.00054	0.01363	0.006516	0.008485	0.005001	0.009046	0.009085	0.008488	0.006735	0.009776	0.006653	0.013517	0.000907	0.011163	0.01189	0.007853	0.00581	0.014236	0.004621	0.009277	0.00714	0.001549	0.008831	0.015845	0.010795
215949_x_at	-0.007724	-0.003753	0.002414	0.002309	0.003942	-0.003387	-0.002539	0.003856	0.000266	0.000549	0.002258	0.001868	-0.005183	0.010678	0.000556	0.005228	0.001963	0.004906	-0.007804	0.003439	0.001478	0.003664	-0.004533	0.003591	-0.006168	0.010844	-0.000228	0.001133	3.2e-05	0.006753	0.003349	0.002601	0.001841	0.009069	0.000528	0.008809	-0.002907	0.001581	0.004626	0.0016	0.002687	0.012436	-0.002083	0.002915	0.000906	-0.003853	0.005263	0.012961	0.008004
216191_s_at	-0.002193	0.001791	-0.004837	-0.00283	-0.003788	-0.003284	-0.003559	-0.004502	0.000555	-0.003556	-0.003391	-0.003814	-0.003598	0.003517	-0.004	-0.00385	0.000291	-0.003386	-0.005034	-0.002378	-0.003588	0.001093	-0.003592	0.000623	-0.003688	-0.000505	-0.004048	-0.004656	-0.003299	-0.00445	-0.003625	-0.002433	-0.001844	-0.002008	-0.001308	0.002546	-0.011794	-0.003946	0.003293	-0.003967	-0.001214	0.001222	-0.004938	-0.004429	-0.003851	-0.001948	0.001288	0.000621	0.00024
216207_x_at	0.005672	0.004375	0.010341	0.011932	0.012209	0.003421	0.004924	0.01486	0.008283	0.007482	0.007754	0.010584	0.003919	0.018756	0.006997	0.008874	0.00887	0.011469	0.007019	0.012558	0.011626	0.010569	0.00691	0.00909	0.003891	0.01729	0.009248	0.010324	0.006764	0.011978	0.011815	0.011283	0.009605	0.016962	0.007699	0.015267	0.003308	0.011671	0.013488	0.010249	0.006233	0.017455	0.007448	0.011994	0.010813	0.005202	0.013783	0.016616	0.016303
216231_s_at	0.023099	0.022161	0.017032	0.019965	0.017429	0.017708	0.017184	0.016925	0.017327	0.016962	0.016403	0.017768	0.017134	0.021091	0.016765	0.017734	0.016716	0.017468	0.019452	0.01776	0.01657	0.016655	0.017852	0.017982	0.017271	0.018343	0.016503	0.017224	0.017812	0.017211	0.018829	0.016583	0.017474	0.018199	0.017783	0.018243	0.01726	0.017804	0.017178	0.01823	0.016255	0.017771	0.0175	0.01768	0.018423	0.018296	0.017286	0.018313	0.017273
216250_s_at	0.005105	0.002654	0.003642	0.006011	0.005799	0.003647	0.005026	0.006473	0.004706	0.0037	0.004836	0.005307	0.00405	0.007755	0.005629	0.004446	0.005938	0.005687	0.003395	0.004379	0.003789	0.004713	0.003679	0.005901	0.003907	0.007935	0.004263	0.005044	0.005888	0.005443	0.006062	0.004048	0.005224	0.009682	0.004014	0.008898	0.002802	0.004928	0.004886	0.004943	0.004818	0.006978	0.004392	0.005354	0.004947	0.005445	0.006424	0.006809	0.006546
216365_x_at	-0.006004	-0.008747	-0.002585	0.001004	0.002741	-0.010916	-0.007823	0.000413	-0.007613	-0.007693	0.002477	0.000176	-0.008995	0.004266	-0.001646	-0.004209	0.004229	-0.00071	-0.007531	0.001211	-0.00195	-0.000184	-0.005924	-0.000533	-0.011198	0.009503	-0.001123	0.000787	-0.002218	0.000995	0.001637	0.000337	-0.002794	0.000845	-0.004157	0.007995	-0.011936	0.00191	0.006831	-0.001567	-0.001126	0.010133	-0.008521	0.001198	0.000875	-0.011817	0.001318	0.016343	0.004637
216401_x_at	-0.004353	-0.005172	0.006768	0.005523	0.00871	-0.004435	-0.002052	0.011133	0.003579	0.003257	0.004192	0.00794	-0.00745	0.017128	0.003506	0.001856	0.004619	0.006813	-4.6e-05	0.010728	0.007091	0.007975	0.003434	0.005466	-0.011201	0.014678	0.006773	0.008274	0.002343	0.010591	0.008196	0.008828	0.005638	0.011852	0.004349	0.012721	-0.006979	0.008083	0.008422	0.005934	0.003694	0.012285	-0.001129	0.009472	0.004534	-0.00185	0.008667	0.015329	0.011301
216412_x_at	-0.002689	-0.003881	0.000125	-0.001753	0.002304	-0.004993	-0.005644	0.000331	-0.003838	-0.007379	-0.00128	-0.000181	-0.006076	0.008131	-0.003661	0.000199	-0.001514	-0.000128	-0.003841	0.002275	0.001391	-0.00046	-0.003584	0.000212	-0.009412	0.00786	-0.003379	-0.000132	-0.009542	-0.001028	-0.001081	0.000544	-9.2e-05	-4.5e-05	-0.000452	0.004085	-0.008497	0.000257	0.005889	-0.001776	-0.001689	0.002978	-0.008598	0.001439	0.000794	-0.009922	0.000701	0.01238	0.002976
216430_x_at	-0.003627	-0.001093	-0.005837	-0.010545	0.001157	-0.010746	-0.006439	-0.003009	-0.006947	-0.005832	-0.004846	-0.003456	-0.013228	0.006191	-0.002758	-0.01099	-0.002427	-0.003898	-0.011704	0.000618	-0.001191	-0.00274	-0.01211	-0.005339	-0.011076	0.005388	-0.006124	-0.005113	-0.004494	-0.002042	-0.00268	-0.002477	-0.01161	0.000206	-0.01132	0.001786	-0.009894	-0.005444	0.001977	-0.012916	-0.011138	0.002115	-0.012575	-0.001976	-0.005755	-0.012657	0.001322	0.009966	0.000973
216491_x_at	-0.003405	-0.006378	0.006091	0.003963	0.008995	-0.003156	0.001527	0.009382	0.000834	0.004405	0.00274	0.004626	-0.002984	0.02051	0.002596	0.004311	0.006751	0.00787	0.001458	0.008291	0.006118	0.007379	0.000375	0.006204	-0.002837	0.016518	0.003498	0.005356	0.002085	0.008863	0.006562	0.007045	0.004432	0.005371	0.003657	0.013396	-0.002221	0.009576	0.011892	0.004826	0.004671	0.015907	0.001458	0.007908	0.005809	-0.002947	0.006743	0.016937	0.012263
216510_x_at	-0.005426	-0.005667	0.004322	0.003768	0.00455	-0.004955	-0.002098	0.00441	0.001229	0.001902	0.001678	0.002444	-0.003702	0.012767	0.001276	0.001918	0.001823	0.00784	-0.001496	0.004005	0.003469	0.004552	0.000653	0.004228	-0.009985	0.012104	0.002082	0.002877	0.001366	0.0075	0.005036	0.004054	0.002613	0.007821	0.003735	0.009345	-0.011665	0.004489	0.008313	0.004193	0.002948	0.011165	-0.000474	0.005597	0.002879	-0.002884	0.006521	0.01315	0.010325
216526_x_at	0.021138	0.019796	0.016079	0.020901	0.017699	0.017273	0.017124	0.016944	0.016959	0.016542	0.015949	0.018117	0.018183	0.022251	0.017774	0.018659	0.017022	0.018016	0.019636	0.017487	0.015971	0.016706	0.01786	0.01817	0.017084	0.019034	0.016807	0.0175	0.018217	0.017752	0.018748	0.016115	0.018693	0.018049	0.018199	0.018524	0.016166	0.017729	0.017199	0.018757	0.016833	0.018236	0.017567	0.016738	0.01852	0.017774	0.01697	0.018921	0.017972
216541_x_at	-0.005641	-0.007481	-0.002068	0.001123	-0.004537	-0.002582	-0.003702	-0.001901	-0.010871	-0.005314	-0.003266	-0.001705	-0.00535	0.00372	-0.009934	-0.005155	-0.001786	-0.004589	-0.002975	-7e-06	-0.003606	-0.005986	-0.006902	-0.000151	-0.011496	0.009102	-0.005203	-0.000703	-0.000277	-0.002953	0.001123	-0.000186	-0.006833	-0.009494	-0.003066	0.008223	-0.006671	-0.00368	0.006867	-0.003518	-0.002794	0.008521	-0.003828	-0.000612	0.000334	-0.011496	0.003461	0.012169	0.002424
216542_x_at	0.004024	0.003434	0.006088	0.005086	0.006699	0.003822	0.002592	0.005916	0.002818	0.003792	0.004135	0.005242	0.00139	0.011247	0.002591	0.005271	0.005612	0.006204	0.004512	0.006393	0.006293	0.004629	0.002852	0.004992	0.002017	0.012112	0.004593	0.00405	0.003682	0.006296	0.00669	0.005494	0.005784	0.008418	0.004529	0.008583	0.003579	0.005993	0.00647	0.004974	0.002854	0.013628	0.002363	0.006325	0.005606	0.003312	0.004581	0.009171	0.01014
216557_x_at	0.002247	0.00062	0.005477	0.004566	0.005828	-0.001845	4.6e-05	0.006459	0.002337	0.00247	0.002547	0.004164	-0.002326	0.013023	0.001662	0.003149	0.003342	0.007804	-0.001294	0.006082	0.005072	0.005509	0.000541	0.00395	-0.001278	0.013732	0.002727	0.004131	0.000957	0.007505	0.005931	0.005957	0.003147	0.009814	0.003311	0.01053	-0.001635	0.0051	0.008607	0.003108	0.000843	0.012791	0.000248	0.006252	0.003162	-0.000849	0.012219	0.013696	0.010182
216558_x_at	-0.003869	-0.005001	-0.003129	-0.005163	-0.004125	-0.007884	-0.009328	-0.00113	-0.001979	-0.003432	-0.003474	-0.003343	-0.006878	-7.8e-05	-0.004896	-0.002593	-0.004529	0.000175	-0.006622	-0.001155	-0.003671	-0.003266	-0.004233	-0.005081	-0.007716	0.001189	-0.001166	-0.003058	-0.003014	-0.001852	-0.000917	-0.003373	-0.003264	-0.001081	-0.004219	-0.00134	-0.004267	-0.007542	-0.001777	-0.003406	-0.003674	-0.000566	-0.007637	-0.003658	-0.00357	-0.005534	-0.004404	0.00079	-0.000651
216560_x_at	-0.007977	-0.009284	0.000742	0.004881	0.002903	-0.011448	-0.010103	0.007298	-0.00022	-0.01035	0.000695	0.003677	-0.011747	0.013557	-0.006955	-0.009275	0.00236	-0.005999	-0.009067	0.004371	0.002351	0.001127	-0.010631	-0.00083	-0.012368	0.010332	-0.002489	0.00194	-0.006262	0.006152	0.003438	0.001983	0.001261	0.009332	0.001758	0.010477	-0.010858	0.002265	0.003388	-0.007178	-0.003036	0.01582	-0.011417	0.004049	0.005093	-0.011517	0.008732	0.012788	0.00453
216565_x_at	0.004791	0.005748	0.00504	0.009903	0.003846	0.009883	0.005901	0.004732	0.006208	0.003772	0.004602	0.003916	0.007349	0.006305	0.007478	0.006369	0.005143	0.003714	0.008399	0.005117	0.003524	0.005139	0.00846	0.006115	0.005717	0.006826	0.005348	0.005417	0.005694	0.005859	0.004824	0.004661	0.007332	0.00618	0.004284	0.004574	0.00462	0.005412	0.004074	0.004966	0.004339	0.007068	0.005508	0.00525	0.00674	0.006414	0.004623	0.005428	0.006768
216573_at	-0.001443	-0.009032	-0.003975	-0.011329	-0.003528	-0.010182	-0.006709	-0.002001	-0.010906	-0.005507	-0.004397	-0.008475	-0.010629	0.0014	-0.004633	-0.006016	-0.004422	-0.003939	-0.004715	-0.003543	-0.001945	-0.003556	-0.006317	-0.005239	-0.005154	0.000987	-0.004603	-0.003007	-0.014925	-0.003551	-0.003313	-0.003283	-0.004281	-0.004698	-0.005963	-0.001119	-0.00778	-0.003704	-0.001361	-0.002504	-0.005867	-0.002547	-0.009855	-0.002894	-0.002852	-0.006453	0.000783	0.002435	-0.00138
216576_x_at	-0.005683	-9.1e-05	0.00775	0.006523	0.009781	-0.002364	9e-06	0.008522	0.004875	0.00439	0.005194	0.007622	-0.004489	0.016322	0.005999	0.004093	0.006043	0.008554	0.001657	0.011455	0.00651	0.008824	0.002465	0.007137	-0.001992	0.016112	0.006189	0.00971	0.003615	0.008491	0.010237	0.008341	0.007784	0.01082	0.005635	0.014875	-0.005329	0.009043	0.009512	0.006109	0.004005	0.016629	0.001986	0.009657	0.005825	-0.001415	0.011251	0.016126	0.012915
216598_s_at	0.002093	-0.006147	0.003092	0.008449	0.00594	0.004478	0.006136	0.00667	0.008574	-0.000329	0.003876	0.006288	0.001721	0.007398	0.00405	0.006169	0.006524	0.003215	0.001429	0.005111	0.005294	0.002432	0.00341	0.006813	0.003006	0.009708	0.003744	0.003651	0.004629	0.005595	0.008712	0.002955	0.002616	0.007331	0.002342	0.006523	0.005258	0.002302	0.005041	0.002502	0.003504	0.009368	0.001127	0.007755	0.008906	0.006805	0.007836	0.007906	0.006956
216829_at	-0.003621	-0.003543	-0.009538	-0.002433	-0.000952	-0.008687	-0.01059	0.000499	-0.005556	-0.007662	-0.006115	-0.003389	-0.011145	0.00784	-0.011667	-0.009394	-0.004799	-0.002537	-0.011044	-0.000979	-0.002845	-0.001094	-0.011216	-0.004539	-0.013097	0.005432	-0.002175	-0.001419	-0.013501	-0.002362	-0.002825	-0.002111	-0.005805	-0.002727	-0.005406	0.005081	-0.012727	-0.002184	-0.000672	-0.007702	-0.002968	0.003325	-0.010981	-0.000589	-0.003049	-0.008588	-0.000401	0.007404	-0.000886
216846_at	-0.006201	-0.007235	-0.009692	-0.010353	-0.009542	-0.009153	-0.009945	-0.00608	-0.011162	-0.008543	-0.009749	-0.010143	-0.00996	-0.003127	-0.010779	-0.009407	-0.009283	-0.00914	-0.009976	-0.008055	-0.008751	-0.009434	-0.009293	-0.010078	-0.010458	-8e-06	-0.011002	-0.009784	-0.010736	-0.006961	-0.009975	-0.010297	-0.008615	-0.00852	-0.00899	0.001092	-0.00973	-0.010515	-0.007524	-0.010444	-0.010762	-0.002282	-0.009357	-0.009526	-0.008814	-0.009126	-0.008533	0.006814	-0.001587
216853_x_at	-0.006378	-0.001481	0.00082	0.00344	0.00595	-0.01064	-0.002411	0.005117	-0.000329	-0.001544	0.0057	0.00302	-0.005217	0.010659	-0.00153	-0.002449	0.005464	0.003192	-0.002179	0.004203	0.001731	0.004721	-0.000958	0.003589	-0.007645	0.013451	0.001838	0.003859	0.00054	0.002863	0.006444	0.002879	0.001101	0.001401	-0.000297	0.011641	-0.009006	0.003822	0.010363	0.001266	-0.002431	0.011571	-0.001289	0.005188	0.002358	-0.008645	0.003989	0.018513	0.009564
216892_at	-0.002696	-0.006058	-0.002703	-0.002404	-0.00112	-0.006965	-0.008721	-0.001879	-0.003093	-0.003965	-0.004859	-0.001715	-0.012228	-0.00475	-0.007199	-0.003829	-0.003508	-0.002323	-0.010063	-0.000752	-0.006397	-0.004875	-0.003036	-0.002124	-0.005917	5e-06	-0.003651	-0.003189	-0.007771	-0.002384	-0.00241	-0.004167	-0.005811	-0.000443	-0.004755	-0.000797	-0.004322	-0.001624	-0.001656	-0.002012	-0.004835	0.002601	-0.004635	-0.001565	-0.002822	-0.004307	-0.000377	0.000949	6.2e-05
216920_s_at	3.6e-05	0.004148	0.001071	0.000697	0.002925	-0.000633	0.000873	0.001172	0.001532	0.001908	0.002	0.008039	-0.000465	0.005714	0.002666	0.001113	0.003154	0.000166	-0.001709	0.00204	-0.001645	0.002776	-0.001432	0.000684	0.000301	0.002776	0.001353	0.000609	0.000683	0.00495	0.00132	-0.000766	0.003022	0.00429	0.001235	0.005013	-0.003355	0.00018	0.004564	0.002152	0.000658	0.004272	0.002186	-0.000582	-0.000169	-0.002063	0.002595	0.003692	0.00405
216950_s_at	0.004194	0.001895	0.001805	0.006185	0.003708	0.002182	0.003454	0.000765	0.003208	0.003252	0.002794	0.000242	0.004353	0.005208	0.001861	0.002966	0.003898	0.004538	0.002962	0.001054	-0.000437	0.002052	0.003587	0.004801	0.000918	0.006732	0.001358	0.003968	0.002991	0.001429	0.004861	0.000496	0.003351	0.005804	0.001924	0.001569	0.002807	0.003357	0.000955	0.00291	0.002998	0.006128	0.003107	0.002512	0.004618	0.005664	0.006208	0.005457	0.000647
216984_x_at	-0.004565	-0.005062	0.008225	0.004355	0.010564	-0.006504	0.00152	0.008912	0.004119	0.003198	0.002171	0.008128	0.000159	0.014783	0.0039	0.008499	0.003187	0.007678	0.000439	0.011133	0.010377	0.010471	0.003748	0.005524	-0.007566	0.016923	0.002114	0.006645	0.005468	0.008142	0.009919	0.009608	0.006525	0.007154	0.006918	0.015737	-0.006136	0.011443	0.015652	0.005258	0.003891	0.016572	0.001677	0.009587	0.004134	-0.001695	0.008158	0.018037	0.01369
217022_s_at	-0.006756	0.006246	0.017744	0.015927	0.017808	0.002968	0.011737	0.017907	0.01464	0.015188	0.015397	0.016748	0.001695	0.019723	0.015867	0.015666	0.016271	0.014046	0.014512	0.018937	0.01744	0.017329	0.01358	0.015901	0.004755	0.01939	0.017168	0.016894	0.015468	0.017044	0.01804	0.017366	0.017315	0.01636	0.017588	0.018708	0.007622	0.019063	0.016206	0.01719	0.011363	0.014809	0.015951	0.017233	0.014137	0.010204	0.013206	0.017583	0.017837
217084_at	-0.010455	-0.01192	-0.012785	-0.005318	-0.004473	-0.01222	-0.007338	-0.006926	-0.012698	-0.005811	-0.012336	-0.012959	-0.012682	-0.00275	-0.012492	-0.011494	-0.006068	-0.002516	-0.010925	-0.010156	-0.009375	-0.004049	-0.007869	-0.004037	-0.007344	-0.001365	-0.0128	-0.008454	-0.014421	-0.0055	-0.013859	-0.00347	-0.006671	-0.004472	-0.009271	-0.001855	-0.012052	-0.003838	-0.003994	-0.013016	-0.012362	-0.003979	-0.014484	-0.006341	-0.007799	-0.007178	-0.00324	0.00019	-0.001418
217143_s_at	0.000286	0.001066	-0.001573	0.000718	2.1e-05	-0.002078	-0.000999	-0.000993	0.002076	-0.002765	0.000132	0.000261	-0.002385	0.006384	0.000364	3.5e-05	0.003727	0.001395	-0.003262	0.001052	-2.1e-05	0.002059	-0.001641	0.002753	-0.001519	0.003239	-0.001253	-0.000945	0.000422	0.000228	-0.000172	-0.00062	0.003046	0.001	-0.000351	0.004813	-0.005387	-0.001188	0.005002	-0.001056	-0.000471	0.004688	-0.00158	-0.000844	-0.001332	-0.00023	0.003467	0.002488	0.003145
217147_s_at	-0.0026	-0.005923	-0.007582	-0.005846	-0.003714	-0.011441	-0.005496	-0.004785	-0.005	-0.015116	-0.005176	-0.006262	-0.005829	-0.004946	-0.00483	-0.009081	-0.003791	-0.002874	-0.00627	-0.005617	-0.014445	-0.003579	-0.00857	-0.00745	-0.018669	-0.002589	-0.017015	-0.009954	-0.005019	-0.005446	-0.004136	-0.007408	-0.006358	-0.004486	-0.007809	0.001535	-0.012977	-0.008468	-0.002831	-0.009476	-0.003856	-0.002824	-0.007781	-0.016409	-0.017337	-0.007356	-0.001611	-0.003836	0.00128
217148_x_at	-0.00433	0.002316	0.010928	0.008092	0.013471	0.000615	0.004244	0.011168	0.006814	0.006869	0.006846	0.012496	0.002823	0.018083	0.006472	0.009979	0.006807	0.0098	0.004542	0.012638	0.011188	0.010866	0.005197	0.008999	-0.00064	0.017287	0.007445	0.010132	0.008	0.011387	0.010834	0.010762	0.008317	0.011435	0.008899	0.016719	0.001542	0.011663	0.015781	0.007777	0.007208	0.01723	0.005862	0.011721	0.007848	0.00419	0.011243	0.018497	0.014344
217157_x_at	-0.005029	-0.001405	0.005242	0.005643	0.004797	-0.002852	0.000517	0.006576	0.004266	0.003355	0.002695	0.005355	-0.001137	0.012897	0.002604	0.003244	0.003898	0.006373	0.001193	0.006192	0.004719	0.005324	0.003421	0.004371	-0.001195	0.012757	0.003825	0.005635	0.001936	0.006701	0.007883	0.006017	0.004475	0.007006	0.003334	0.009981	-0.000716	0.006491	0.006678	0.004795	0.003138	0.010228	0.0021	0.006325	0.004383	0.000791	0.010128	0.016962	0.008998
217179_x_at	-0.005487	-0.006656	0.004578	0.004798	0.005252	-0.002434	0.001443	0.007739	0.00073	0.001468	0.000278	0.004424	-0.002557	0.011614	0.000751	0.002341	0.002797	0.003995	0.000488	0.007857	0.004458	0.005268	0.000984	0.004022	-0.001502	0.014696	0.004977	0.00321	0.002006	0.006725	0.005167	0.004125	0.002032	0.008961	0.00265	0.006925	-0.011401	0.008562	0.010724	0.004564	0.000177	0.012336	-0.000274	0.005838	0.003146	-0.003618	0.003508	0.012207	0.009381
217192_s_at	-0.005898	-0.004112	-0.003532	0.000646	-0.002394	-0.003349	-0.001995	-0.004196	-0.001664	-0.005211	-0.005899	-0.002269	-0.001883	-0.000215	-0.001947	-0.00104	-0.003136	-0.00528	-0.001881	0.000415	-0.005083	-0.003815	-0.002533	-0.000124	-0.005458	0.002424	-0.008854	-0.002078	-0.002273	-0.001077	0.000485	-0.003404	-0.001089	-0.00501	-0.007624	-0.008953	-0.004992	-0.005711	-0.002723	-0.002501	-0.002724	0.001073	-0.002528	-0.004635	-0.002542	-0.002824	-0.001353	0.000972	-0.000192
217198_x_at	-0.000784	-0.00064	-0.001507	-0.001997	0.001848	-0.009582	-0.007121	0.001442	-0.004199	-0.001477	-0.002833	-0.001166	-0.007653	0.00895	-0.002311	-0.00063	1.8e-05	-0.000461	-0.011245	-0.00074	-0.00018	-0.000277	-0.004773	0.000499	-0.006911	0.007379	-0.00254	-0.001267	-0.002036	0.000918	0.001752	-0.002531	-0.0032	0.000102	-0.002137	0.002669	-0.011444	0.000477	0.000675	-0.00085	0.001225	0.000885	-0.004507	0.000595	-0.001375	-0.002644	-0.001051	0.00586	0.002793
217217_at	-0.00789	-0.00885	-0.013398	-0.012199	-0.010846	-0.011237	-0.011235	-0.007187	-0.013858	-0.012173	-0.012675	-0.010425	-0.012729	-0.006946	-0.013634	-0.013425	-0.006114	-0.011692	-0.012248	-0.004971	-0.013991	-0.010684	-0.012278	-0.012814	-0.012949	-0.000285	-0.008104	-0.011596	-0.012008	-0.012581	-0.013622	-0.01357	-0.013631	-0.010521	-0.011341	-0.004584	-0.012862	-0.006768	-0.005467	-0.013605	-0.011876	-0.00012	-0.012953	-0.011243	-0.010618	-0.013427	-0.012133	-0.001639	-0.006275
217227_x_at	-0.00529	-0.004553	0.001231	0.003131	0.006859	-0.004687	-0.000344	0.005357	0.000471	0.000532	0.000266	0.000494	-0.00253	0.012337	-0.000428	0.001852	0.001473	0.003163	-0.000128	0.004954	0.002327	0.003964	-0.00031	0.003212	-0.001292	0.012554	0.00167	0.001303	-0.00077	0.004699	0.003229	0.003586	0.001271	0.005715	0.000584	0.007884	-0.001688	0.004016	0.008527	0.001521	-0.000479	0.009776	-0.000507	0.00295	0.002357	-0.002058	0.003365	0.015129	0.008033
217235_x_at	0.003298	0.000934	0.005752	0.004371	0.010543	0.001623	0.001904	0.005676	0.000445	0.002543	0.003697	0.007278	0.001773	0.010217	0.000599	0.008253	0.002871	0.007538	0.001521	0.010214	0.008126	0.006879	0.004006	0.005835	0.001247	0.013292	0.002159	0.007064	0.002151	0.00637	0.004537	0.00683	0.003872	0.003558	0.005362	0.010756	0.00043	0.00624	0.011794	0.002985	0.002515	0.011897	0.002824	0.006031	0.002887	-0.000629	0.008113	0.016026	0.008763
217236_x_at	-0.00495	-0.000354	0.000845	-0.000388	0.002589	-0.00228	-0.000985	0.001736	0.001165	0.00051	-0.00056	-0.000411	-0.003583	0.007679	-6.6e-05	0.000884	0.000882	0.002595	0.000669	0.003967	0.000176	0.002014	0.001029	0.001524	-0.003741	0.006872	0.001753	0.001408	0.000565	0.002536	0.001335	0.001405	0.001535	0.002076	-0.000271	0.004022	-0.004952	0.001952	0.00279	0.003002	0.000903	0.00466	0.001303	0.001108	0.000105	-0.003023	0.002541	0.005701	0.003443
217258_x_at	-0.004867	-0.007257	0.000263	-0.000398	0.004896	-0.002546	-0.007381	0.004334	-0.001099	-3.8e-05	0.001465	-0.0003	-0.005977	0.011927	-0.003572	0.001027	-0.000118	0.00335	-0.000694	0.004429	0.000368	0.001146	-0.001526	0.00214	-0.012992	0.011559	0.000496	0.001485	-0.001302	0.000766	0.003059	0.002734	-0.001828	0.001095	0.000274	0.006915	-0.003163	0.003669	0.009097	0.001707	-0.000323	0.005581	-0.002311	0.00276	0.002569	-0.002388	0.004443	0.014999	0.006085
217281_x_at	-0.002726	-0.00742	0.005744	0.004182	0.004144	-0.0094	-0.001482	0.004247	0.001941	0.002739	0.001771	0.003526	-0.006935	0.012312	0.000576	0.002322	0.003271	0.007159	-0.003489	0.005334	0.00485	0.005219	0.000723	0.00418	-0.012775	0.011772	0.003314	0.003801	0.001712	0.007179	0.004941	0.006028	0.003219	0.010287	0.003727	0.009187	-0.009709	0.004395	0.010753	0.002901	0.000939	0.01201	0.000121	0.004169	0.003702	-0.002085	0.008184	0.011629	0.009003
217320_at	-0.006257	-0.002557	7.5e-05	-0.006833	-0.011885	-0.004581	-0.010618	0.000239	-0.004055	-0.01163	-0.007907	-0.00319	-0.01077	-0.000897	-0.00493	-0.015113	-0.005194	-0.007847	-0.012887	-0.003461	-0.000369	-0.000887	-0.012105	-0.004977	-0.015047	0.005367	-0.003106	-0.004199	-0.006125	-0.001258	-0.004766	9.2e-05	-0.003123	-0.003311	-0.004097	0.000927	-0.014828	0.000408	-0.003569	-0.003331	-0.010744	0.010349	-0.012474	-0.001876	-0.014296	-0.007392	0.008494	-0.000677	-0.000413
217360_x_at	-0.003873	-0.008847	-0.002697	-0.005337	-0.000397	-0.010015	-0.008506	5.8e-05	-0.008352	-0.00595	-0.00282	-0.002291	-0.014136	0.000569	-0.003622	0.002666	-0.002603	0.001422	-0.007863	0.000546	-0.000797	-0.000649	-0.008955	-0.002183	-0.013084	0.004728	-0.002717	-0.008396	-0.009208	0.004511	0.001592	-0.001773	-0.002429	0.005435	-0.008358	0.004632	-0.011009	-0.004384	0.001004	-0.003099	-0.00409	0.006454	-0.010486	0.000996	-0.003195	-0.011047	-0.002397	0.007017	0.002658
217369_at	0.006091	0.002806	0.005418	0.006299	0.004171	0.000494	0.002949	0.004218	0.004482	0.006468	0.00406	0.003206	-0.000484	0.006649	0.003388	0.00543	0.004519	0.004889	0.00383	0.007128	0.004706	0.003895	0.004014	0.005122	0.002138	0.009843	0.003685	0.004656	0.003004	0.004316	0.004838	0.004579	0.004629	0.007218	0.004474	0.005357	0.001737	0.004019	0.004791	0.004346	0.000942	0.010267	0.004374	0.005926	0.004607	0.003968	0.004323	0.006604	0.00561
217378_x_at	-0.005154	-0.005183	0.00862	0.010727	0.011167	-0.01072	0.003034	0.010258	0.005179	0.005368	0.005225	0.008661	-0.002209	0.020987	0.00617	0.00614	0.006279	0.011369	-0.000361	0.012321	0.010243	0.009688	0.005155	0.009643	-0.006763	0.018894	0.00676	0.008317	0.005852	0.011906	0.011447	0.009388	0.008357	0.011392	0.006744	0.014486	-0.00967	0.01211	0.010082	0.008598	0.005655	0.015802	0.004065	0.008724	0.008723	-0.002806	0.012666	0.018389	0.013596
217384_x_at	-0.006533	-0.006993	-0.001265	-0.006137	0.000101	-0.008736	-0.009863	-0.000457	-0.005075	-0.002845	-0.004262	-0.00486	-0.007715	0.007376	-0.009784	-0.002221	-0.004917	0.000384	-0.010114	-0.00044	-0.001349	-0.000771	-0.004383	-0.004119	-0.009795	0.004814	-0.005356	-0.001038	-0.004482	0.000157	-0.001544	-0.001615	-0.003474	0.003214	-0.003173	0.002027	-0.005896	-0.000203	0.00089	-0.002766	-0.002074	0.003658	-0.007134	-0.000474	-0.002049	-0.012232	-0.001339	0.005544	0.003599
217390_x_at	-0.002704	0.002328	0.001249	-3.8e-05	0.001107	-0.006139	-0.001006	-0.000351	-0.001834	-0.000569	0.001467	0.00026	-0.001763	0.004481	-0.001929	0.000968	0.000506	0.000977	-0.000949	0.001371	0.000518	0.000397	-0.001011	-0.000892	-0.008083	0.002498	0.00012	-0.000732	-0.000854	0.000628	-0.000444	0.000658	-0.000467	0.002575	0.000163	0.001882	-0.000472	0.001814	0.001118	-0.001323	-0.003322	0.00231	-0.000403	0.001018	0.000695	-0.000589	0.002583	0.00124	0.002453
217418_x_at	0.000388	-0.004902	-0.001439	-0.003688	0.002885	-0.005559	-0.005706	0.004088	-0.001351	-0.008404	0.002776	0.003443	-0.009035	0.003018	0.003843	0.002105	-0.000422	0.001823	-0.00222	-0.003747	-0.001605	0.005565	-0.008091	0.002743	-0.004525	0.002444	-0.001635	-0.001381	0.000672	-0.001563	-0.000179	0.001939	0.000367	-0.00061	0.001193	0.012151	-0.004567	-0.000694	0.004629	0.000223	-0.003821	0.001653	-0.005822	-0.000516	-0.002749	-0.007043	0.005338	0.003414	0.008025
217436_x_at	0.011302	0.009412	0.006838	0.01402	0.009446	0.008833	0.008998	0.007277	0.007995	0.008005	0.0071	0.007894	0.011103	0.013709	0.008873	0.008574	0.009206	0.010384	0.010944	0.007997	0.006546	0.009016	0.009385	0.00989	0.007994	0.011787	0.007408	0.009145	0.010415	0.010168	0.009688	0.006422	0.009903	0.009636	0.009607	0.010259	0.006302	0.008758	0.00937	0.008637	0.010032	0.011938	0.007408	0.00779	0.011804	0.009507	0.009262	0.01029	0.010675
217456_x_at	0.009877	0.005204	0.00663	0.011452	0.008639	0.006548	0.007736	0.007182	0.008272	0.006977	0.007741	0.008276	0.008309	0.011743	0.00841	0.008175	0.008238	0.008346	0.009235	0.007559	0.007179	0.007731	0.007977	0.008751	0.008113	0.009833	0.006975	0.007929	0.008815	0.008602	0.009735	0.006956	0.009117	0.009631	0.00733	0.010165	0.00763	0.007814	0.008525	0.008609	0.008399	0.00896	0.007406	0.007509	0.009922	0.007943	0.008724	0.009628	0.008828
217478_s_at	0.007433	0.00763	0.0079	0.009497	0.008524	0.006885	0.008596	0.010213	0.009466	0.006748	0.00874	0.007622	0.008862	0.011784	0.009408	0.008348	0.010394	0.009762	0.00713	0.009334	0.007403	0.008852	0.008072	0.010514	0.00644	0.012276	0.008047	0.009038	0.009412	0.007659	0.009805	0.006328	0.010155	0.009945	0.009589	0.012004	0.006792	0.008712	0.010263	0.009273	0.007489	0.011135	0.009288	0.009593	0.00842	0.010339	0.010175	0.011283	0.010039
217480_x_at	0.001739	0.001373	0.007425	0.007228	0.008981	-0.000254	0.003657	0.009698	0.005473	0.004555	0.005479	0.007585	0.001179	0.017116	0.005011	0.004921	0.006353	0.008408	0.004542	0.009119	0.007109	0.007977	0.003099	0.00718	0.001239	0.016593	0.006651	0.008297	0.004996	0.011934	0.009576	0.008804	0.006806	0.009679	0.005937	0.013102	0.000377	0.008844	0.009479	0.00778	0.005294	0.015581	0.00291	0.009542	0.006811	0.002924	0.011186	0.014748	0.012574
217502_at	0.00464	-0.000356	0.000457	0.006617	0.000365	0.001164	0.004599	-0.000981	0.001209	-0.000248	0.001449	0.003061	0.002801	0.004661	0.002127	0.00271	0.001369	0.000981	0.003273	-0.000321	-0.001325	0.002003	0.005946	0.000617	0.002538	0.004374	-1.4e-05	0.001763	0.002899	0.003831	0.001123	0.000384	0.002187	0.005107	0.001305	0.001141	0.001913	0.000491	0.001045	-0.00034	0.00419	0.003445	-0.00015	0.001731	0.004729	0.000727	0.002637	0.00254	0.003542
217549_at	-0.005951	-0.007509	-0.002136	-0.001603	-0.001823	-0.006687	-0.002564	-0.000535	0.000968	-0.004925	-0.000723	-0.000362	-0.002241	-0.000374	0.000746	-0.004171	0.000403	0.000447	-0.003324	-0.00351	-0.002994	-0.002251	-0.006388	-0.003135	-0.002287	0.00057	-0.002326	0.000728	0.000244	-0.000479	0.000456	-0.00281	-0.007951	-0.001154	-0.001859	0.001557	-0.005456	-0.005146	0.00058	-0.001431	-0.004379	0.000253	0.000292	-0.000786	-0.007934	-0.000275	-0.002931	0.00184	-0.000336
217933_s_at	0.00914	0.009651	0.007014	0.011185	0.00959	0.009521	0.010148	0.009063	0.009488	0.008916	0.009547	0.009037	0.010066	0.014271	0.008473	0.009089	0.010401	0.010179	0.010395	0.009026	0.008898	0.010363	0.010808	0.010405	0.010384	0.012154	0.008529	0.008168	0.008364	0.009459	0.010856	0.00944	0.010123	0.011123	0.009042	0.011176	0.008819	0.008694	0.01	0.009591	0.01133	0.012241	0.007696	0.008855	0.01031	0.007862	0.012057	0.01158	0.010805
217992_s_at	0.003369	0.003441	0.001072	0.00384	0.00382	0.003282	0.004007	0.005594	0.002936	0.002585	0.003282	0.003663	0.003791	0.006235	0.004124	0.004282	0.004616	0.003501	0.003535	0.003791	0.002641	0.003492	0.002352	0.004147	0.003075	0.005105	0.002597	0.004009	0.005075	0.002559	0.004677	0.001447	0.003272	0.005704	0.005141	0.005136	0.004396	0.004489	0.003922	0.003897	0.005269	0.003874	0.002798	0.002155	0.003057	0.002809	0.004934	0.00536	0.00464
218232_at	0.006507	0.009	0.006616	0.011425	0.008894	0.008144	0.00993	0.009382	0.010933	0.006964	0.007806	0.009546	0.009287	0.012631	0.008841	0.006975	0.009031	0.011651	0.006914	0.009991	0.005999	0.008069	0.008209	0.010364	0.006245	0.012895	0.005561	0.009784	0.009261	0.009215	0.011757	0.005181	0.008761	0.012277	0.008855	0.012721	0.008924	0.007602	0.010273	0.008653	0.010465	0.012999	0.009636	0.009978	0.008425	0.009922	0.011452	0.012183	0.010612
218400_at	0.008014	0.005844	0.002661	0.009252	0.003286	0.004126	0.006729	0.003948	0.004698	0.001696	0.004825	0.003588	0.007552	0.006662	0.006304	0.004913	0.002838	0.004546	0.010412	0.00288	0.001236	0.003862	0.007938	0.005071	0.005048	0.007039	0.002631	0.004154	0.00667	0.006909	0.003706	0.002085	0.007051	0.008195	0.003428	0.004808	0.007422	0.003825	0.003435	0.00308	0.006974	0.006254	0.003383	0.002709	0.006481	0.003553	0.004615	0.007312	0.006447
218429_s_at	0.001514	0.002382	0.004722	0.007606	0.004452	0.003109	0.004222	0.005241	0.003571	0.003525	0.004076	0.005266	0.004785	0.00571	0.005124	0.004484	0.004084	0.004226	0.005943	0.003081	0.00389	0.006607	0.006119	0.004009	0.005075	0.006025	0.003454	0.003694	0.004861	0.003708	0.004732	0.004196	0.007855	0.0044	0.005008	0.005937	0.004114	0.004893	0.003373	0.004723	0.004997	0.005628	0.004081	0.004405	0.004702	0.004573	0.005552	0.005233	0.005078
218543_s_at	0.007308	0.005222	0.004586	0.008236	0.005647	0.005068	0.005516	0.005146	0.004621	0.003036	0.00454	0.004613	0.005427	0.006434	0.006214	0.005336	0.004165	0.005774	0.007044	0.004363	0.002829	0.004824	0.007274	0.006304	0.005405	0.007205	0.00321	0.004103	0.007047	0.006208	0.005814	0.003544	0.005792	0.006858	0.003766	0.004006	0.005332	0.00535	0.005008	0.004974	0.006348	0.007525	0.005681	0.005274	0.007467	0.004725	0.005239	0.006474	0.005623
218805_at	0.004648	0.00472	0.003415	0.004977	0.004303	0.003132	0.003564	0.005259	0.004928	0.001593	0.003191	0.004675	0.003539	0.007499	0.005009	0.003734	0.003615	0.004858	0.00229	0.005328	0.004174	0.004336	0.002675	0.004656	0.002505	0.006529	0.002104	0.003339	0.00413	0.003875	0.006297	0.003375	0.005006	0.006309	0.003665	0.007648	0.002558	0.003656	0.005294	0.003585	0.003529	0.006362	0.003184	0.004648	0.00344	0.003939	0.006667	0.00572	0.00772
218870_at	0.00196	0.002095	0.000178	0.001694	0.002659	-0.000107	0.001319	0.003508	0.001995	0.000526	0.001995	0.001509	0.00201	0.003859	0.002443	0.00115	0.002399	0.002517	0.000375	0.002486	0.000459	0.001531	0.001546	0.001984	-0.000149	0.001315	0.000694	0.00251	0.002495	0.001439	0.002325	0.000952	0.001986	0.002351	0.001468	0.007078	0.000274	0.001552	0.002963	0.000755	0.001103	0.00257	0.000921	0.002133	-0.000757	0.000509	0.001902	0.002203	0.005062
218943_s_at	-0.002869	-0.003364	0.000504	0.00347	0.000498	-0.000266	0.002233	0.001327	-0.001598	-0.003002	0.001546	0.001555	0.004062	0.003824	0.002396	0.001076	0.000115	0.000311	0.003792	-0.004423	-0.00098	0.001634	0.006112	-2.8e-05	-0.001053	0.001937	2.3e-05	0.0005	0.001383	0.003287	-0.000645	0.000743	0.003513	0.004265	0.00041	0.000854	0.001319	-0.000917	0.000124	0.000448	0.003609	0.003327	0.000396	0.001309	0.002933	-0.000367	0.000926	0.001371	0.002052
218986_s_at	0.001629	0.007292	0.003431	0.006729	0.0021	0.001741	0.003959	0.002607	0.001007	-0.000681	-2.2e-05	0.003354	0.007273	0.00341	0.00343	0.003581	0.003098	0.002246	0.005935	0.002292	0.00164	0.005976	0.007862	0.002419	0.005584	0.004887	0.000603	0.002052	0.004392	0.005389	-6e-06	0.001752	0.00721	0.005597	0.000485	0.003962	-0.000314	0.003368	0.002095	0.001947	0.00492	0.006141	0.003216	0.001712	0.004448	0.000206	0.003903	0.003806	0.005161
218999_at	0.004217	-0.00056	0.000487	0.004131	0.002643	0.003156	0.002208	0.00246	0.004015	0.000427	0.001202	0.001072	0.001576	0.003994	0.001845	0.001756	0.002289	0.001588	0.000661	0.003719	0.001535	0.002162	0.003134	0.001857	0.001443	0.003626	0.000976	0.002097	0.001255	0.001669	0.003254	0.00144	0.002998	0.003545	0.002483	0.003954	0.000806	0.001809	0.001881	0.002523	0.000697	0.00352	0.002028	0.001969	0.00234	0.002466	0.003495	0.003652	0.002681
219014_at	0.002935	0.000379	3.6e-05	0.001225	0.002696	-0.000206	0.002454	0.007021	0.001021	-0.003463	0.000786	0.003064	-0.001095	0.00523	0.002538	0.001066	0.001741	0.00357	0.000361	-0.000136	0.001121	0.005044	-0.001862	0.003551	-0.001014	0.004499	0.00084	0.002149	0.002305	0.004226	0.002229	7.9e-05	0.002863	0.001362	0.002697	0.009237	-0.001181	0.002509	0.004711	0.001497	0.000906	0.003715	0.002234	0.000653	0.000443	-0.001965	0.004127	0.003457	0.007616
219117_s_at	0.008748	0.008697	0.005797	0.008366	0.006986	0.007979	0.006246	0.005423	0.006592	0.006331	0.00529	0.00419	0.005775	0.009793	0.005513	0.004818	0.006641	0.005385	0.006527	0.007705	0.007458	0.0071	0.003698	0.005774	0.008828	0.011255	0.006799	0.005803	0.005404	0.005603	0.007041	0.007248	0.005686	0.008213	0.00406	0.008457	0.006396	0.008115	0.006663	0.005512	0.0032	0.011076	0.005345	0.006712	0.00677	0.005406	0.006965	0.010677	0.007112
219118_at	0.005709	0.004048	0.003855	0.005219	0.003562	0.004247	0.003547	0.003426	0.00308	0.003741	0.002358	0.001005	0.002584	0.007736	0.002745	0.002761	0.004224	0.002421	0.001999	0.004192	0.004765	0.00421	0.001317	0.002664	0.005122	0.008671	0.002922	0.002816	0.002539	0.002542	0.002578	0.004424	0.001286	0.004793	0.001252	0.005809	0.004053	0.005485	0.004102	0.001728	0.000452	0.008875	0.002471	0.003867	0.002952	0.003529	0.00413	0.008747	0.005081
219159_s_at	-0.003023	-0.002456	-0.001339	-0.001424	-0.002393	-0.0055	-0.001696	-0.000397	-0.008529	-0.012925	-0.003969	-0.001378	-0.004223	0.003821	-0.006333	-0.008445	-0.001583	-0.00047	-0.006614	-0.010154	-0.008402	-0.001476	-0.00802	-0.001967	-0.007708	0.003155	-0.007416	-0.002278	-0.002243	-0.004083	-0.001472	-0.001625	-0.003155	0.001593	-0.002668	0.00294	-0.006283	-0.004234	-0.001554	-0.005275	-0.000214	0.005281	-0.004959	-0.004597	-0.002879	-0.005221	0.004096	0.005084	0.000761
219183_s_at	0.004357	0.000947	0.001817	0.002125	0.002004	0.000454	0.002086	0.002425	0.001453	-0.000388	7.6e-05	0.000411	0.002182	0.003963	0.001086	0.000839	0.001969	0.001982	0.001779	0.00225	0.000565	0.001744	0.001719	0.003352	0.000254	0.004096	-4.5e-05	0.003172	0.003506	0.001423	0.002699	5e-05	0.002071	0.001652	0.001151	0.005312	0.001902	0.001586	0.003128	0.001704	0.001082	0.004195	0.001861	0.002979	0.002429	0.002657	0.001666	0.002968	0.002973
219191_s_at	-0.006511	-0.007925	-0.006923	-0.006804	-0.006638	-0.006069	-0.000169	0.001348	-0.003013	-0.007472	-0.005118	-0.00993	-0.0019	0.001015	-0.000677	-0.004503	0.000273	9.6e-05	-0.00924	-0.006275	-0.006815	-0.002377	-0.006322	-0.000494	-0.006324	0.000184	-0.005758	-0.000483	0.000333	-0.006101	-0.005137	-0.008318	-0.004746	0.000612	-0.002096	0.003639	-0.005896	-0.004578	0.001371	-0.009376	-0.0005	0.000597	-0.002902	-0.003321	-0.003986	-0.006552	0.001103	0.002363	0.003033
219202_at	-0.006087	-0.003036	-0.000681	0.002092	0.002409	-0.00097	0.000214	0.001222	0.000849	-0.00077	9.4e-05	0.000411	-0.000737	0.000781	0.001514	0.001843	0.00234	0.001584	0.003116	0.001241	-0.000215	0.001924	-0.000302	0.004073	0.001307	0.003189	0.00103	-7.2e-05	0.001755	0.001048	0.001565	-0.001317	0.001084	0.003561	0.001956	0.000949	0.002477	0.001536	0.002581	0.001152	0.002956	0.002701	0.002039	0.00073	0.003419	0.000832	0.001061	0.00313	0.002187
219209_at	-0.00108	-0.003739	5.5e-05	0.005057	0.002047	-0.000148	0.002392	0.00101	0.00098	-0.002554	-0.000929	0.000812	0.003383	0.004977	0.001835	0.000133	0.001858	0.000869	0.002935	0.00106	-0.001306	0.003159	0.004702	0.001601	0.001414	0.003933	0.000352	0.000349	0.002999	0.003351	-0.000911	0.000389	0.001884	0.004545	-0.001284	0.003289	0.000308	0.000512	0.002363	0.000318	0.008399	0.004547	-0.00043	-0.000199	0.003824	-0.001617	0.004333	0.003122	0.003091
219211_at	0.000894	0.001116	-0.000836	0.004747	0.000672	-0.001097	0.003657	0.003334	-0.002475	-0.000975	0.000374	0.000748	0.001794	0.002279	0.000953	0.000403	0.000366	0.00094	0.00337	0.00075	-0.00011	0.003513	0.004175	-0.000396	0.002329	0.003974	-0.000842	0.000587	0.00161	0.004162	-0.002336	-0.000504	0.003173	0.005457	-0.000965	0.001397	-0.000302	-0.000745	-0.001092	0.000789	0.004359	0.003435	0.000571	-0.000167	0.002949	-0.001394	0.002681	0.00326	0.003544
219243_at	-0.000744	-0.003197	0.000628	0.003929	0.000729	0.0007	0.003144	0.003155	0.004383	-0.000501	0.001392	0.002808	0.0029	0.003893	0.002774	0.002561	0.003643	0.003821	-0.00051	0.004014	0.001266	0.003382	0.000972	0.002644	0.002198	0.006015	0.000564	0.00253	0.003911	0.000971	0.002195	0.002083	0.001914	0.003816	0.00317	0.007695	5.3e-05	0.001018	0.004216	0.001859	0.001943	0.006377	0.001482	0.000915	-4e-05	0.000367	0.006811	0.003582	0.007897
219279_at	-0.000752	-0.010287	-0.000117	0.001724	0.001065	0.000251	0.000672	0.00097	0.001793	-0.003375	0.001008	-0.002213	0.001586	-9.8e-05	0.00038	-0.000309	0.003082	0.001071	-0.001316	0.001439	0.00027	0.001299	0.00217	0.001165	-0.001205	0.002558	0.000706	0.002316	0.001864	0.000841	-0.000156	-0.000183	0.001155	0.000938	-5e-06	0.004117	-0.002143	0.00111	0.000827	0.001007	8.5e-05	0.003073	0.001501	0.000829	-0.001524	-0.000185	0.002002	0.003492	0.002027
219352_at	0.002117	-0.00196	-0.001542	0.007086	0.001945	-0.00263	0.002479	5.4e-05	0.000553	-0.001384	-0.001433	0.001478	0.005069	0.005417	0.003669	-0.001699	-0.003589	-0.000642	0.00709	0.000444	-0.002084	0.004298	0.002373	0.000814	0.000846	0.003972	-0.001827	0.001997	0.00389	0.005104	0.000391	0.000578	0.007322	0.003389	-0.001586	0.001879	0.000905	0.001464	-0.000675	-0.000485	0.002267	0.004354	0.000459	-0.000997	0.002036	-0.001599	0.001475	0.002998	0.003701
219386_s_at	-0.003163	-0.009267	-0.001252	0.00395	0.003143	0.002385	0.002359	0.002264	0.001945	-0.000969	-0.000768	-4.9e-05	-0.000273	0.004791	-0.000321	-0.000293	0.001721	0.003281	-0.004028	0.000628	-0.002366	6e-06	-0.000698	0.004287	-0.002832	0.006259	-0.002704	-0.000892	0.002427	0.000938	0.004442	-0.002708	0.000268	0.004292	0.0004	0.003883	-0.000245	-0.003483	0.00288	-0.000666	0.002251	0.005792	0.00061	0.001421	0.003076	0.002282	0.005002	0.004568	0.002626
219403_s_at	-0.00312	-0.004752	-0.004458	0.000832	-0.002079	-9.2e-05	0.001382	-0.001765	-0.002433	-0.001178	-0.002328	-0.005344	-0.001414	0.002351	-0.001585	-0.002134	-0.002774	-0.002434	-0.001031	-0.001759	-0.002834	-0.004606	-0.002309	7e-06	-0.002558	0.002089	-0.00321	-0.002603	-0.002591	-0.001971	-0.000234	-0.003325	-0.008092	0.001397	-0.003475	-0.001185	0.001049	-0.003838	-0.00103	-0.003066	0.000392	0.000975	-0.002275	-0.003541	0.000749	-0.002663	0.000374	-0.000394	-0.002123
219424_at	-0.004119	-0.00805	-0.010565	-0.00547	-0.003706	-0.010746	-0.006264	-0.004782	-0.005569	-0.010497	-0.008164	-0.002502	-0.005328	-0.001582	-0.003391	-0.006156	-0.000977	-0.0026	-0.009467	-0.003318	-0.009417	-0.003425	-0.004549	-0.00923	-0.00988	-0.003998	-0.007958	-0.003009	-0.000409	-0.004614	-0.00413	-0.00999	-0.002772	-0.001718	-0.00969	0.000308	-0.008555	-0.004368	-0.00202	-0.003339	-0.003422	-0.002463	-0.004768	-0.004771	-0.013195	-0.004639	-0.000997	-0.001019	-0.000121
219505_at	0.009152	0.004934	0.005736	0.007649	0.006211	0.004666	0.006581	0.008522	0.006793	0.004642	0.008263	0.006444	0.006165	0.009354	0.00887	0.005743	0.007377	0.007607	0.00558	0.007136	0.004938	0.005026	0.004288	0.007407	0.006221	0.009019	0.00473	0.006176	0.006994	0.007574	0.007942	0.00387	0.007691	0.008334	0.006916	0.009734	0.004146	0.005845	0.008171	0.007635	0.006007	0.010069	0.006399	0.007295	0.00657	0.006539	0.008648	0.010101	0.008654
219519_s_at	-0.002691	-0.000981	-0.00397	0.002851	-0.000172	-0.000909	0.002684	0.000953	0.003638	-0.007047	-0.007142	-0.000181	0.000141	0.000609	0.001909	-0.00828	-0.003854	0.00142	-0.000791	0.000488	-0.003526	-0.004539	0.001866	-0.000505	-0.002292	0.004068	-0.008605	-0.001498	0.001693	0.001468	0.001272	-0.0104	-0.000878	0.001829	-0.00423	0.001795	0.001585	-0.009092	0.001619	-0.01052	0.000472	0.002968	0.000259	-0.003752	0.00033	0.000292	0.000687	0.002555	-4e-05
219574_at	-0.003779	-0.005151	-0.003778	-0.002216	-0.003684	-0.002161	-0.001692	-0.002901	-0.002127	-0.004186	-0.001733	-0.003857	-0.003092	-0.001088	-0.003036	-0.002748	-0.001144	-0.001363	-0.002193	-0.002979	-0.005212	-0.002206	-0.003666	-0.001014	-0.004301	-0.000156	-0.002914	-0.002072	-0.002349	-0.003649	-0.002839	-0.003207	-0.004841	-0.002883	-0.004404	0.000711	-0.002638	-0.002768	-0.002579	-0.004458	-0.001808	0.000407	-0.003934	-0.003097	-0.002825	-0.002858	9.4e-05	-0.001249	-0.001295
219593_at	0.005793	-0.001638	0.002689	0.008246	0.003291	0.001916	0.005544	0.004075	0.002521	0.002357	0.004052	0.002037	0.004181	0.007777	0.004675	0.004115	0.006626	0.005175	0.00376	0.003375	0.002146	0.003377	0.004515	0.004796	0.004361	0.007954	0.003132	0.004367	0.00559	0.003636	0.006032	0.001898	0.004942	0.005766	0.004331	0.005966	0.003115	0.001871	0.004118	0.004187	0.007896	0.007068	0.004347	0.004538	0.004356	0.006288	0.005411	0.006909	0.004225
219607_s_at	-0.001545	-0.000849	0.000849	0.002487	0.003161	0.004803	0.003197	0.006056	0.007917	-0.001373	0.003105	0.002575	2e-06	0.002818	0.00265	-0.000181	0.001844	0.003038	0.001371	0.007207	0.000867	0.004298	0.000416	0.005415	0.00199	0.008174	0.001579	0.001317	0.001995	0.002017	0.005084	0.002084	0.000906	0.004507	0.002754	0.00698	0.004024	-0.000175	0.004556	0.001994	0.004902	0.006249	0.004517	0.004282	0.00236	0.003135	0.004837	0.004814	0.00622
219666_at	0.009008	0.007637	0.007748	0.009028	0.00781	0.007009	0.007623	0.010097	0.010102	0.005899	0.008455	0.007281	0.006903	0.010286	0.00871	0.006334	0.009008	0.008853	0.005118	0.009603	0.006608	0.008708	0.007848	0.008713	0.003542	0.011483	0.007237	0.007932	0.008359	0.007089	0.009161	0.006796	0.008774	0.009373	0.008501	0.0111	0.006953	0.006986	0.008716	0.007945	0.008038	0.010506	0.009147	0.006704	0.005971	0.007614	0.010596	0.008782	0.008854
219667_s_at	-0.004005	-0.003319	-0.002173	-0.00803	-0.00117	-0.005585	-0.007986	-0.001846	-0.004199	-0.005461	-0.002887	-0.00027	-0.004911	-0.001769	-0.002057	-0.003233	-0.003915	-0.001864	-0.006971	-0.005095	-0.003882	-0.000633	-0.006425	-0.00158	-0.007637	-0.00231	-0.005755	-0.004555	-0.004377	-0.003343	-0.005441	-0.003068	-0.002677	-0.00426	-0.004995	0.006991	-0.00613	-0.005676	-9.6e-05	-0.005749	-0.013279	-0.003047	-0.009418	-0.005694	-0.010497	-0.00444	-0.000923	-0.005914	0.002281
219684_at	0.000797	-0.002883	-0.001027	0.00447	0.002618	0.000643	0.001512	0.00144	-0.001798	-0.001368	0.000987	0.001662	0.004558	0.005527	0.003835	2.5e-05	-0.001151	0.000428	0.003941	0.001497	-3.1e-05	0.002196	0.003705	-0.000451	0.00143	0.002711	-0.00228	0.000162	0.001576	0.002871	9.3e-05	-0.000318	0.00469	0.003195	0.000655	0.002057	-0.000946	0.001635	0.002018	-0.000922	0.006034	0.004827	0.001707	-0.000331	0.002868	-0.001274	0.001478	0.001379	0.002785
219690_at	0.001785	0.003407	0.001162	0.003664	0.001378	0.000358	1.1e-05	0.003906	0.001644	0.001195	0.000104	0.002413	0.002006	0.005265	0.001705	0.001246	0.002188	0.001308	0.001632	0.000275	-0.000807	0.000178	0.0015	0.002995	-0.00028	0.004835	0.00023	0.001155	0.002311	0.002043	0.002451	-0.000153	-0.000603	0.00369	0.001377	0.004114	-0.000493	0.0005	0.003066	0.000325	0.002789	0.005153	0.002299	0.003094	0.001631	0.001611	0.0032	0.003146	0.003876
219691_at	-0.007875	-0.004564	-0.001126	0.000539	-0.003647	-8.3e-05	-0.00131	-0.001267	-0.001883	-0.006385	-0.003915	-0.001267	0.001617	0.001656	0.001084	-0.002099	-0.001457	-0.00235	1e-06	-0.000236	-0.003245	-0.000134	0.00148	-0.002153	0.001364	0.000999	-0.004671	-0.002393	-0.000213	0.000783	-0.004674	-0.002175	7e-05	0.001661	-0.003511	0.001271	-0.0016	-0.002714	-0.003703	-0.003607	-0.000179	0.001789	-0.001722	-0.000828	-0.000421	-0.001486	-0.000734	-0.000783	0.001847
219716_at	0.000417	-0.005546	-0.000556	0.003598	0.001258	-0.00583	0.00137	-0.000495	-0.001005	-0.000544	-0.004102	0.00105	-0.000772	0.005666	-0.000312	0.002385	0.000543	0.000926	0.001431	0.001073	-0.00051	0.000512	0.00267	0.002318	0.000924	0.00381	0.000248	-0.000722	0.001835	0.000981	0.001738	0.000221	0.000484	0.003184	0.000214	0.001829	-0.000871	0.001011	0.00072	0.000653	0.005244	0.003001	-0.001766	-0.000261	0.00424	0.000601	0.003801	0.003809	0.003177
219812_at	-0.007614	-0.007797	-0.00232	0.000814	-0.000482	-0.002705	-0.000651	-6.8e-05	0.000798	-0.004977	-0.00147	0.000338	-0.000568	0.001359	0.001816	-0.000626	0.001466	0.002281	-0.003021	0.00083	-0.001104	0.002495	-0.002068	0.001976	-0.003033	0.001581	-0.003303	-0.000877	3.7e-05	0.00032	0.001288	-0.002319	0.00154	0.002129	-0.000742	0.0062	-0.004644	-0.003179	0.001435	0.000338	0.000847	0.001553	-0.001195	1.9e-05	-0.000626	-0.001903	0.000415	0.000142	0.002793
219863_at	-0.001076	0.001522	-0.001596	0.004542	0.000462	-0.000892	0.003574	0.000404	-0.000159	0.000524	0.000108	0.002075	0.003055	0.003457	0.001348	-0.000153	9e-05	0.001018	0.005204	-0.000824	-0.002104	0.002444	0.001914	0.000848	0.001279	0.004361	-0.001262	0.000155	0.002509	0.003166	0.001896	-0.000192	0.002244	0.002797	0.00052	0.002398	-0.000685	0.002875	-0.000591	-0.001271	0.005877	0.003479	-0.000556	-0.001481	0.003686	-0.000801	0.001616	0.001433	0.00326
219947_at	-0.002948	-0.001778	-0.003988	-0.001532	-0.00157	-0.001895	-0.001358	-0.000266	-0.000934	-0.005778	-0.00119	-0.002623	-0.003527	-0.000386	-0.002184	-0.003195	-0.000339	-0.000263	-0.005824	-0.001539	-0.003113	-0.000884	-0.004056	-0.001811	-0.002996	0.001852	-0.002953	-0.001687	0.002211	-0.003851	-0.00111	-0.002146	-0.00226	-0.001683	-0.001598	0.000815	-0.003993	-0.00514	-0.001384	-0.003905	-0.000241	0.001428	-0.003162	-0.002634	-0.00458	-0.002712	0.000245	-0.000468	-0.00172
219971_at	-0.005392	-0.009167	-0.004824	-0.001638	-0.003775	-0.003333	-0.004809	-0.005249	-0.001157	-0.009629	-0.005845	-0.009304	-0.003413	-0.003353	-0.006388	-0.004274	-0.004565	-0.001162	-0.005621	-0.001982	-0.005168	-0.002692	-0.003624	-0.001934	-0.002948	0.000725	-0.007907	-0.003532	-0.004803	-0.008142	-0.001127	-0.004409	-0.00968	-0.004236	-0.006364	0.000199	-0.01025	-0.008166	-0.002155	-0.009702	-0.002976	0.001878	-0.002485	-0.009101	-0.008115	-0.002054	-0.001976	-0.000292	-0.00232
220005_at	-0.00704	-0.007744	-0.002964	0.000453	-0.002885	-0.004862	-0.003694	0.001274	0.000589	-0.005234	-0.00117	-0.002703	0.000166	-0.002273	0.000561	-0.001375	0.002086	-0.001242	-0.008477	0.001671	-0.002249	-0.000541	-0.001998	-0.001714	-0.00559	0.002007	-0.002419	0.002057	0.001759	-0.00321	-0.000939	-0.001301	0.001182	-0.001515	-0.001921	0.003129	-0.00482	-0.000324	-0.000721	-0.000904	-0.001898	0.000557	0.000169	-0.001584	-0.010856	-0.002423	0.001368	-0.001058	0.000709
220059_at	-0.007689	-0.004215	-0.004994	-0.008588	-0.004125	-0.005971	-0.004479	-0.002833	-0.009135	-0.003247	-0.006288	-0.003306	-0.011784	-0.003773	-0.005072	-0.007957	-0.003811	-0.004093	-0.003757	-0.009881	-0.0065	-0.002676	-0.005859	-0.005389	-0.009114	-0.003665	-0.010841	-0.006567	-0.006232	-0.003186	-0.006735	-0.004574	-0.004047	-0.004389	-0.009115	0.003342	-0.003887	-0.004554	-0.00235	-0.004581	-0.005393	-0.002226	-0.007499	-0.006635	-0.005215	-0.006479	-0.003845	-0.001407	0.000563
220132_s_at	-0.007024	-0.00126	-0.003818	-0.007473	-0.004646	-0.005065	-0.003812	-0.003191	-0.004653	-0.006419	-0.005017	-0.005059	-0.007098	-0.001303	-0.004326	-0.007488	-0.004647	-0.001505	-0.007038	-0.002642	-0.004499	-0.001022	-0.005579	-0.003388	-0.005075	-0.001515	-0.003711	-0.005608	-0.004894	-0.006039	-0.004774	-0.005647	-0.003837	-0.004448	-0.005458	0.001104	-0.010537	-0.004527	-0.003783	-0.005105	-0.00147	-0.00154	-0.005132	-0.006638	-0.004961	-0.006672	-0.001217	-0.003755	-0.000151
220146_at	-0.005653	-0.00084	-0.000944	-0.000307	-0.002271	-0.003045	-0.002742	-0.001029	0.002187	-0.002458	-0.000336	-0.002297	0.000758	-0.001704	0.001478	-0.002668	0.002588	0.000708	-0.003076	0.000558	-0.001806	0.000417	0.000542	-0.00068	-0.006089	-1.9e-05	-0.002476	0.001659	0.001065	-0.002583	-0.001465	-0.00342	-0.000233	-0.000371	-0.000571	0.002166	-0.003065	-0.000841	0.000925	-0.000298	-5.9e-05	0.002113	0.00011	-0.002182	-0.002342	-0.000604	0.002496	-0.000164	5.8e-05
220330_s_at	-0.000615	-0.001612	0.00068	0.002569	0.001469	0.000355	0.002363	0.003184	0.00212	0.00192	0.00111	-0.000676	0.00106	0.002616	0.001445	-0.000281	0.001875	0.001679	-0.00056	0.000106	-0.000596	0.001704	0.001041	0.002213	0.000107	0.005451	0.000779	0.002091	0.002777	0.000932	0.001685	0.000443	0.000778	0.003128	-0.000562	0.004726	0.000655	0.00183	0.001183	-0.001296	0.002896	0.004911	0.000907	0.000689	0.00044	0.001102	0.00267	0.002011	0.002535
220418_at	-0.006136	-0.006378	-0.006083	-0.01425	-0.014772	-0.012573	-0.007393	-0.013908	-0.014504	-0.014333	-0.015119	-0.014462	-0.013766	-0.011351	-0.014924	-0.010855	-0.009074	-0.011794	-0.012654	-0.004759	-0.014136	-0.01209	-0.013003	-0.006793	-0.014754	-0.007273	-0.013626	-0.010413	-0.013636	-0.006576	-0.009902	-0.014456	-0.013626	-0.01406	-0.010778	-0.001678	-0.013747	-0.01466	-0.00485	-0.014908	-0.014072	-0.005597	-0.008313	-0.01534	-0.013402	-0.008324	-0.01312	-0.014656	-0.004275
220423_at	-0.003941	-0.00699	-0.009188	-0.008185	-0.007496	-0.0089	-0.009468	-0.00038	-0.008294	-0.008607	-0.00887	-0.008986	-0.0092	0.00183	-0.010504	-0.007374	-0.010343	-0.000906	-0.008851	-0.006954	-0.010769	-0.009257	-0.007999	-0.00772	-0.007859	-0.004858	-0.009824	-0.008409	-0.008663	-0.008586	-0.007476	-0.010316	-0.007462	-0.008504	-0.008969	0.005706	-0.00764	-0.007303	-0.006702	-0.008706	-0.00893	-0.002917	-0.009855	-0.009427	-0.008639	-0.008309	-0.006907	0.001218	0.001533
220577_at	0.000959	0.000382	-0.000578	0.001427	0.000566	-0.00143	-0.000511	0.000267	0.00118	-0.002561	-0.001072	0.000913	-0.001297	0.001627	-0.000895	-0.001372	0.000834	0.000951	-0.002197	-0.00057	-0.000644	-0.000594	-0.001504	0.000234	-0.003115	0.002195	-0.001497	-0.00105	-0.000785	0.000173	0.000776	-0.002421	-0.001675	-0.000175	7.8e-05	0.004206	-0.003229	-0.000913	0.001823	0.001879	-0.000677	0.001705	-0.002763	-0.0003	-0.000195	-0.000727	0.001984	0.001108	0.002184
220731_s_at	0.005736	0.006367	0.004386	0.006065	0.004864	0.005176	0.004564	0.005921	0.006432	0.005566	0.005142	0.005465	0.005622	0.008542	0.005897	0.005805	0.005877	0.007274	0.00614	0.005007	0.004915	0.005768	0.005901	0.006146	0.004441	0.006932	0.005317	0.005788	0.005134	0.00588	0.005901	0.004848	0.006405	0.006328	0.00501	0.007737	0.005237	0.005103	0.006013	0.005989	0.007731	0.006701	0.005737	0.004982	0.005501	0.006207	0.006377	0.006558	0.005305
220832_at	-0.008181	-0.009679	-0.010301	-0.010692	-0.006144	-0.010306	-0.008186	-0.006375	-0.00316	-0.004843	-0.0082	-0.006568	-0.00536	-0.003852	-0.01464	-0.013786	-0.003931	-0.002698	-0.012814	-0.00877	-0.015186	-0.007885	-0.010808	-0.004646	-0.013676	-0.000435	-0.01204	-0.006041	-0.009559	-0.00777	-0.005588	-0.00618	-0.00538	-0.006105	-0.006481	-0.001692	-0.010215	-0.01261	-0.005531	-0.006352	-0.004043	-0.001848	-0.012416	-0.008793	-0.012968	-0.004453	-0.002039	0.000513	-0.003005
221004_s_at	0.001319	0.001188	0.004039	0.00315	0.005129	0.002741	0.002351	0.005304	0.008211	0.005273	0.001938	0.004086	0.000451	0.009092	0.003449	0.002785	0.003928	0.003985	0.001166	0.004721	0.00412	0.004336	0.001541	0.00717	0.004581	0.007364	0.004295	0.003527	0.002606	0.003762	0.005789	0.001914	0.004209	0.005578	0.004375	0.007558	0.002373	0.004212	0.007251	0.002982	0.001981	0.0079	0.004017	0.004094	0.000922	0.003433	0.005461	0.007782	0.005318
221060_s_at	0.002567	0.001409	-0.00102	0.001323	0.000212	-0.000935	0.001277	0.001482	0.002419	0.000521	0.000606	0.001152	0.000701	0.003019	0.000531	2e-06	0.001636	0.001312	-0.000984	0.002283	-0.000267	0.000496	0.001737	0.002341	-0.000248	0.002999	-0.001047	0.000756	0.002065	-6.6e-05	0.00253	-0.001029	0.000947	0.00257	0.001228	0.00243	5.5e-05	0.000982	0.000938	0.000946	0.000193	0.002976	0.002792	0.001848	0.001276	0.000841	0.002391	0.004201	0.002421
221210_s_at	-0.00639	-0.006129	-0.00162	0.00031	0.00013	0.000558	0.000504	0.002379	0.002246	-0.002342	0.001027	-0.002051	-0.000274	0.001742	0.000233	-0.002252	-0.001164	0.001897	-0.001334	0.0024	-0.001404	0.00254	-0.000897	0.000763	-0.001591	0.003356	-0.000223	-0.001074	-0.000683	0.000384	0.001836	-0.001428	-0.002562	0.002719	5.1e-05	0.00403	-0.000383	-0.0011	0.000508	-0.001095	0.004195	0.002773	0.000164	0.001099	0.000449	0.002089	0.003905	0.004471	0.000351
221218_s_at	-0.000816	0.001797	-0.000169	0.000557	0.000544	5.9e-05	-5.3e-05	0.002607	0.001806	-0.001013	0.00022	-0.000937	0.000281	0.000721	0.000578	-0.000902	0.000452	-0.000289	-0.001423	0.000237	0.000241	0.001187	-0.00034	0.000205	0.000575	0.001982	-0.000803	0.000971	0.001443	0.000256	0.00099	-0.000549	0.000806	0.002993	0.000457	0.002075	-0.001061	0.001631	0.00262	0.00021	0.000184	0.002247	-0.000106	-0.00022	-0.000325	0.000493	0.002243	0.00178	0.000346
221253_s_at	0.013346	0.010291	0.012355	0.012124	0.012376	0.010681	0.011312	0.012668	0.012642	0.012425	0.011378	0.011479	0.009854	0.015267	0.011202	0.010901	0.011336	0.011814	0.011188	0.012643	0.012117	0.010941	0.01003	0.01221	0.011298	0.014077	0.011202	0.010558	0.010596	0.011174	0.013843	0.011383	0.011565	0.012826	0.010771	0.013317	0.011549	0.011825	0.012898	0.01084	0.012327	0.013363	0.010741	0.012599	0.011172	0.011895	0.012546	0.014515	0.012576
221286_s_at	-0.005468	-0.009103	-0.00521	-0.007812	0.001265	-0.005186	0.005536	0.002791	-0.006758	0.003167	-0.004498	-0.000418	-0.006335	0.006232	-0.003283	-0.008342	-0.00361	0.00143	0.001308	0.002919	0.000409	0.003061	-0.009142	-0.006678	-0.00969	0.00772	-0.005789	0.000978	-0.001567	0.004427	-0.002183	0.000975	-0.001403	0.004435	-0.003902	0.006957	0.005261	0.007583	0.004417	-0.00932	-0.006201	0.008773	-0.005827	0.00288	-0.007259	-0.004247	0.002827	0.008642	0.005558
221331_x_at	-0.003794	-0.00816	-0.013054	2e-06	-0.002509	-0.00178	-0.00187	-0.00049	-0.007637	-0.008988	-0.005598	-0.003655	-0.002927	-0.001274	-0.00252	-0.003799	-0.002053	-0.001346	-0.007901	-0.008899	-0.009905	-0.00141	-0.003774	-0.002064	-0.005072	0.000306	-0.004136	-0.004164	-0.002912	-0.002799	-0.002462	-0.004614	-0.004443	-0.000263	-0.002475	-0.000739	-0.000755	-0.003002	-0.001783	-0.003914	-0.000727	0.000343	-0.009466	-0.002085	-0.000706	-0.003634	0.000146	0.000833	-0.000932
221581_s_at	0.000588	0.00089	0.002868	0.004339	0.001972	0.000771	0.003412	0.001977	0.001661	0.000705	0.002423	-0.000189	0.003425	0.002893	0.003509	0.001122	0.004955	0.002943	-0.000935	0.001848	0.001379	0.002309	0.002017	0.002552	0.000692	0.00426	0.000473	0.00407	0.00612	0.001045	0.001346	0.001475	0.003343	0.003534	0.001536	0.005627	0.002157	0.003701	0.001634	0.002921	0.001415	0.004064	0.002838	0.00262	0.00253	0.002044	0.003062	0.002846	0.003889
221651_x_at	0.012401	0.011216	0.018208	0.019042	0.018592	0.011943	0.014317	0.018273	0.017955	0.016983	0.016219	0.018951	0.009314	0.022267	0.016508	0.016353	0.01666	0.018487	0.014336	0.018426	0.017633	0.016129	0.016411	0.017821	0.009803	0.019343	0.016898	0.018462	0.016433	0.018412	0.020633	0.016972	0.017432	0.019493	0.017879	0.019128	0.009752	0.019176	0.018615	0.018824	0.015717	0.019016	0.016105	0.019402	0.017621	0.011968	0.017328	0.019746	0.018225
221658_s_at	-0.003673	-0.001139	-0.00778	0.002491	0.000554	-0.003768	1.8e-05	-0.001773	5.2e-05	-0.002603	-0.002536	-0.003131	-0.003154	-0.000687	-0.00046	-0.001334	-0.001544	0.001368	-0.003308	-0.007681	-0.001953	-0.001143	-0.001918	0.001398	-0.007307	0.00393	-0.004673	-0.001811	-0.001861	-0.001577	0.001532	-0.003707	-0.001453	0.001197	-0.002198	0.002653	-0.008152	-0.006908	-0.000443	0.000615	0.000792	0.002747	-0.003069	-0.002861	-0.001033	0.000751	0.00186	0.001655	0.000909
221671_x_at	0.013633	0.011991	0.01796	0.019261	0.018735	0.011927	0.014202	0.018294	0.017701	0.017176	0.016084	0.018838	0.008561	0.022529	0.016077	0.01658	0.016706	0.018456	0.014001	0.018428	0.017602	0.016336	0.015984	0.017663	0.009798	0.019504	0.017017	0.018167	0.016543	0.018189	0.020349	0.017103	0.017376	0.019143	0.017668	0.0191	0.009079	0.019101	0.018586	0.018523	0.015116	0.018901	0.015264	0.019223	0.017729	0.011932	0.017362	0.019594	0.018405
221698_s_at	0.004255	0.001551	0.000212	0.003507	0.000748	0.001173	0.001685	0.001455	0.000378	0.002894	0.002122	5e-06	0.001406	0.003868	0.001979	0.001059	0.003561	0.0023	-0.000365	0.002949	-0.000363	0.002191	0.002104	0.006319	0.001054	0.006696	0.000848	0.001949	0.001928	0.000311	0.002696	-0.000234	0.001667	0.004421	0.000863	0.003321	0.002036	0.000326	0.001359	0.00059	0.004489	0.004526	0.001502	0.001343	0.005806	0.001548	0.004477	0.003073	0.000377
221724_s_at	-0.007531	-0.007438	-0.003092	-0.006972	-0.000457	-0.003354	-0.002624	0.00023	-0.001567	-0.008944	-0.00211	-0.002988	-0.002131	-0.002282	-0.001568	-0.003006	0.000561	-0.001768	-0.007266	0.000431	-0.001918	-0.002194	-0.007914	-0.001484	-0.004829	0.002473	-0.0056	-0.001514	0.00181	-0.001417	-0.001523	-0.001561	-8e-06	0.000786	-0.000481	0.001385	-0.005529	-0.006227	-0.001172	-0.004137	-0.000427	0.00107	-0.002421	-0.004201	-0.006886	-0.003265	0.001836	-0.001114	7.4e-05
221875_x_at	0.014517	0.013567	0.010882	0.016754	0.013574	0.011927	0.01266	0.012159	0.012348	0.010072	0.010341	0.012953	0.013813	0.018677	0.012794	0.012214	0.012809	0.013475	0.01386	0.011336	0.009863	0.012665	0.012782	0.013402	0.011586	0.015286	0.010644	0.012195	0.013735	0.013626	0.014559	0.009264	0.014221	0.013358	0.01227	0.015274	0.009767	0.012451	0.01338	0.012782	0.01372	0.015712	0.011148	0.011505	0.0137	0.012211	0.012726	0.015518	0.014519
221969_at	-0.00362	0.000151	-0.00274	-0.001009	-0.000213	-0.004931	-0.005041	0.000309	-0.004634	-0.001961	-0.00164	-0.000327	-0.003712	-0.002467	-0.000754	-0.001647	-0.002868	-0.002353	-0.002099	-0.003004	-0.002527	0.000805	-0.004377	-0.001815	-0.00714	-0.000307	-0.001541	-0.005049	-0.008212	-0.002822	-0.004769	-0.001276	-0.002084	-0.000215	-0.001769	0.006489	-0.002574	-0.000894	0.000452	-0.002522	-0.002804	0.000911	-0.004033	-0.002685	-0.003162	-0.001305	0.000419	-9e-06	0.002712
221978_at	0.002492	0.001318	-0.000384	0.003	0.000806	-0.000945	-0.000223	0.000371	-6.4e-05	-0.001235	-0.001119	-0.001108	0.000132	0.003004	0.000426	-0.000963	0.000403	0.000364	-0.001548	-0.00249	-0.002318	-0.000411	-0.000571	-0.000577	-0.001216	0.000722	-0.002969	-0.000489	0.000557	0.000503	0.001587	-0.001861	0.000351	0.001841	-0.001818	0.001655	-0.002246	0.000816	0.000608	0.000675	0.000308	0.003189	-0.000144	-0.000132	0.001334	8.7e-05	-4.1e-05	0.00086	0.001111
222218_s_at	0.000692	0.001804	0.001059	0.002389	0.00088	0.000631	0.001872	0.001627	0.001497	-0.000735	0.00153	0.000977	0.000438	0.001764	0.001273	0.001998	0.002268	0.001921	-0.00064	0.002181	-0.000492	7.2e-05	0.00178	0.002128	0.001058	0.004257	0.001047	0.001275	0.00096	0.001416	0.001006	-0.000644	0.001711	0.004096	0.001987	0.002117	0.001042	-0.001521	0.001705	0.000933	0.002238	0.003451	0.000709	0.001644	0.002304	0.002019	0.002623	0.004219	0.000868
34210_at	0.000395	-0.006204	-0.000241	0.002055	0.003299	0.001249	0.003182	0.007005	0.001678	-2e-05	0.001145	0.003661	0.000504	0.005442	0.003249	0.000559	0.004104	0.004162	-0.00097	0.002825	0.000623	0.00517	-0.001363	0.004121	0.000595	0.005469	0.000582	0.000274	0.000615	0.003859	0.003302	0.000583	0.003601	0.003542	0.001513	0.011439	-0.003323	0.001538	0.006534	0.002578	0.003118	0.006549	0.000611	0.006555	-0.000571	0.003803	0.005853	0.005882	0.008951
35150_at	0.005974	0.005254	0.003354	0.005387	0.004035	0.002028	0.003337	0.002664	0.003619	0.003581	0.003357	0.003537	0.003539	0.005925	0.00322	0.004001	0.003895	0.004336	0.005448	0.00272	0.002685	0.003402	0.003893	0.003764	0.002702	0.006212	0.00281	0.003491	0.00335	0.002541	0.004481	0.002264	0.004337	0.005217	0.003269	0.005491	0.003144	0.004263	0.004273	0.003933	0.002719	0.00533	0.003559	0.003006	0.005628	0.004359	0.005317	0.005301	0.004653
36564_at	0.004308	0.003107	0.002582	0.00607	0.005884	0.00359	0.004764	0.004782	0.003398	0.004194	0.004314	0.004427	0.005303	0.007452	0.00395	0.005355	0.005941	0.005175	0.005213	0.002701	0.003296	0.003833	0.00545	0.00609	0.004187	0.006849	0.003552	0.005491	0.006446	0.004876	0.006581	0.003943	0.004844	0.006753	0.005096	0.003844	0.005329	0.004578	0.00368	0.004539	0.004558	0.006706	0.003833	0.004867	0.007567	0.005842	0.005928	0.00632	0.004807
37145_at	-0.00484	-0.006591	-0.006312	-0.001236	-0.003684	0.003189	-0.001092	-0.002136	-0.002853	-0.008584	-0.002856	-0.001763	-0.008665	0.001091	-0.001871	-0.010454	0.001246	0.00083	-0.003135	-0.002211	-0.002762	-0.002694	-0.008381	-0.002728	-0.009734	0.002031	-0.009757	-0.004897	-0.00281	-0.001851	-0.001833	-0.004466	0.001199	0.002711	-0.003272	0.004048	-0.004364	-0.00507	0.001351	-0.008232	0.003716	0.005132	-0.005231	-0.003605	-0.007186	-0.008311	0.000699	0.003438	0.0018
38149_at	0.002589	0.003216	-0.000106	0.002648	0.001724	5.4e-05	0.002056	0.002214	0.000953	0.001627	0.000343	0.002022	0.000509	0.003972	0.002091	0.000917	0.001382	0.002241	-0.000759	0.00169	-0.001256	0.000995	0.000934	0.002141	0.000327	0.00308	0.000648	0.00157	0.00246	0.001442	0.002288	-0.001051	0.000958	0.002688	0.000617	0.005283	-0.00038	0.001614	0.001962	0.000654	0.001471	0.003682	0.000742	0.000681	0.001155	0.001165	0.002584	0.00316	0.004429
38241_at	-0.001589	0.000269	-2.7e-05	0.003475	-8.8e-05	2.4e-05	5.6e-05	-0.000161	0.000284	-0.001522	-0.000349	0.000901	0.000356	-0.000338	0.000335	-0.000178	0.000945	0.001402	-0.000141	0.001126	0.000157	0.001849	0.00027	-0.000315	-0.001217	0.003327	-0.000625	0.001374	0.00051	5e-05	-0.000335	0.00046	0.000324	-0.000155	-9.1e-05	0.004172	-0.00355	-0.000434	0.002078	-0.000482	0.002374	0.004647	-0.001444	0.000387	0.001018	-0.00085	0.00325	0.001672	0.001287
38964_r_at	0.007372	0.005681	0.004989	0.009054	0.007881	0.006406	0.006776	0.009176	0.008224	0.004987	0.006351	0.006762	0.00574	0.009999	0.008205	0.005474	0.007719	0.007046	0.005475	0.007592	0.005663	0.007361	0.006336	0.007911	0.005915	0.010168	0.00553	0.006851	0.007154	0.006999	0.007574	0.005153	0.007592	0.00781	0.005992	0.009876	0.004641	0.006886	0.007532	0.006868	0.006667	0.009771	0.006732	0.007501	0.005576	0.006669	0.008207	0.008355	0.009538
39318_at	0.000198	0.000256	-0.006131	-0.001657	-0.002134	-0.003619	-0.003472	0.000525	-0.001071	-0.002696	-0.00228	-0.001784	-0.00151	0.002118	-0.001598	-0.001944	-0.003268	-0.000659	-0.001575	0.000452	-0.003152	-0.00081	-0.002199	-0.002024	-0.006073	0.001772	-0.003257	-0.004194	-0.002617	-0.000891	-0.00082	-0.002976	-0.002002	-0.00018	-0.002206	0.006915	-0.00267	-0.005038	-0.000115	-0.00201	-0.001748	-0.002221	-0.003524	-0.001718	-0.001623	-0.007896	6e-06	0.00179	0.003458
44673_at	0.002836	0.001841	0.000552	0.004214	0.001416	0.000425	0.003652	0.002055	0.003753	0.000392	0.000685	0.000887	0.002376	0.001937	0.002394	0.001379	-0.000231	0.002038	0.002827	0.001339	-0.001823	0.000679	0.00261	0.001432	0.001306	0.00412	-0.000145	0.001566	0.001827	0.001571	0.002948	0.000401	0.002154	0.002635	0.000138	0.002273	0.002147	0.00063	0.002241	0.001744	0.001862	0.003746	0.001307	0.001427	0.003092	0.001385	0.002097	0.002892	0.001239
53720_at	-0.001237	0.002015	0.003367	0.005691	0.000878	0.002503	0.00151	0.001824	0.002418	0.000437	0.001419	0.00188	0.003801	0.002969	0.003958	0.001073	0.002772	0.003419	0.003	0.003364	0.002943	0.004393	0.004335	0.00156	0.003093	0.003272	0.001418	0.001929	0.00253	0.002331	-0.000968	0.002273	0.005569	0.000271	0.00087	0.003854	0.001652	0.001829	0.001877	0.001181	0.004239	0.003648	0.002278	0.001129	0.002638	0.002691	0.001689	0.001843	0.002551
64064_at	0.005173	0.006296	0.004391	0.005753	0.004853	0.004435	0.004289	0.005816	0.006288	0.003002	0.003736	0.005347	0.003916	0.008507	0.005558	0.004258	0.004239	0.005495	0.003619	0.006663	0.004683	0.005047	0.003429	0.005527	0.002829	0.006797	0.002681	0.003854	0.004107	0.004596	0.006707	0.004306	0.005016	0.006336	0.004336	0.007887	0.003184	0.004557	0.005887	0.005256	0.00411	0.006914	0.004416	0.00456	0.00391	0.004221	0.007004	0.005736	0.007574
AFFX-HUMISGF3A/M97935_3_at	0.008952	0.008228	0.006864	0.011521	0.008054	0.008347	0.009435	0.00733	0.008254	0.006591	0.007259	0.00805	0.009718	0.011898	0.009148	0.007188	0.009204	0.009206	0.011439	0.007301	0.006435	0.00994	0.010278	0.010272	0.008995	0.011943	0.006207	0.007036	0.008846	0.010052	0.009534	0.007135	0.00998	0.011339	0.006819	0.010338	0.008431	0.006848	0.009484	0.00742	0.011303	0.012298	0.007094	0.006482	0.010578	0.006562	0.011123	0.010545	0.009373
AFFX-HUMISGF3A/M97935_5_at	-0.001615	-0.000578	-0.002108	0.000991	-0.000737	-0.002046	0.001189	-0.00292	-0.003248	-0.003285	-0.001775	0.000525	0.003652	0.004393	-0.00029	-0.001136	0.001535	0.003192	0.001528	-0.000394	-0.002648	0.002625	0.003476	0.002087	-0.00097	0.005604	-0.002673	-0.002369	-0.000831	0.002606	0.000737	-0.001615	0.002584	0.005312	-0.001757	0.003786	0.001187	-0.002832	0.001375	-0.000592	0.006475	0.005417	-0.002531	-0.003223	0.005447	-0.002113	0.006067	0.005052	0.004027
AFFX-HUMISGF3A/M97935_MA_at	0.004017	0.002671	0.002799	0.00686	0.004104	0.003359	0.004724	0.003094	0.002408	0.002912	0.003497	0.004225	0.00786	0.010397	0.005679	0.00467	0.006448	0.00712	0.00713	0.002457	0.001225	0.005396	0.008457	0.006946	0.003154	0.009227	0.001156	0.002616	0.004721	0.006766	0.005778	0.002467	0.008081	0.010932	0.00298	0.007548	0.00516	0.00239	0.005632	0.003763	0.009496	0.009987	0.003186	0.001772	0.009406	0.001663	0.008317	0.009225	0.008098
AFFX-HUMISGF3A/M97935_MB_at	0.001497	0.003479	0.001109	0.005662	0.001567	0.001845	0.003589	0.001965	0.000367	0.001328	0.001481	0.002765	0.005876	0.007351	0.004168	0.001399	0.005064	0.005334	0.005083	0.002219	0.000449	0.004688	0.006185	0.004783	0.002349	0.008232	0.000209	0.00066	0.00335	0.005561	0.00374	0.001441	0.006036	0.008017	0.000722	0.006576	0.003403	0.000918	0.004394	0.001437	0.008506	0.008575	0.001624	0.000694	0.00771	0.000718	0.007844	0.007406	0.006288
[truncated: 138 more columns]
